# Supplementary material for: Plastome Evolution and Phylogeny of Orchidaceae, With 24 New Sequences
Source: PubMed Central journal article supplement (PMC7047749; doi:10.3389/fpls.2020.00022), 2020-02-21

Supplementary Figure S2. IR-SC junction comparison among forty-two plastome sequences generated in the laboratory.

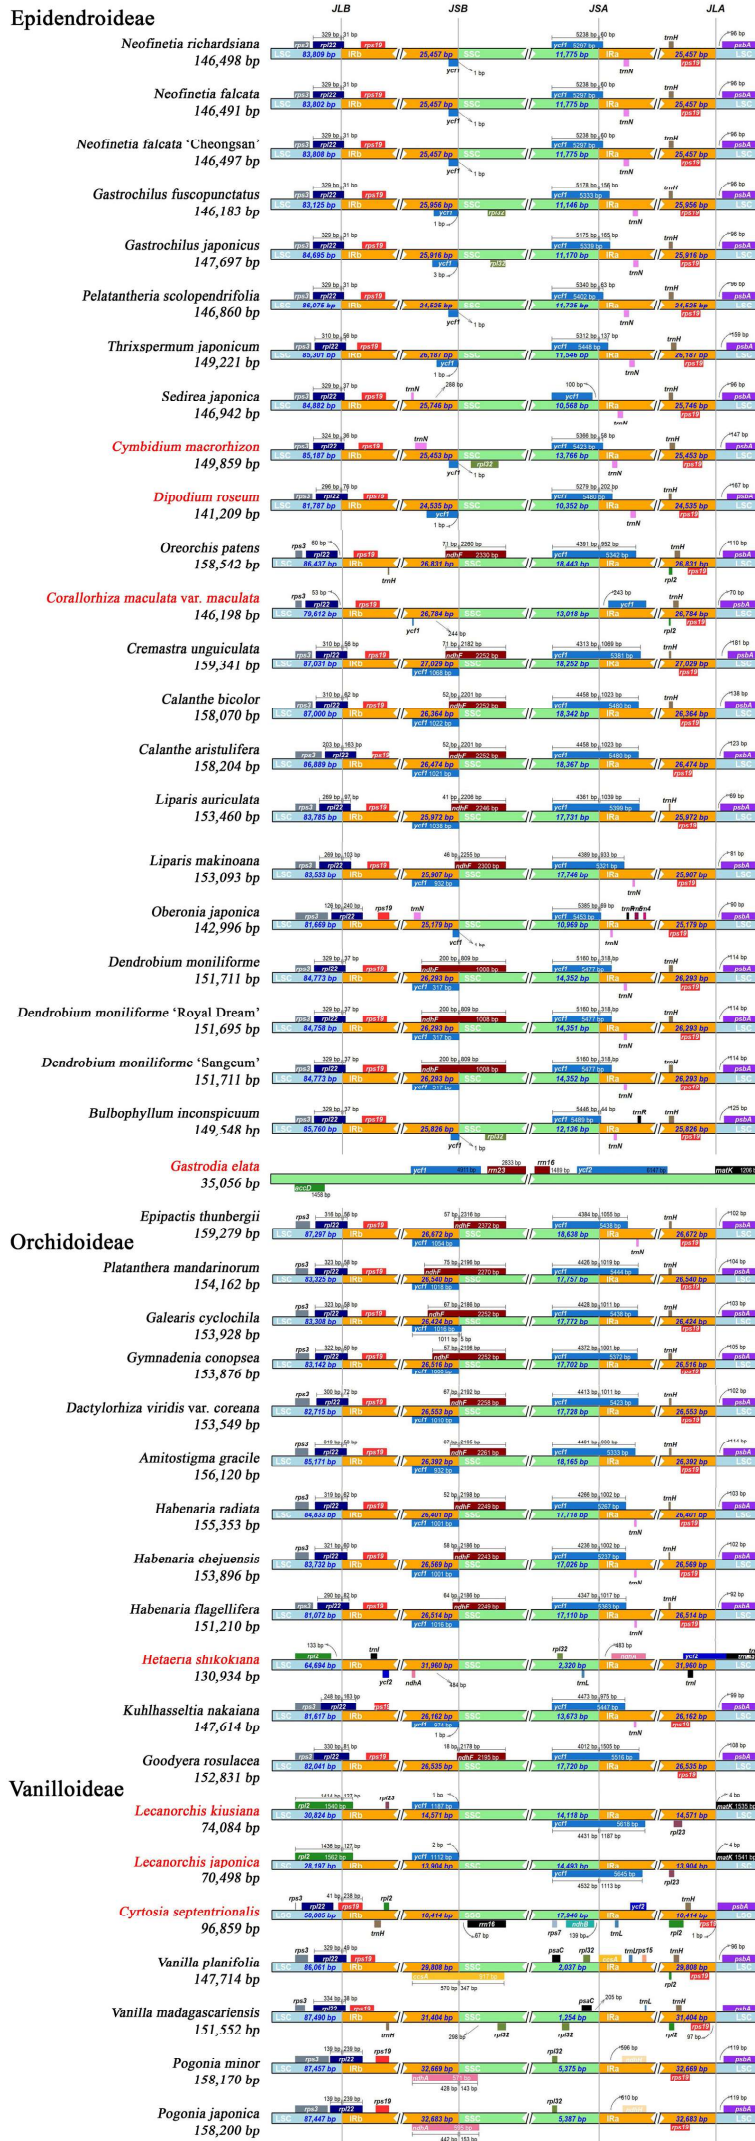

Supplement: DataSheet_2.pdf [file DataSheet_2.pdf]
