# Supplementary material for: Plastome Evolution and Phylogeny of Orchidaceae, With 24 New Sequences
Source: PubMed Central journal article supplement (PMC7047749; doi:10.3389/fpls.2020.00022), 2020-02-21
Supplement: DataSheet_3.pdf [file DataSheet_3.pdf]

Supplementary Figure S3. A maximum likelihood tree made using 83 genes among 129 species.

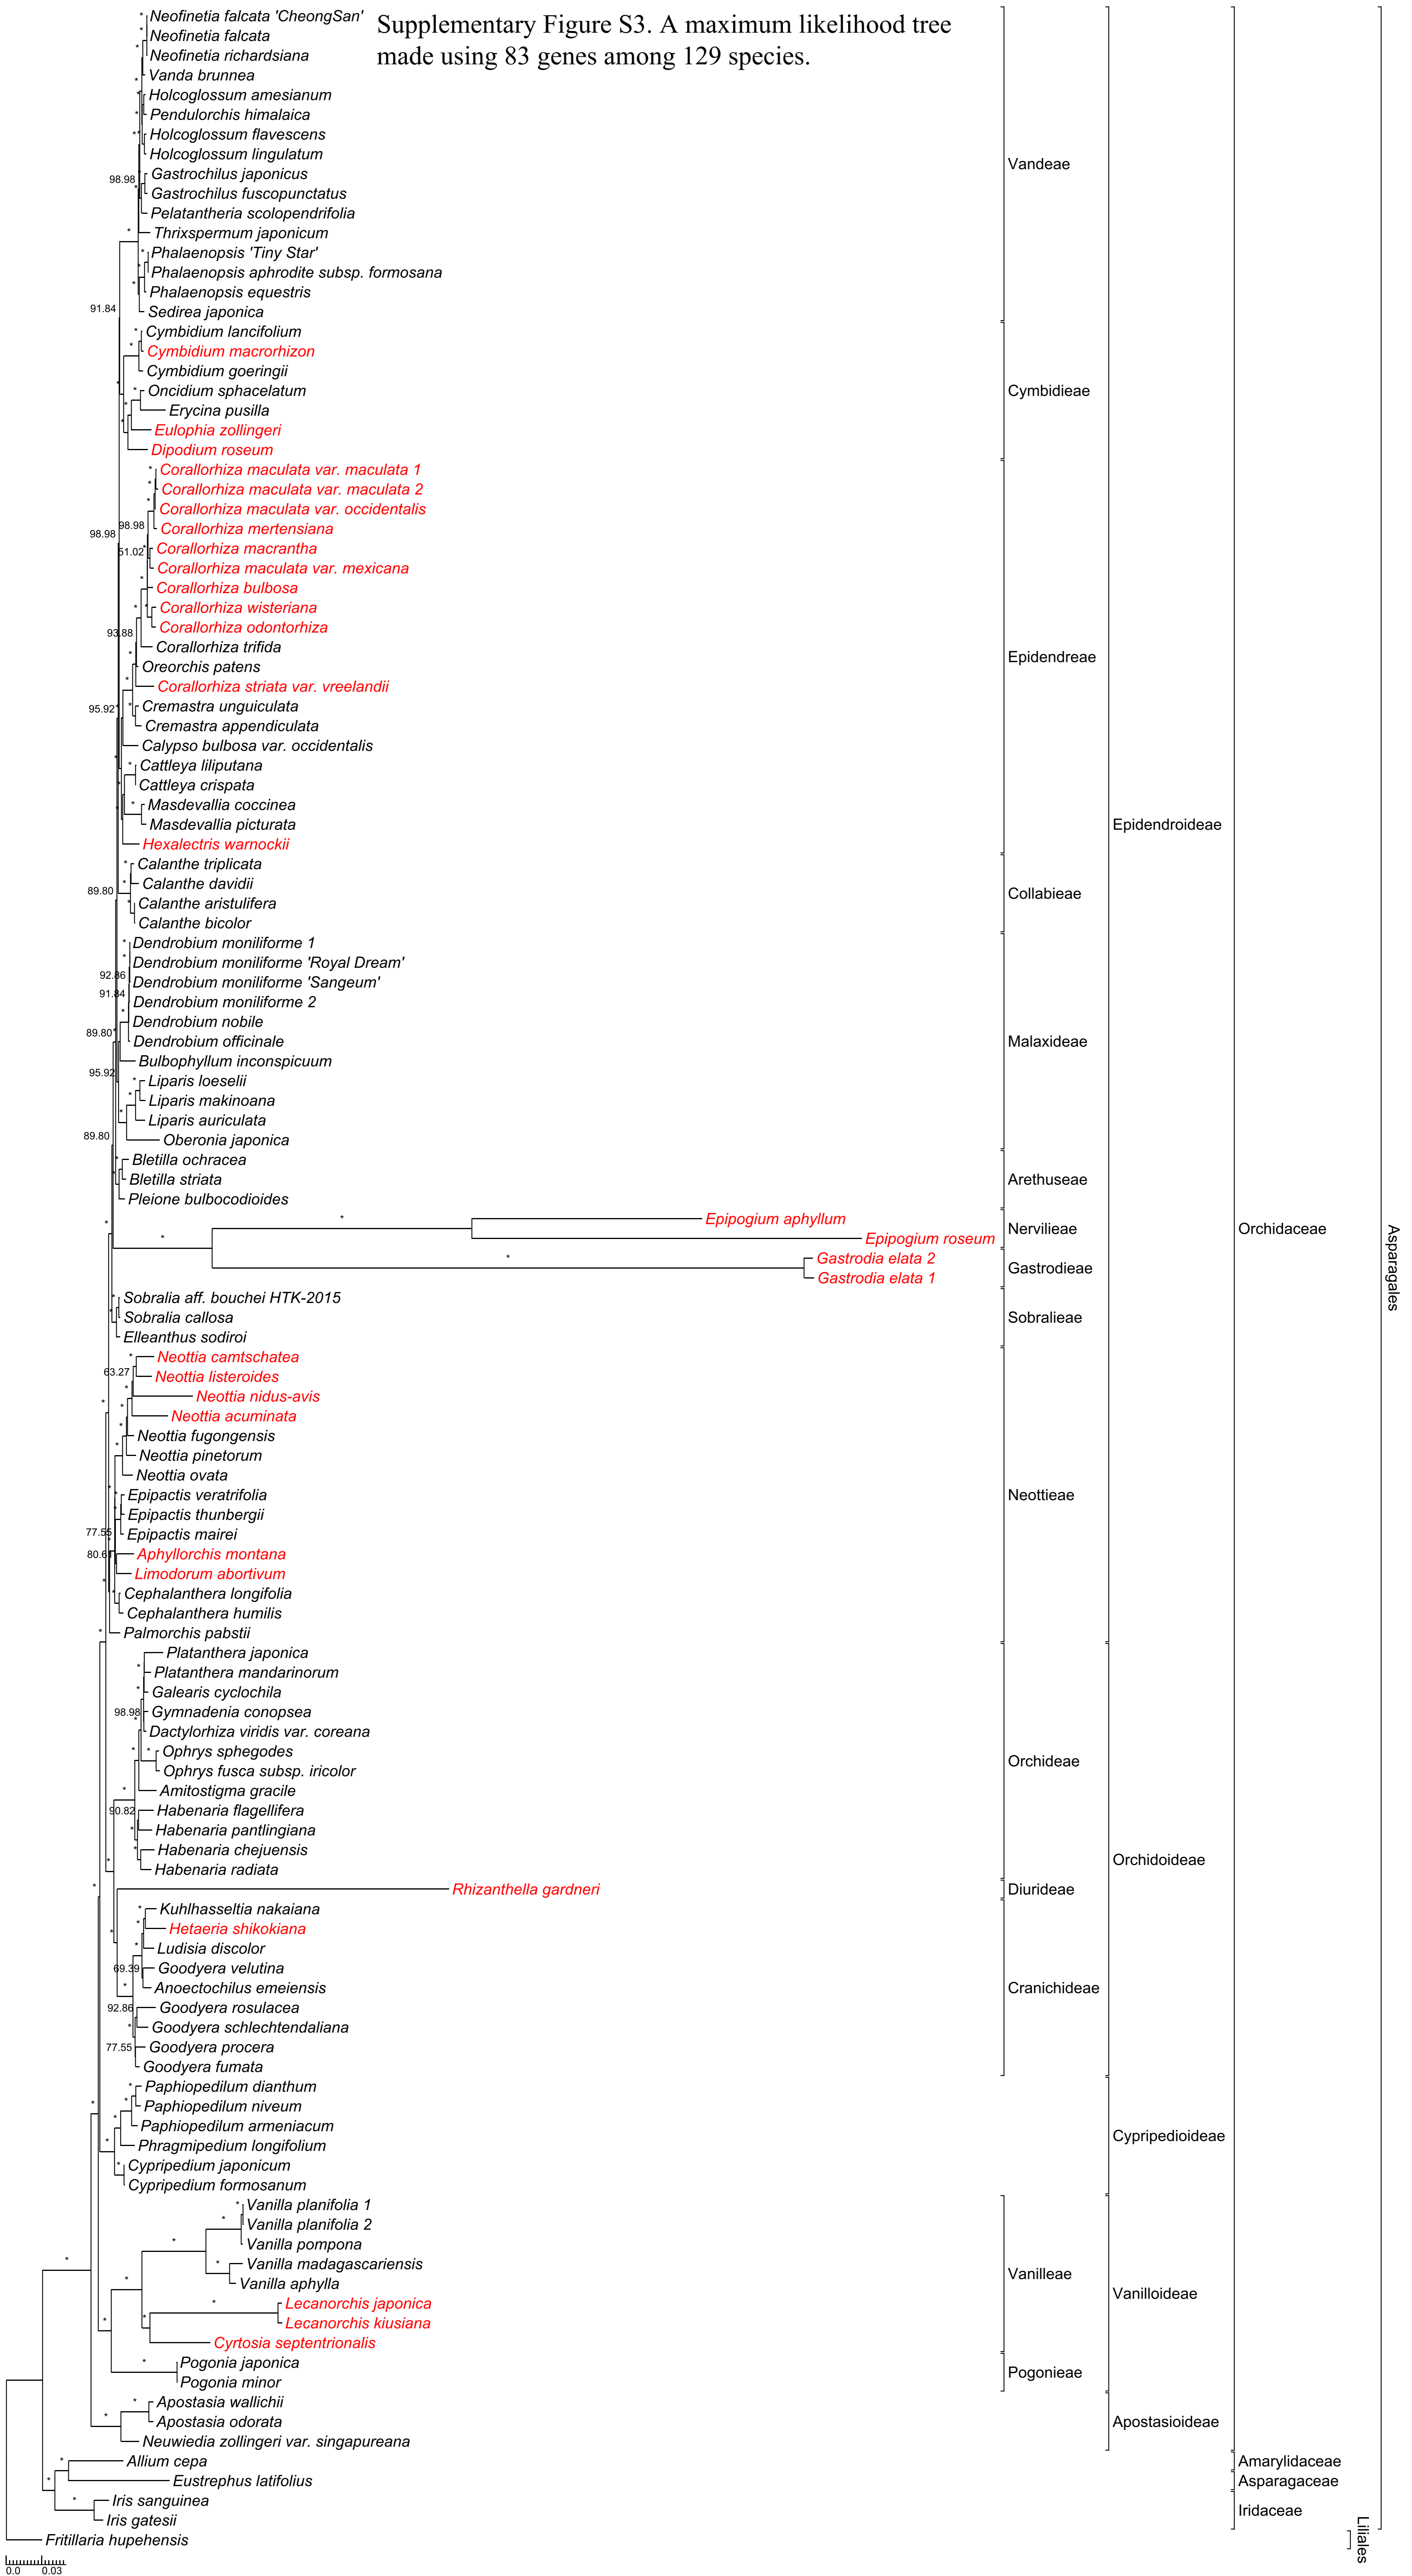

0.0 0.03

Asparagales  
Orchidaceae  
Liliales
