# Supplementary material for: Plastome Evolution and Phylogeny of Orchidaceae, With 24 New Sequences
Source: PubMed Central journal article supplement (PMC7047749; doi:10.3389/fpls.2020.00022), 2020-02-21

Supplementary Figure S4. A Bayesian inference tree made using 83 genes among 129 species.

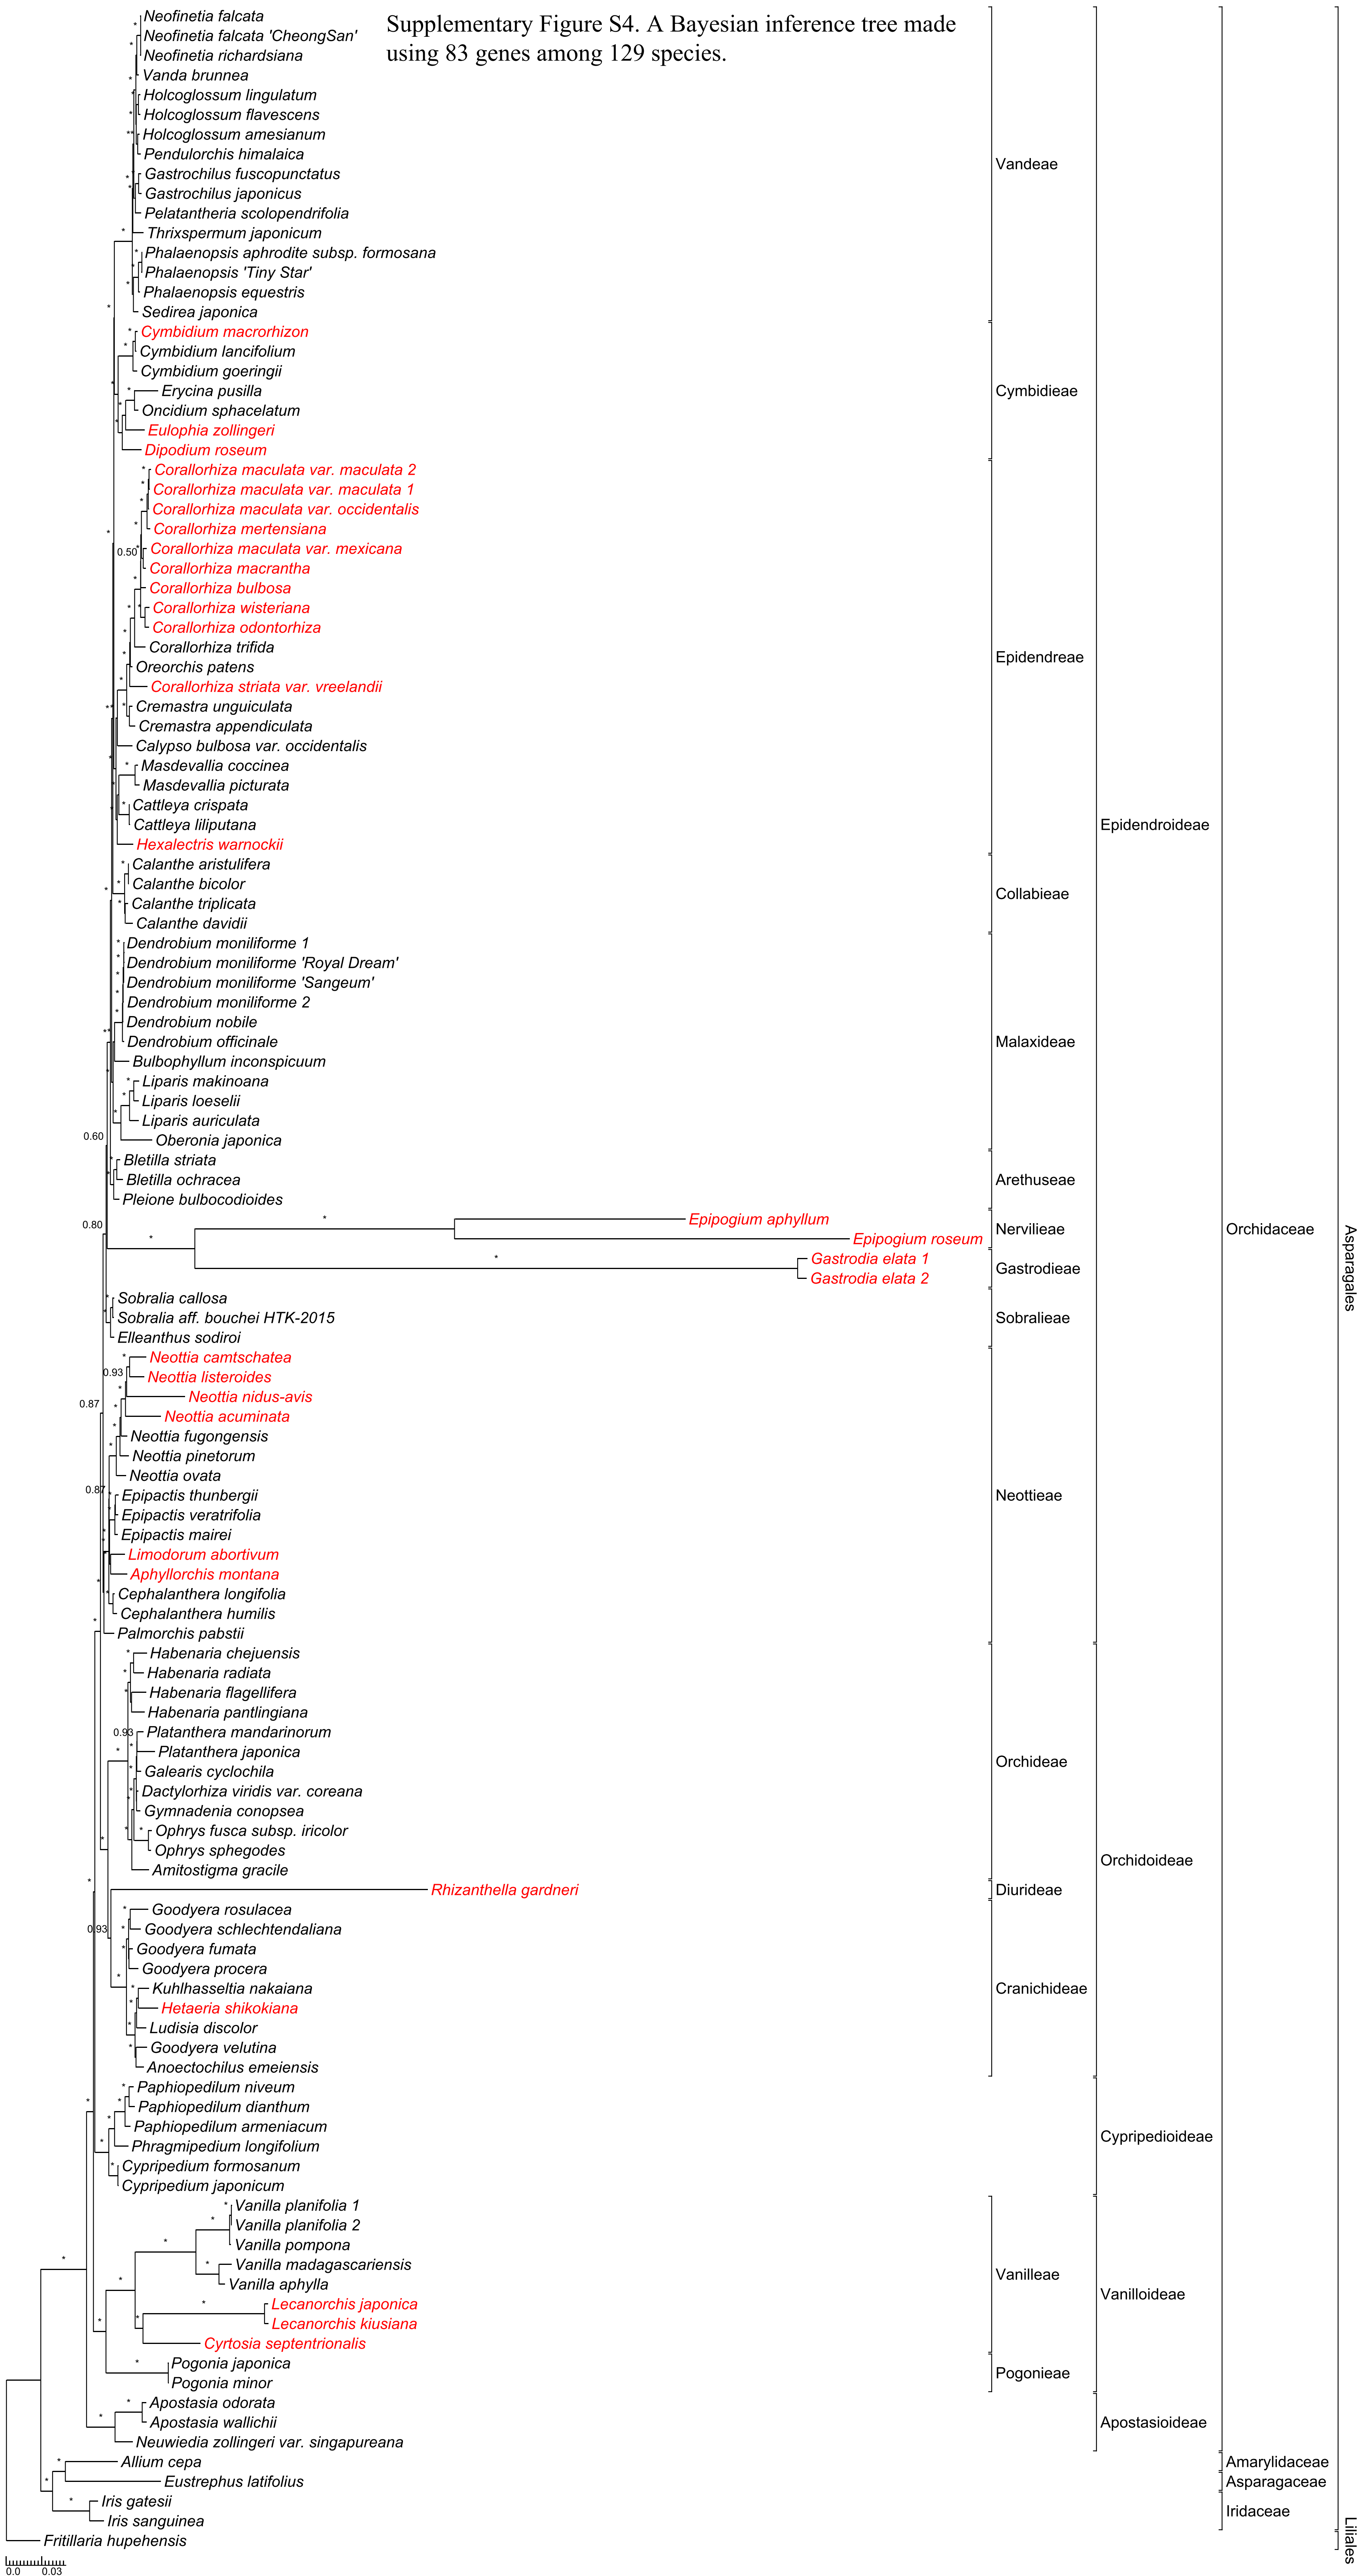

Supplement: DataSheet_4.pdf [file DataSheet_4.pdf]
