# Supplementary material for: Plastome Evolution and Phylogeny of Orchidaceae, With 24 New Sequences
Source: Front Plant Sci. 2020 Feb 21;11:22. doi: 10.3389/fpls.2020.00022 (PMC7047749; doi:10.3389/fpls.2020.00022)
Supplement: Supplementary file 1 [file DataSheet_1.pdf]

Supplementary Figure S1. Plastome circle map of 24  
newly sequences Orchidaceae species.

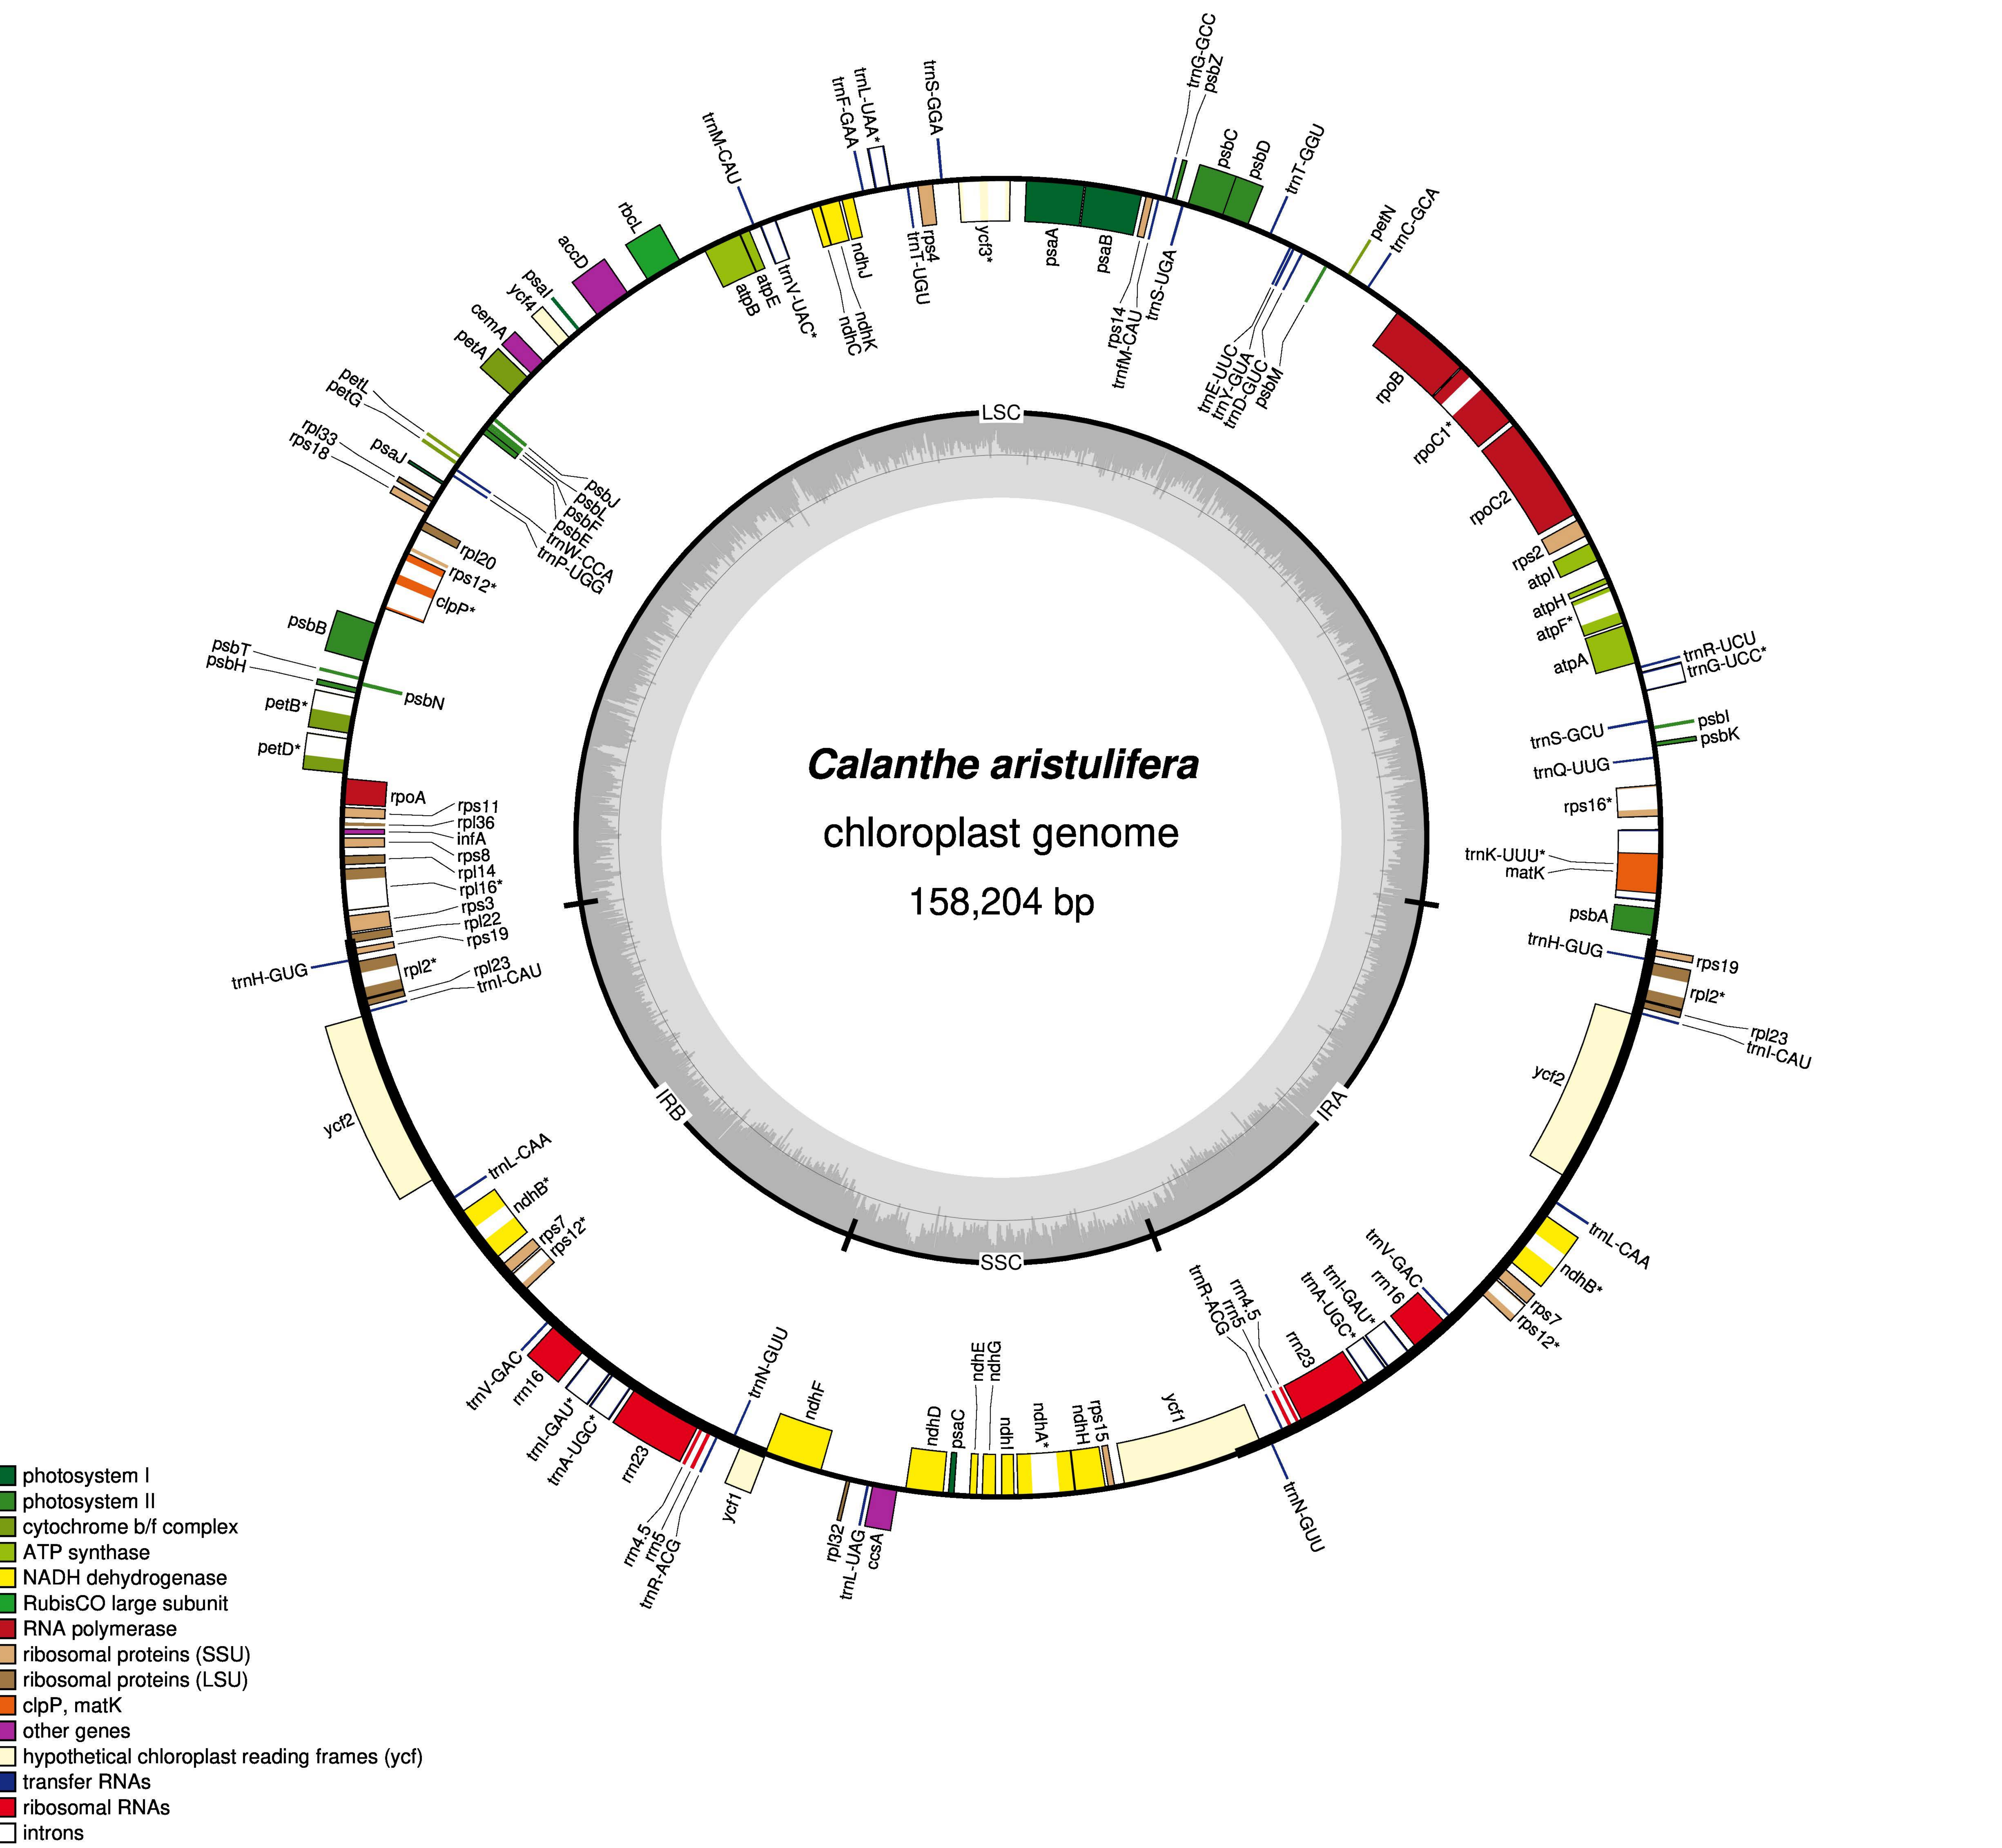

# Epidendroideae

## Collabieae

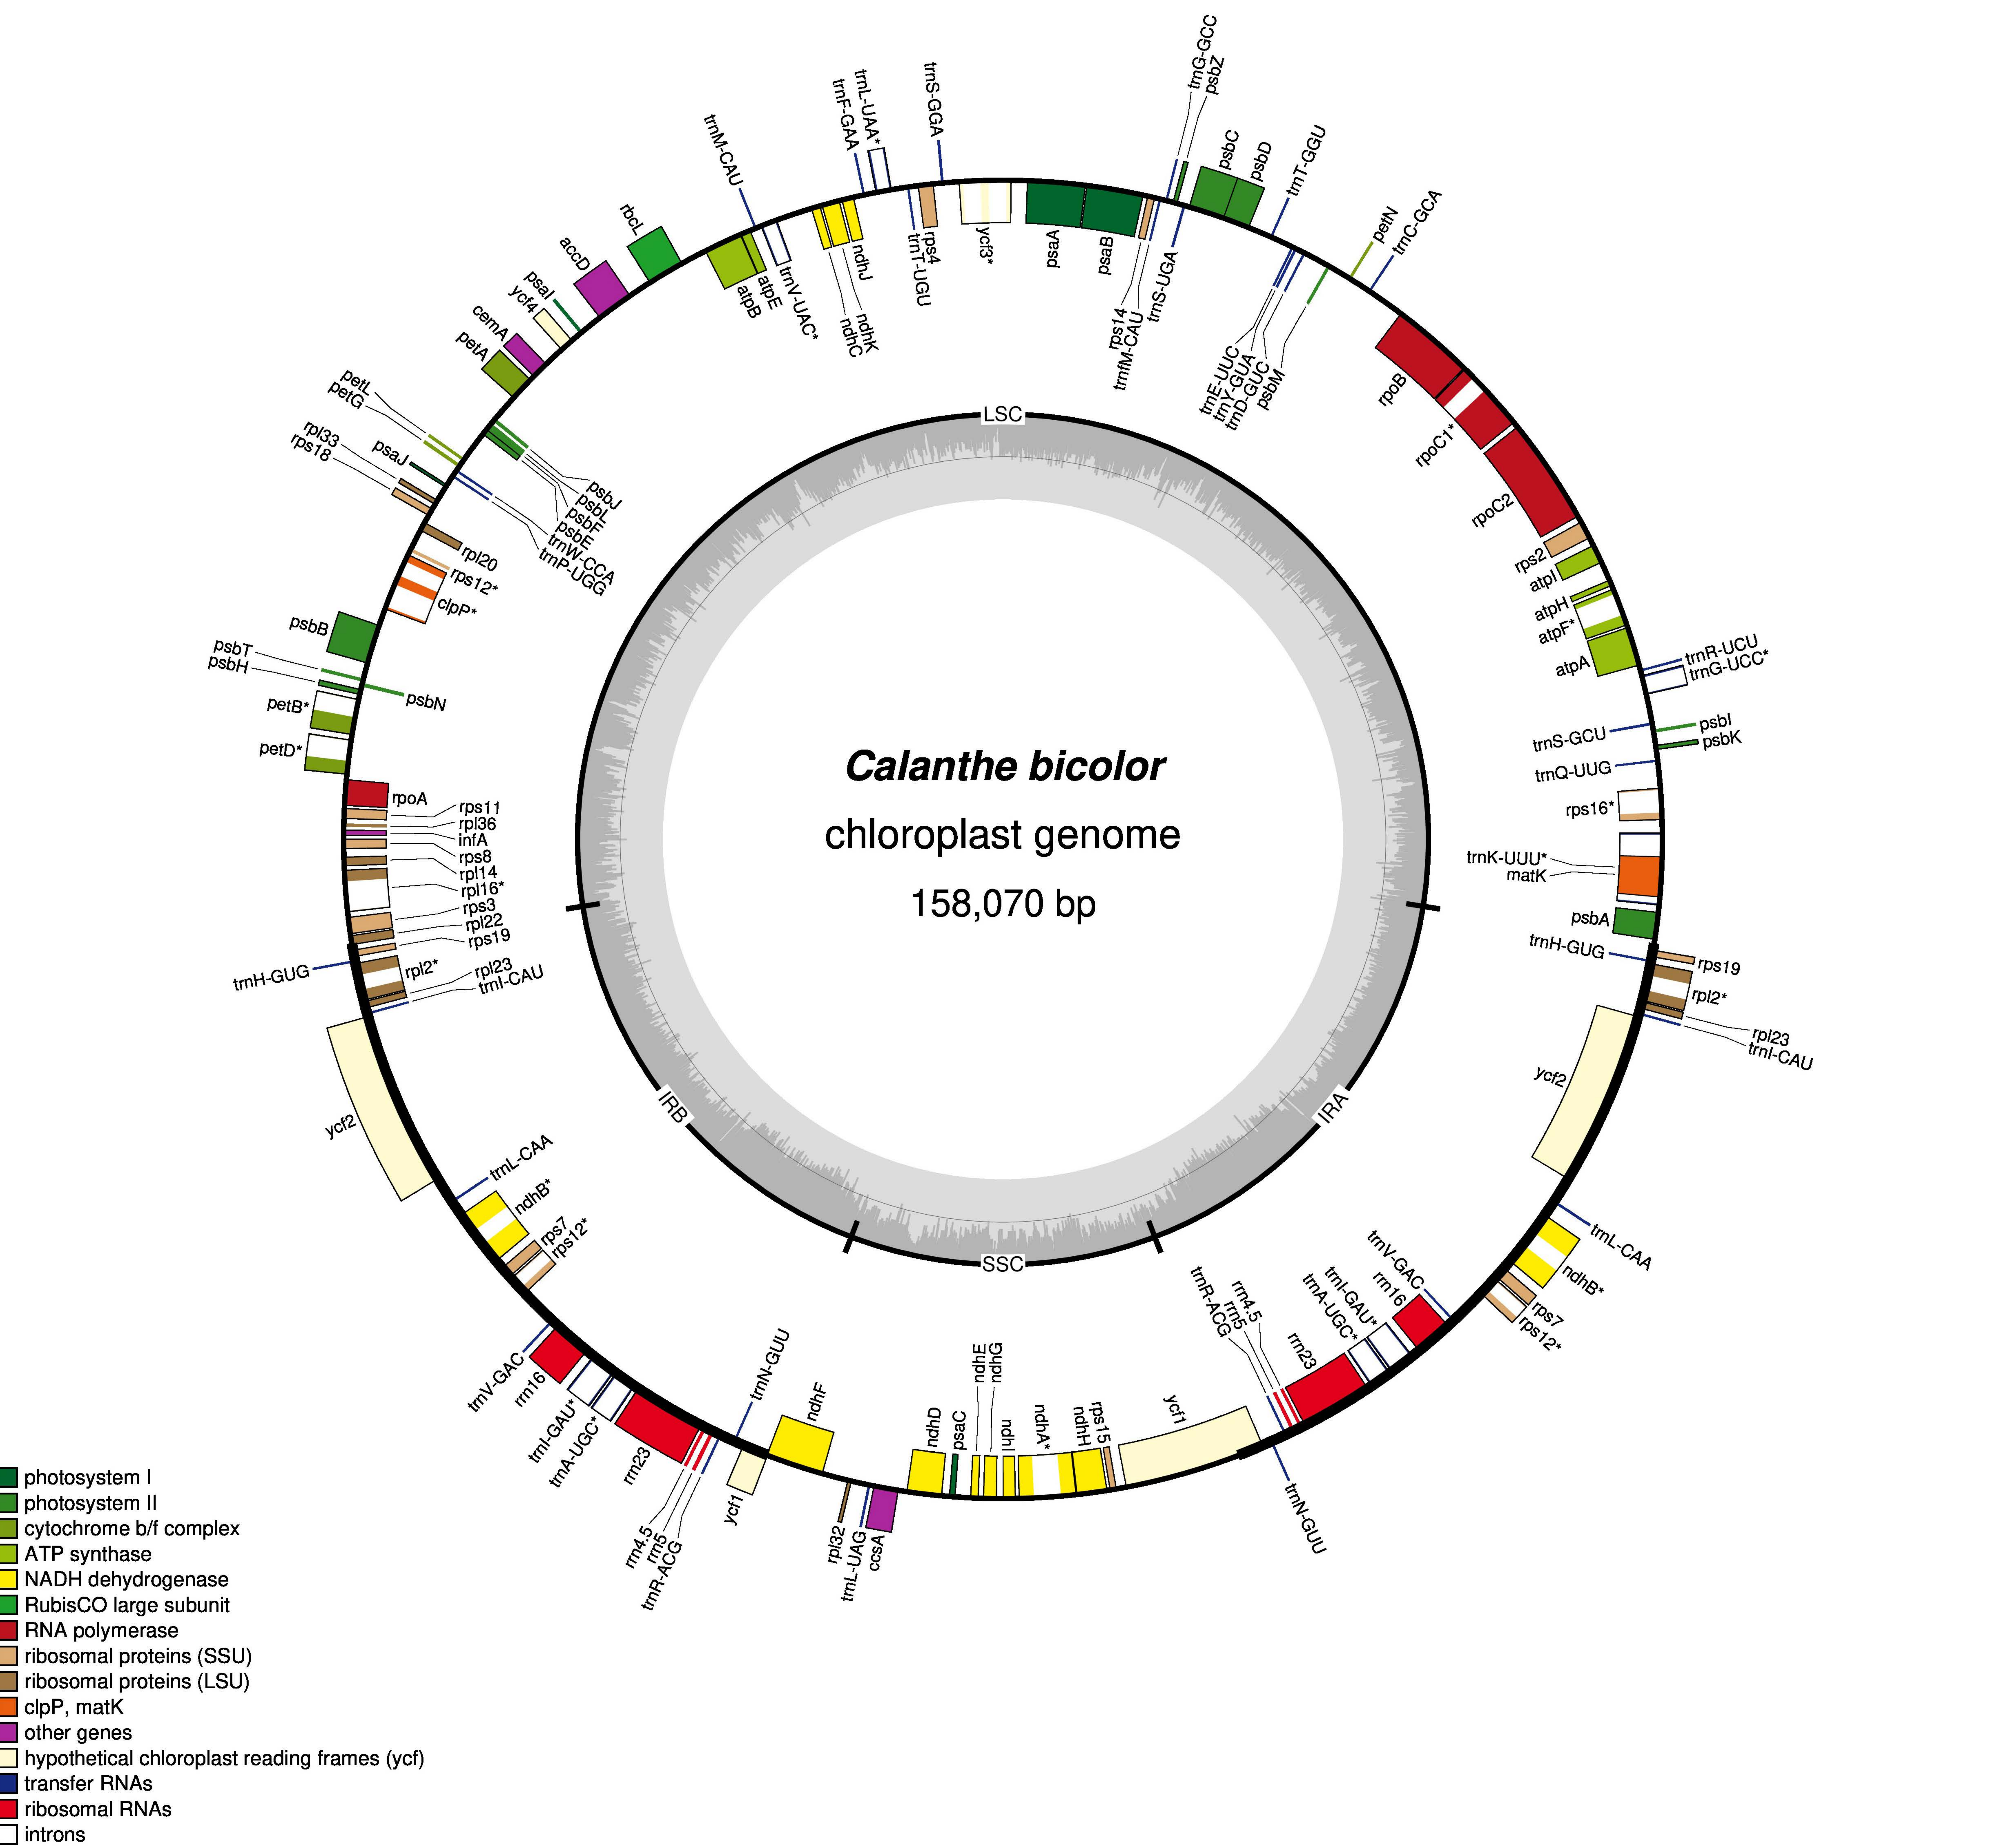

# Epidendroideae

## Cymbidieae

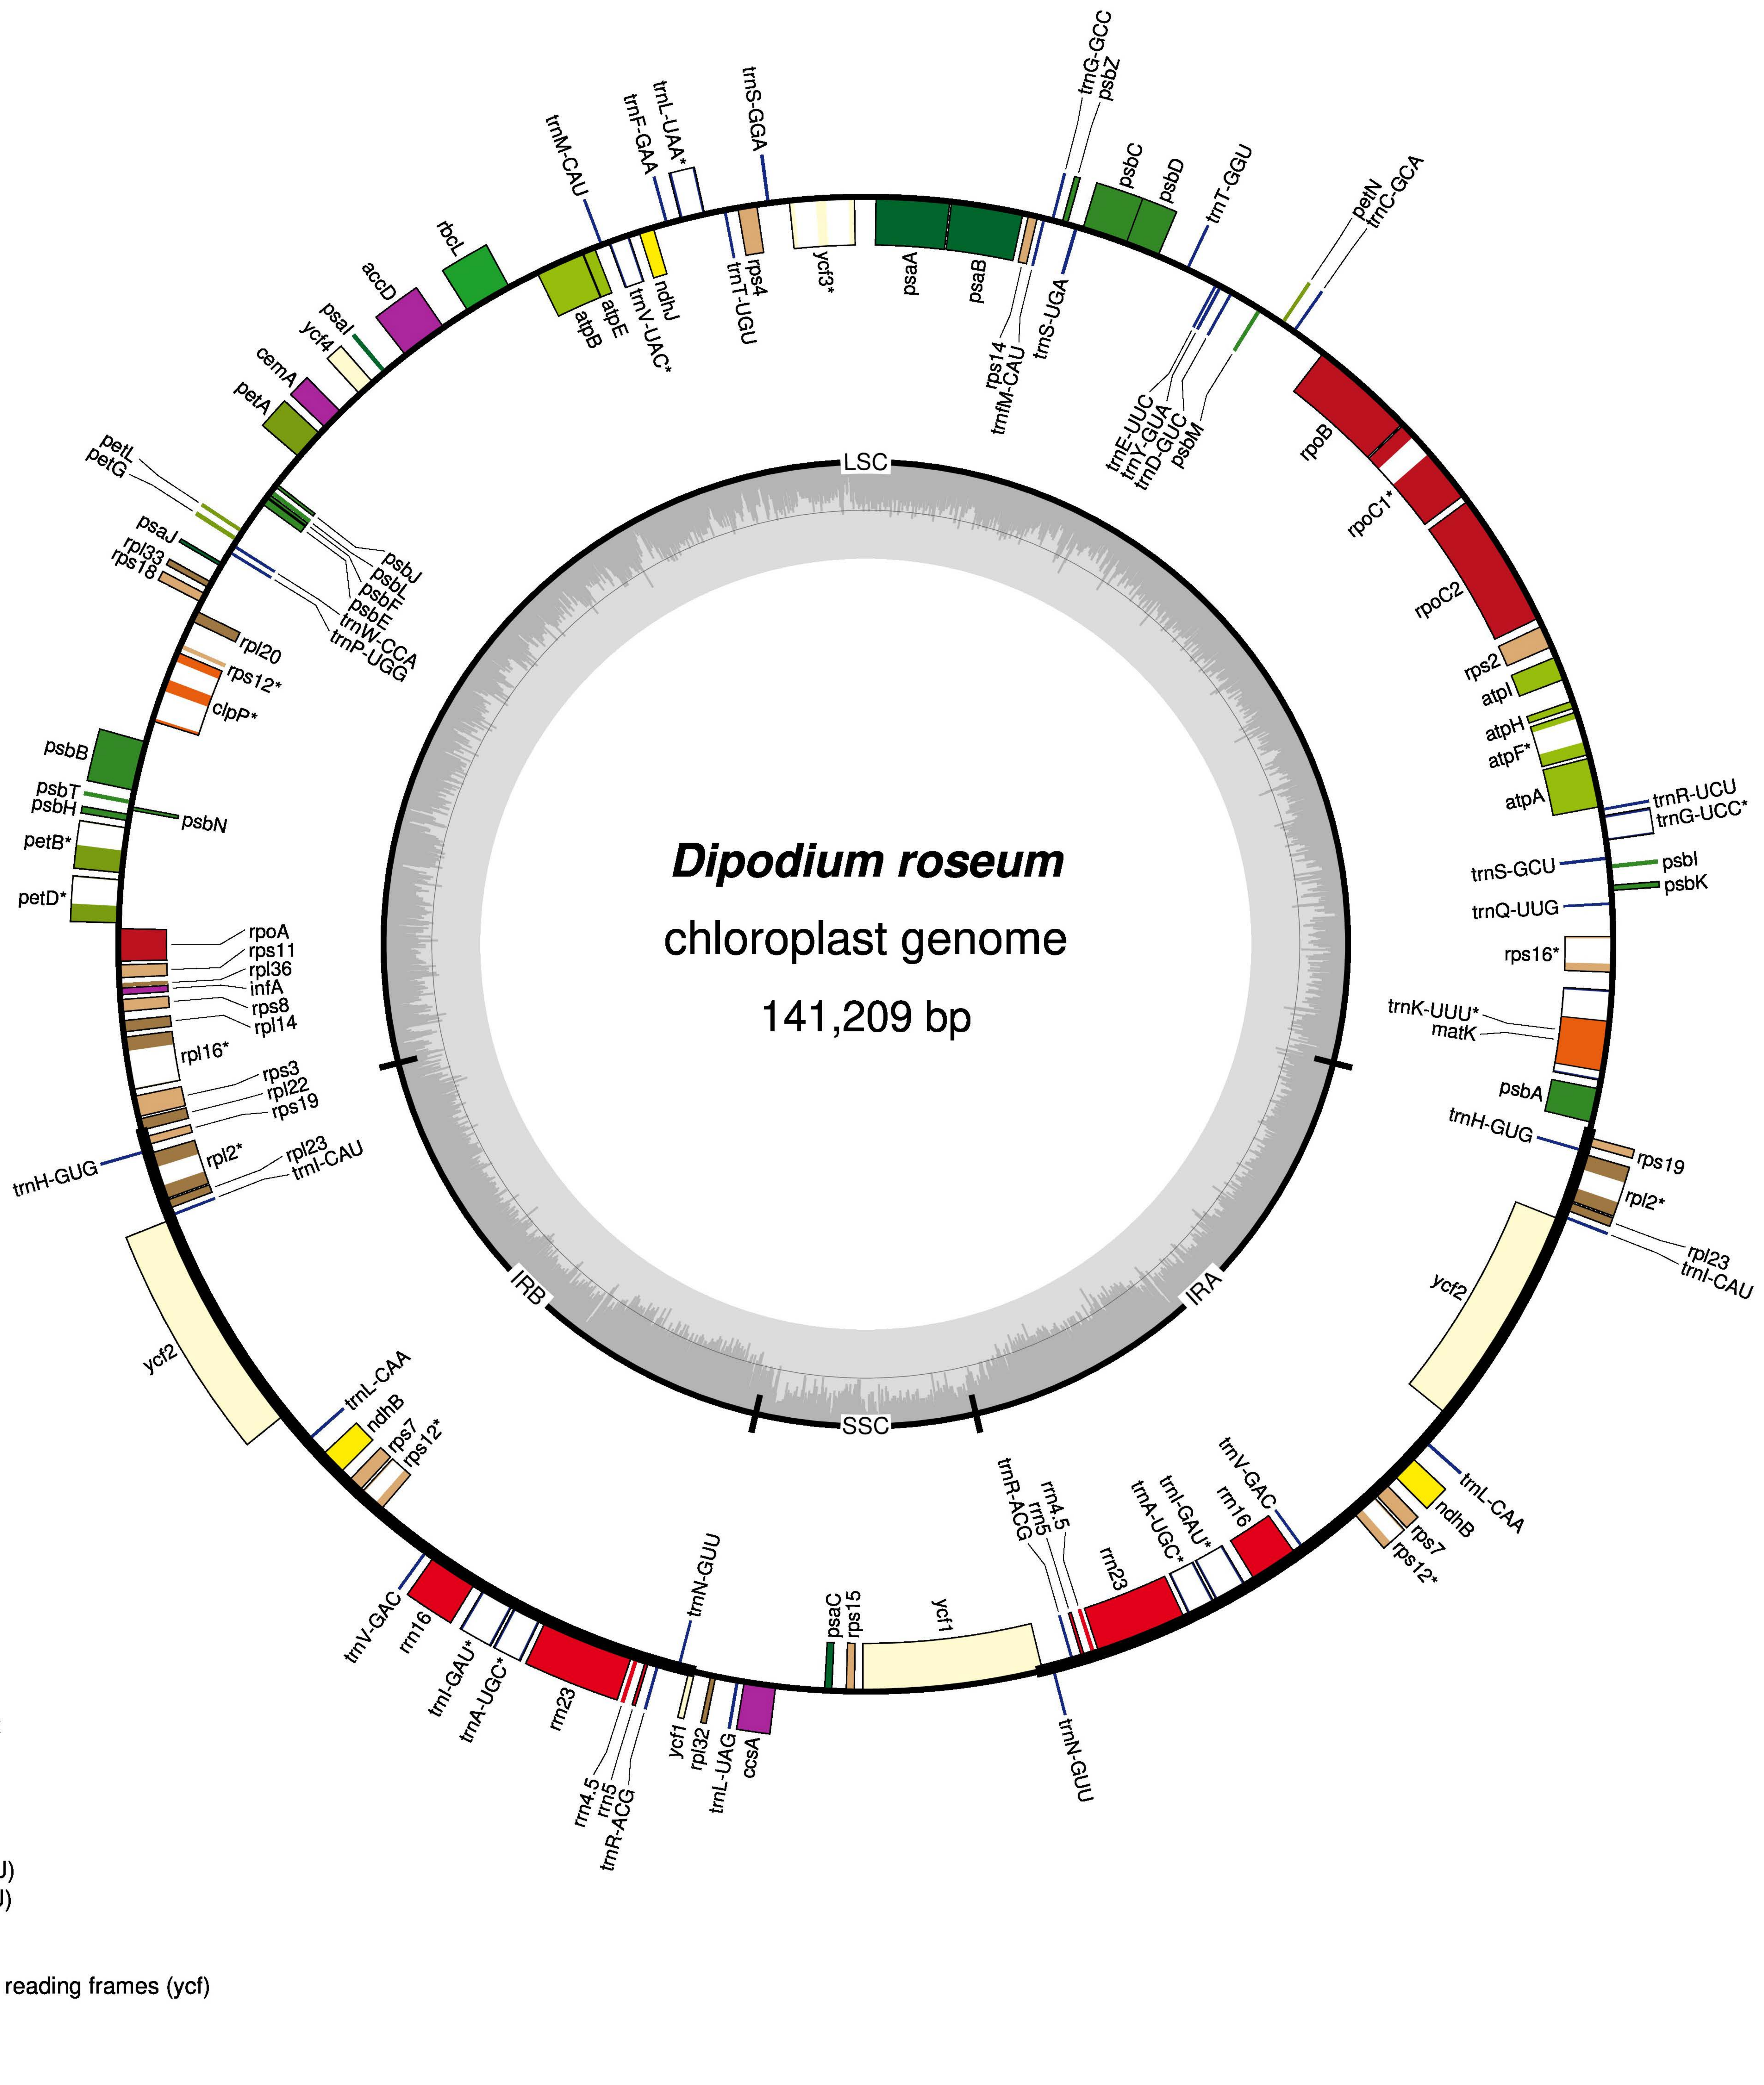

Epidendroideae  
Epidendreae

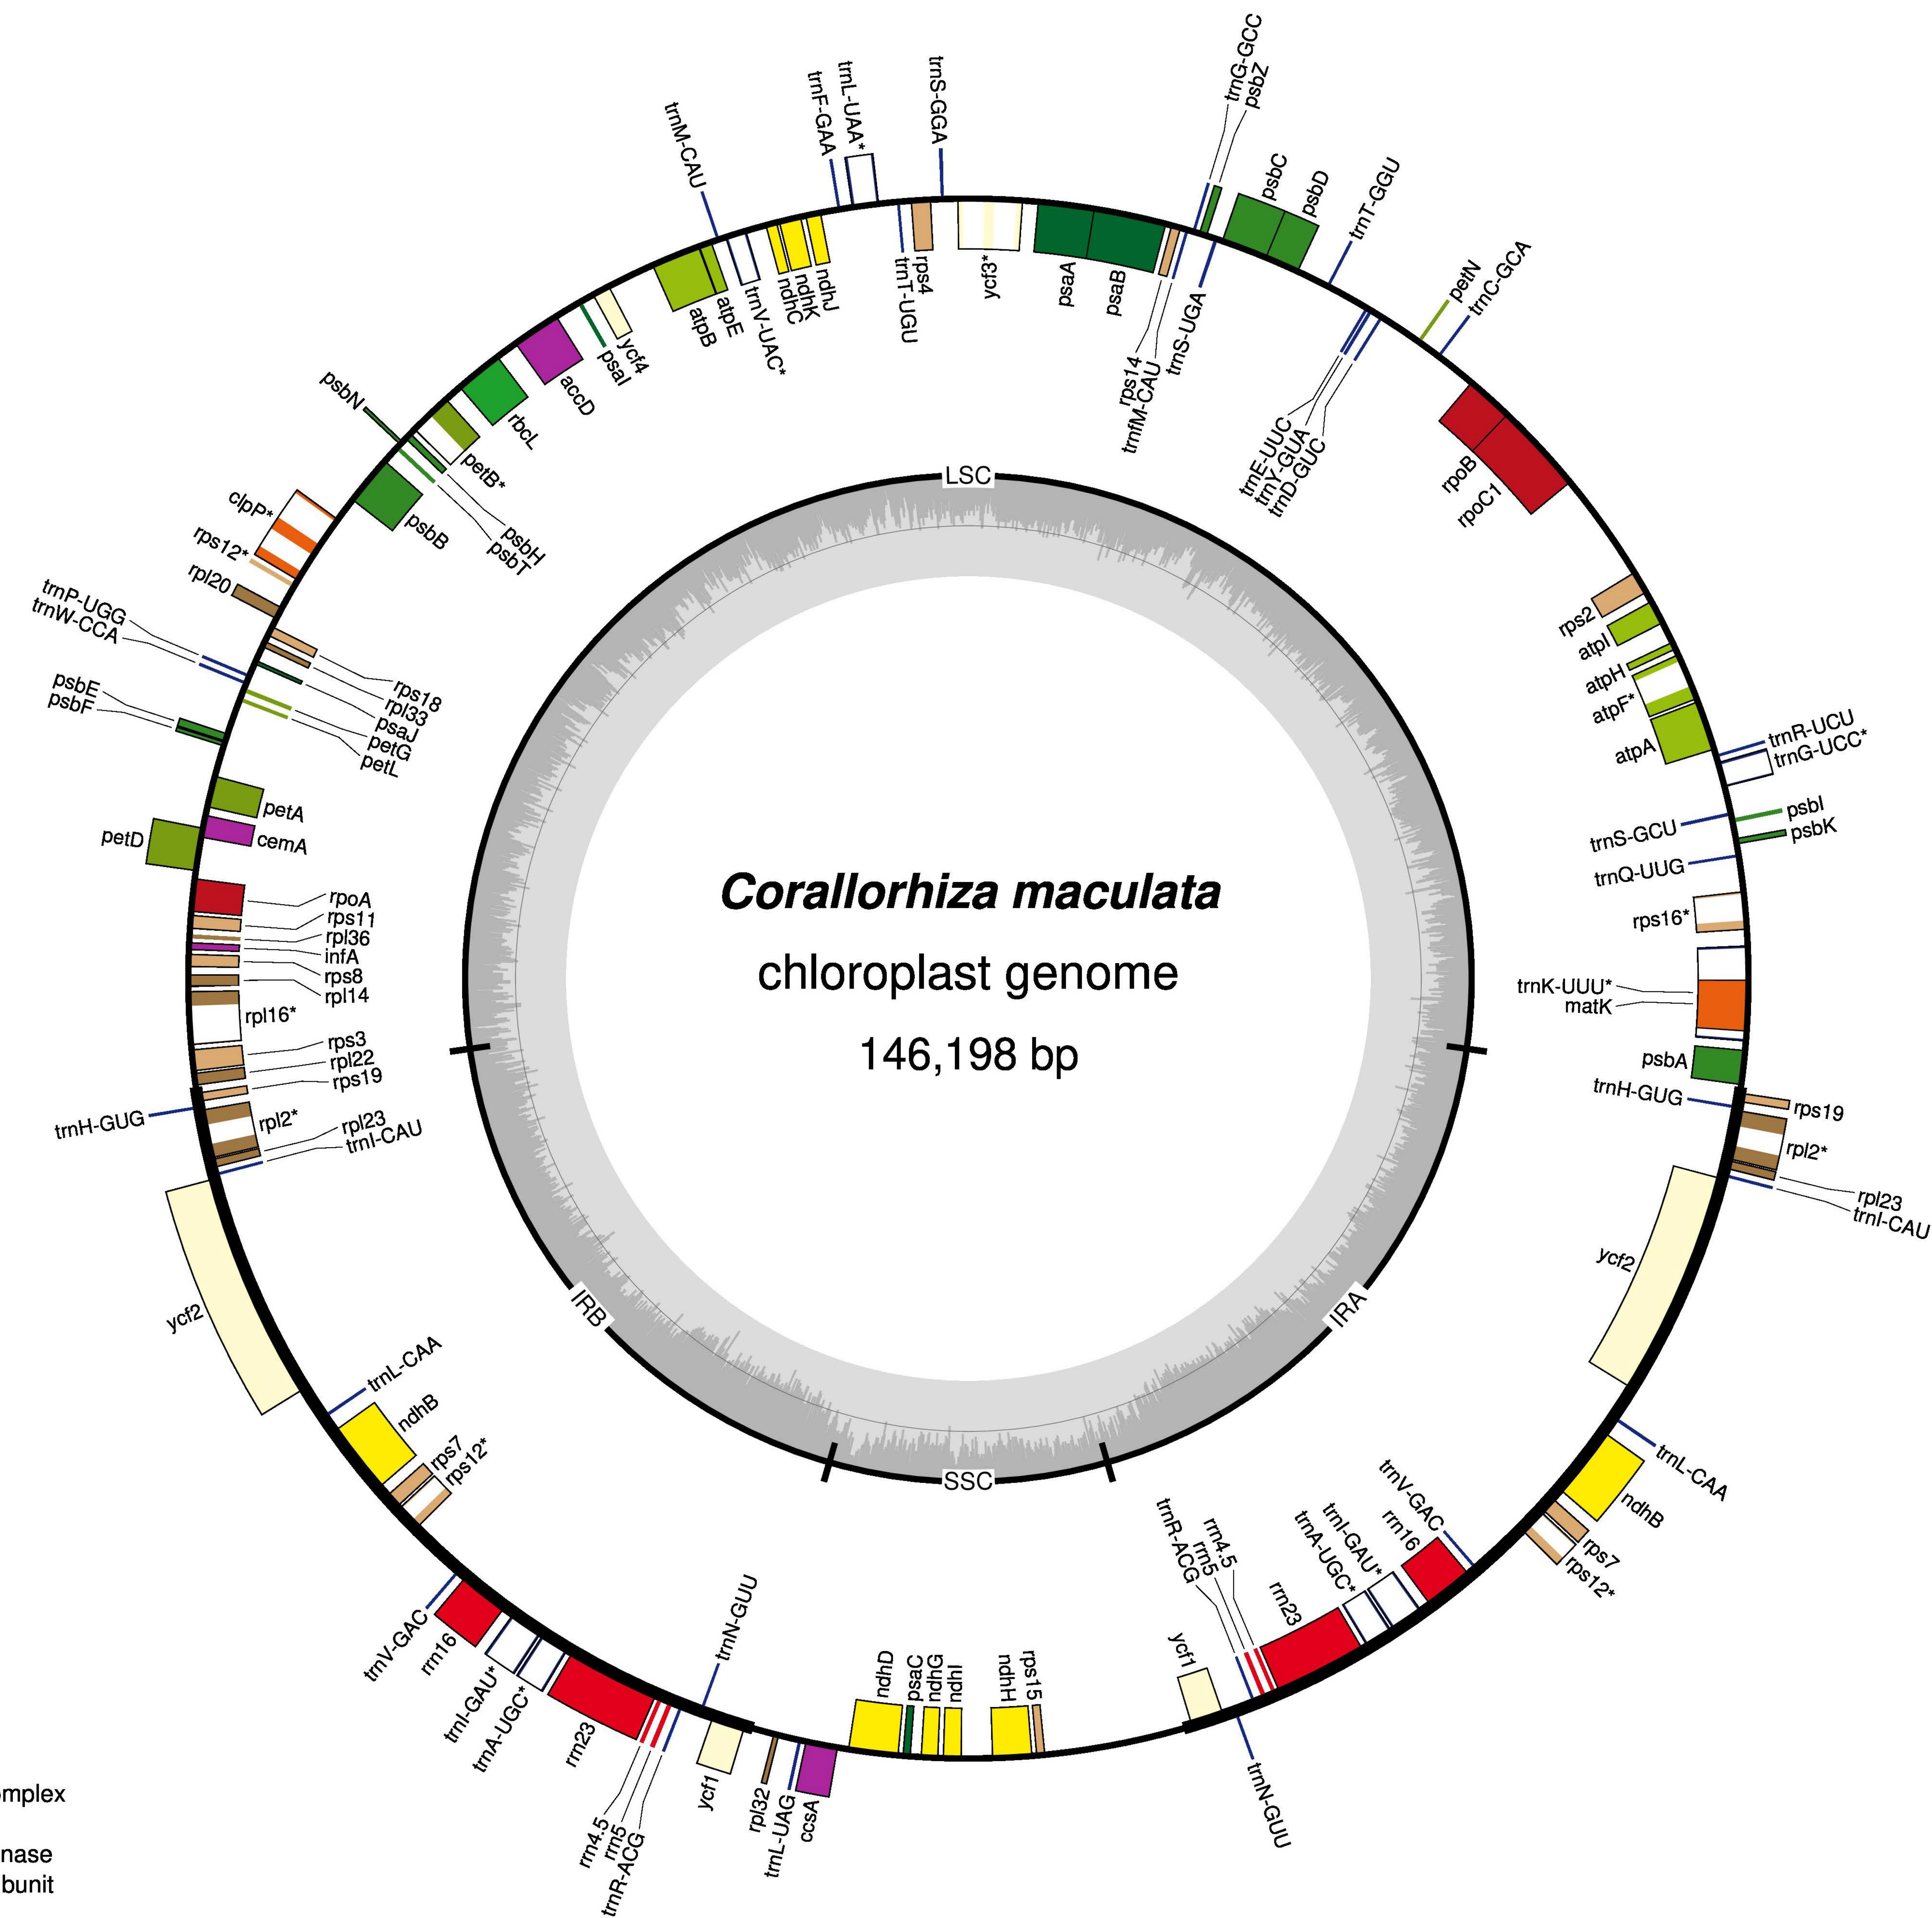

- 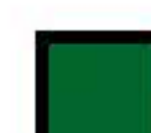 photosystem I
- 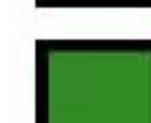 photosystem II
- 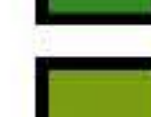 cytochrome b/f complex
- 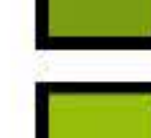 ATP synthase
- 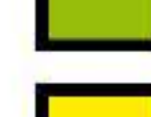 NADH dehydrogenase
- 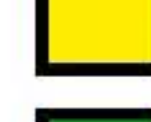 RubisCO large subunit
- 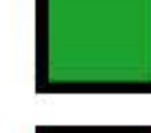 RNA polymerase
- 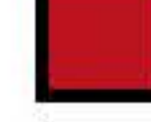 ribosomal proteins (SSU)
- 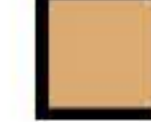 ribosomal proteins (LSU)
- 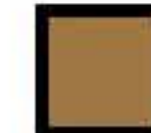 clpP, matK
- 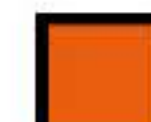 other genes
- 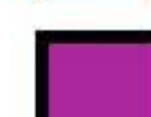 hypothetical chloroplast reading frames (ycf)
- 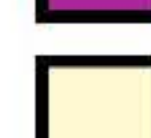 transfer RNAs
- 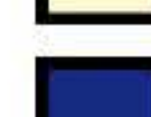 ribosomal RNAs
- 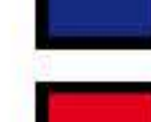 introns

Epidendroideae  
Epidendreae

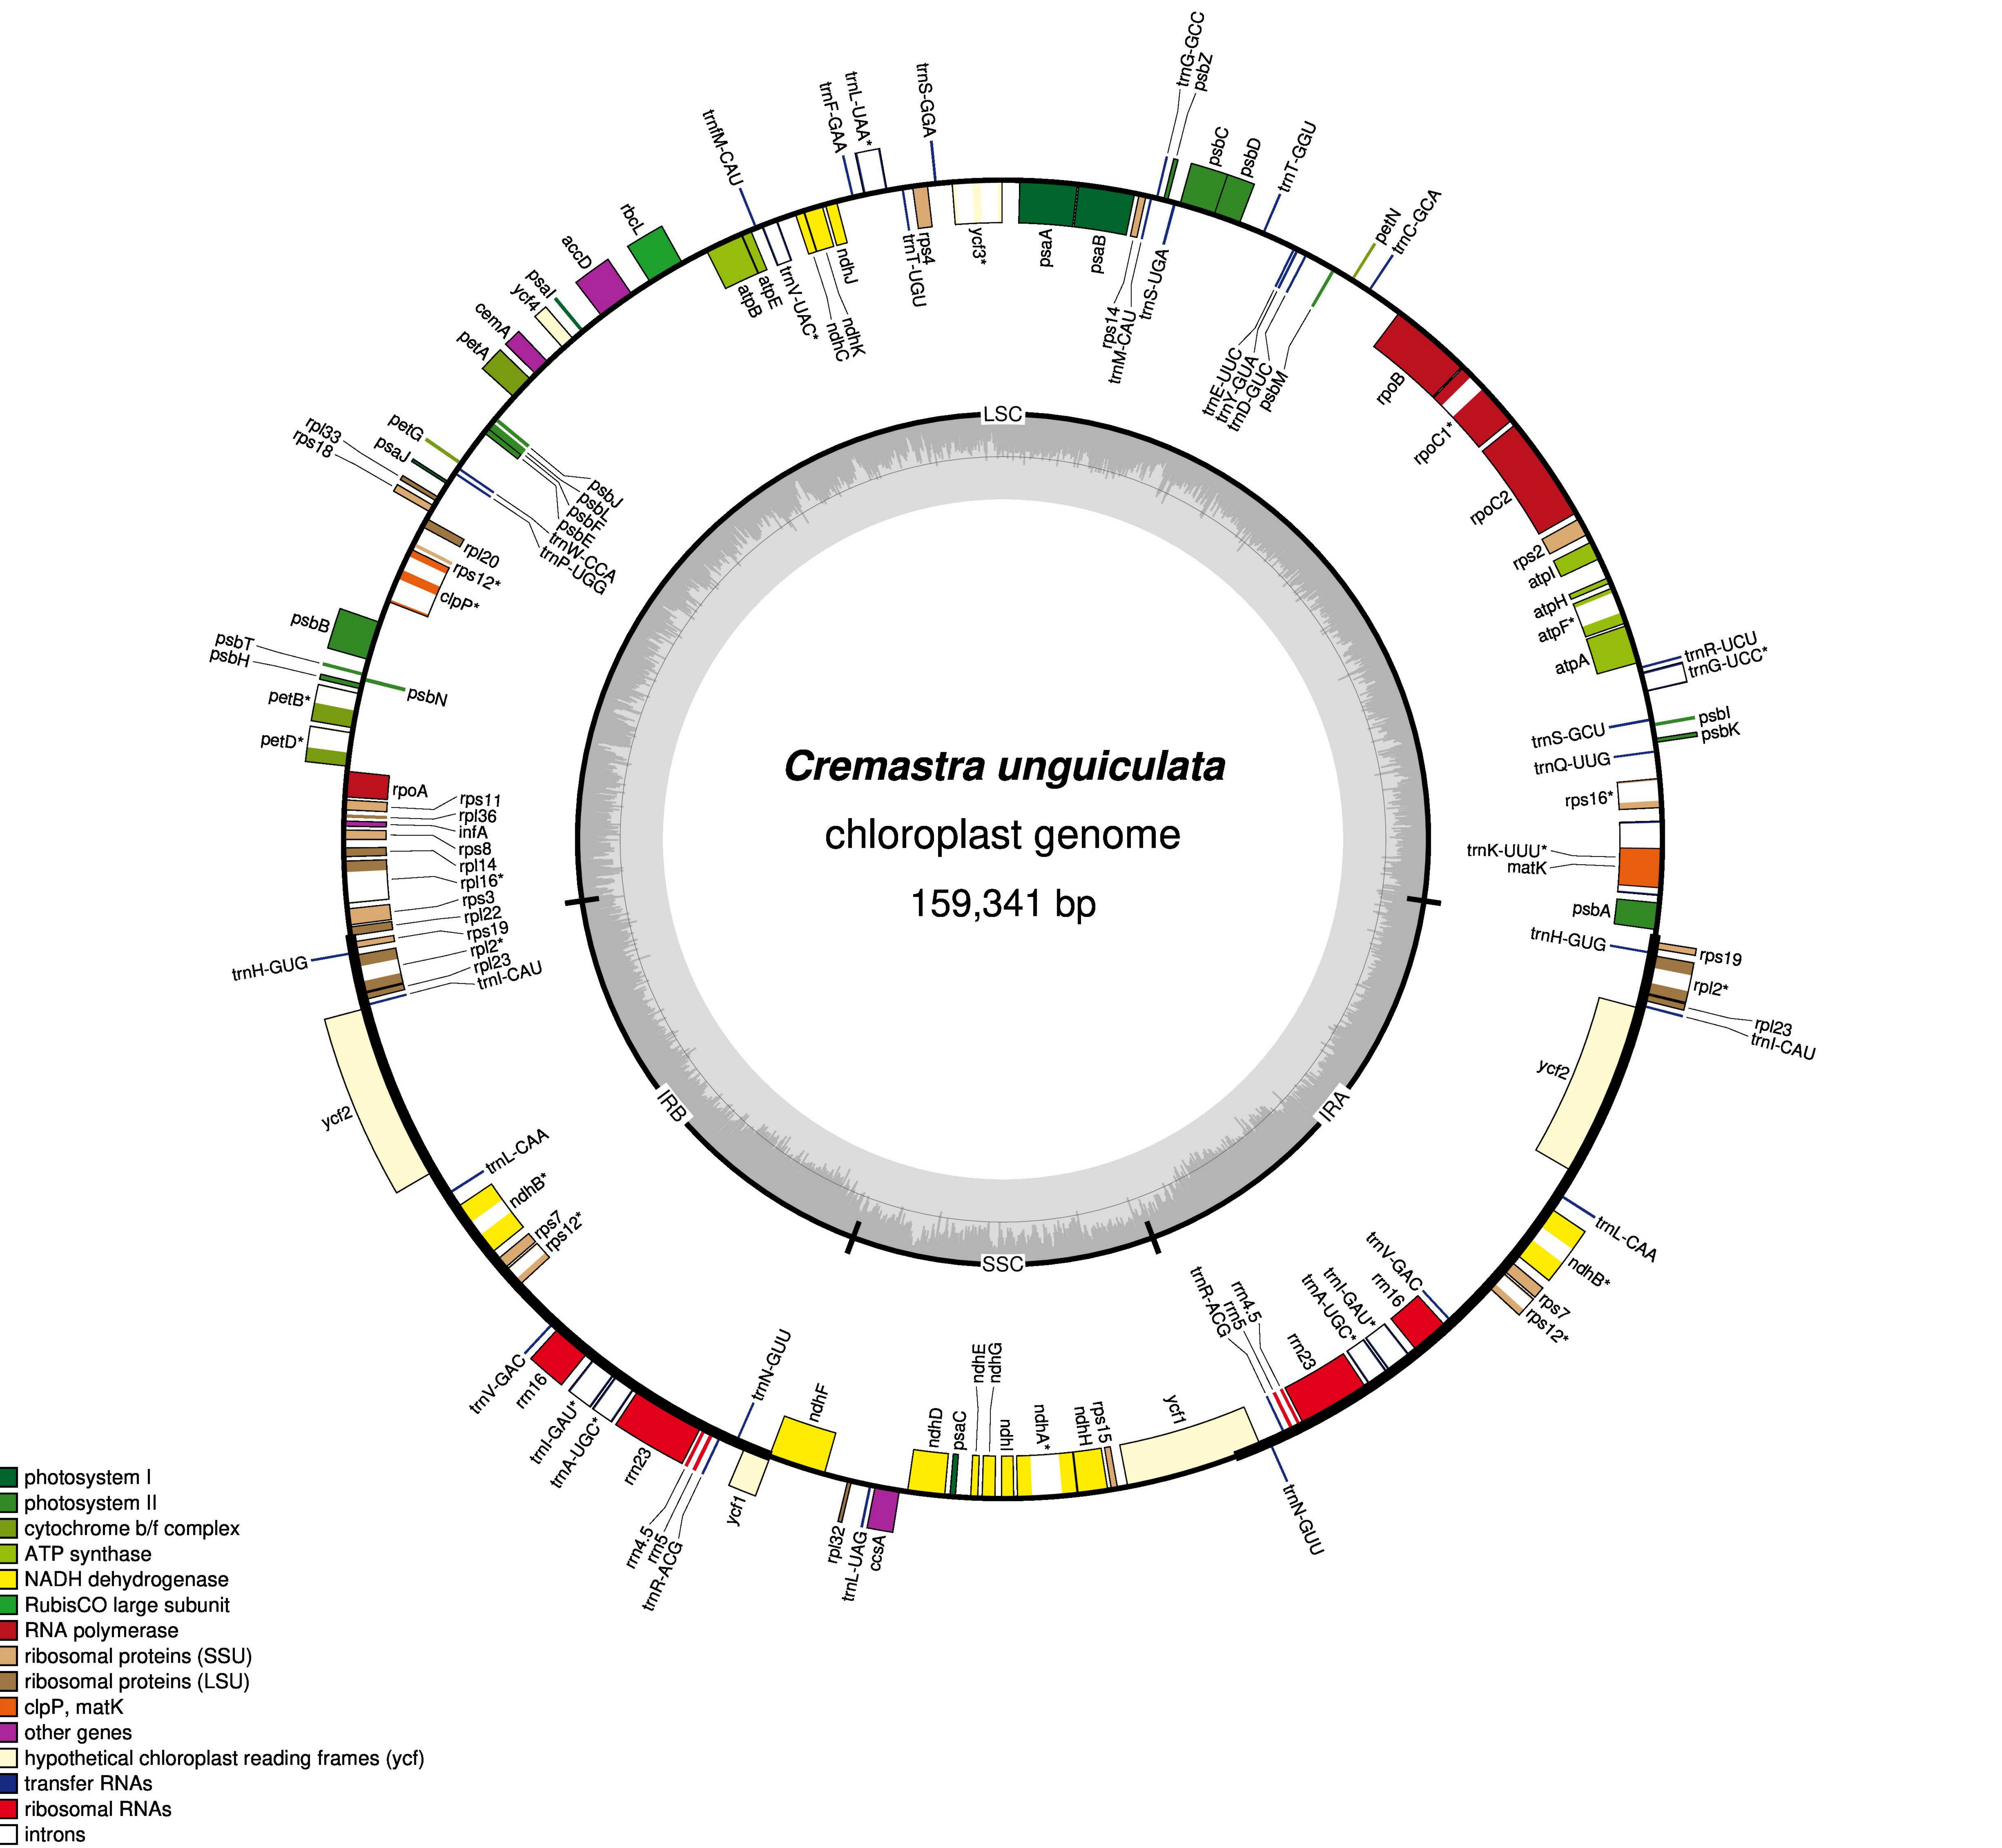

Epidendroideae  
Epidendreae

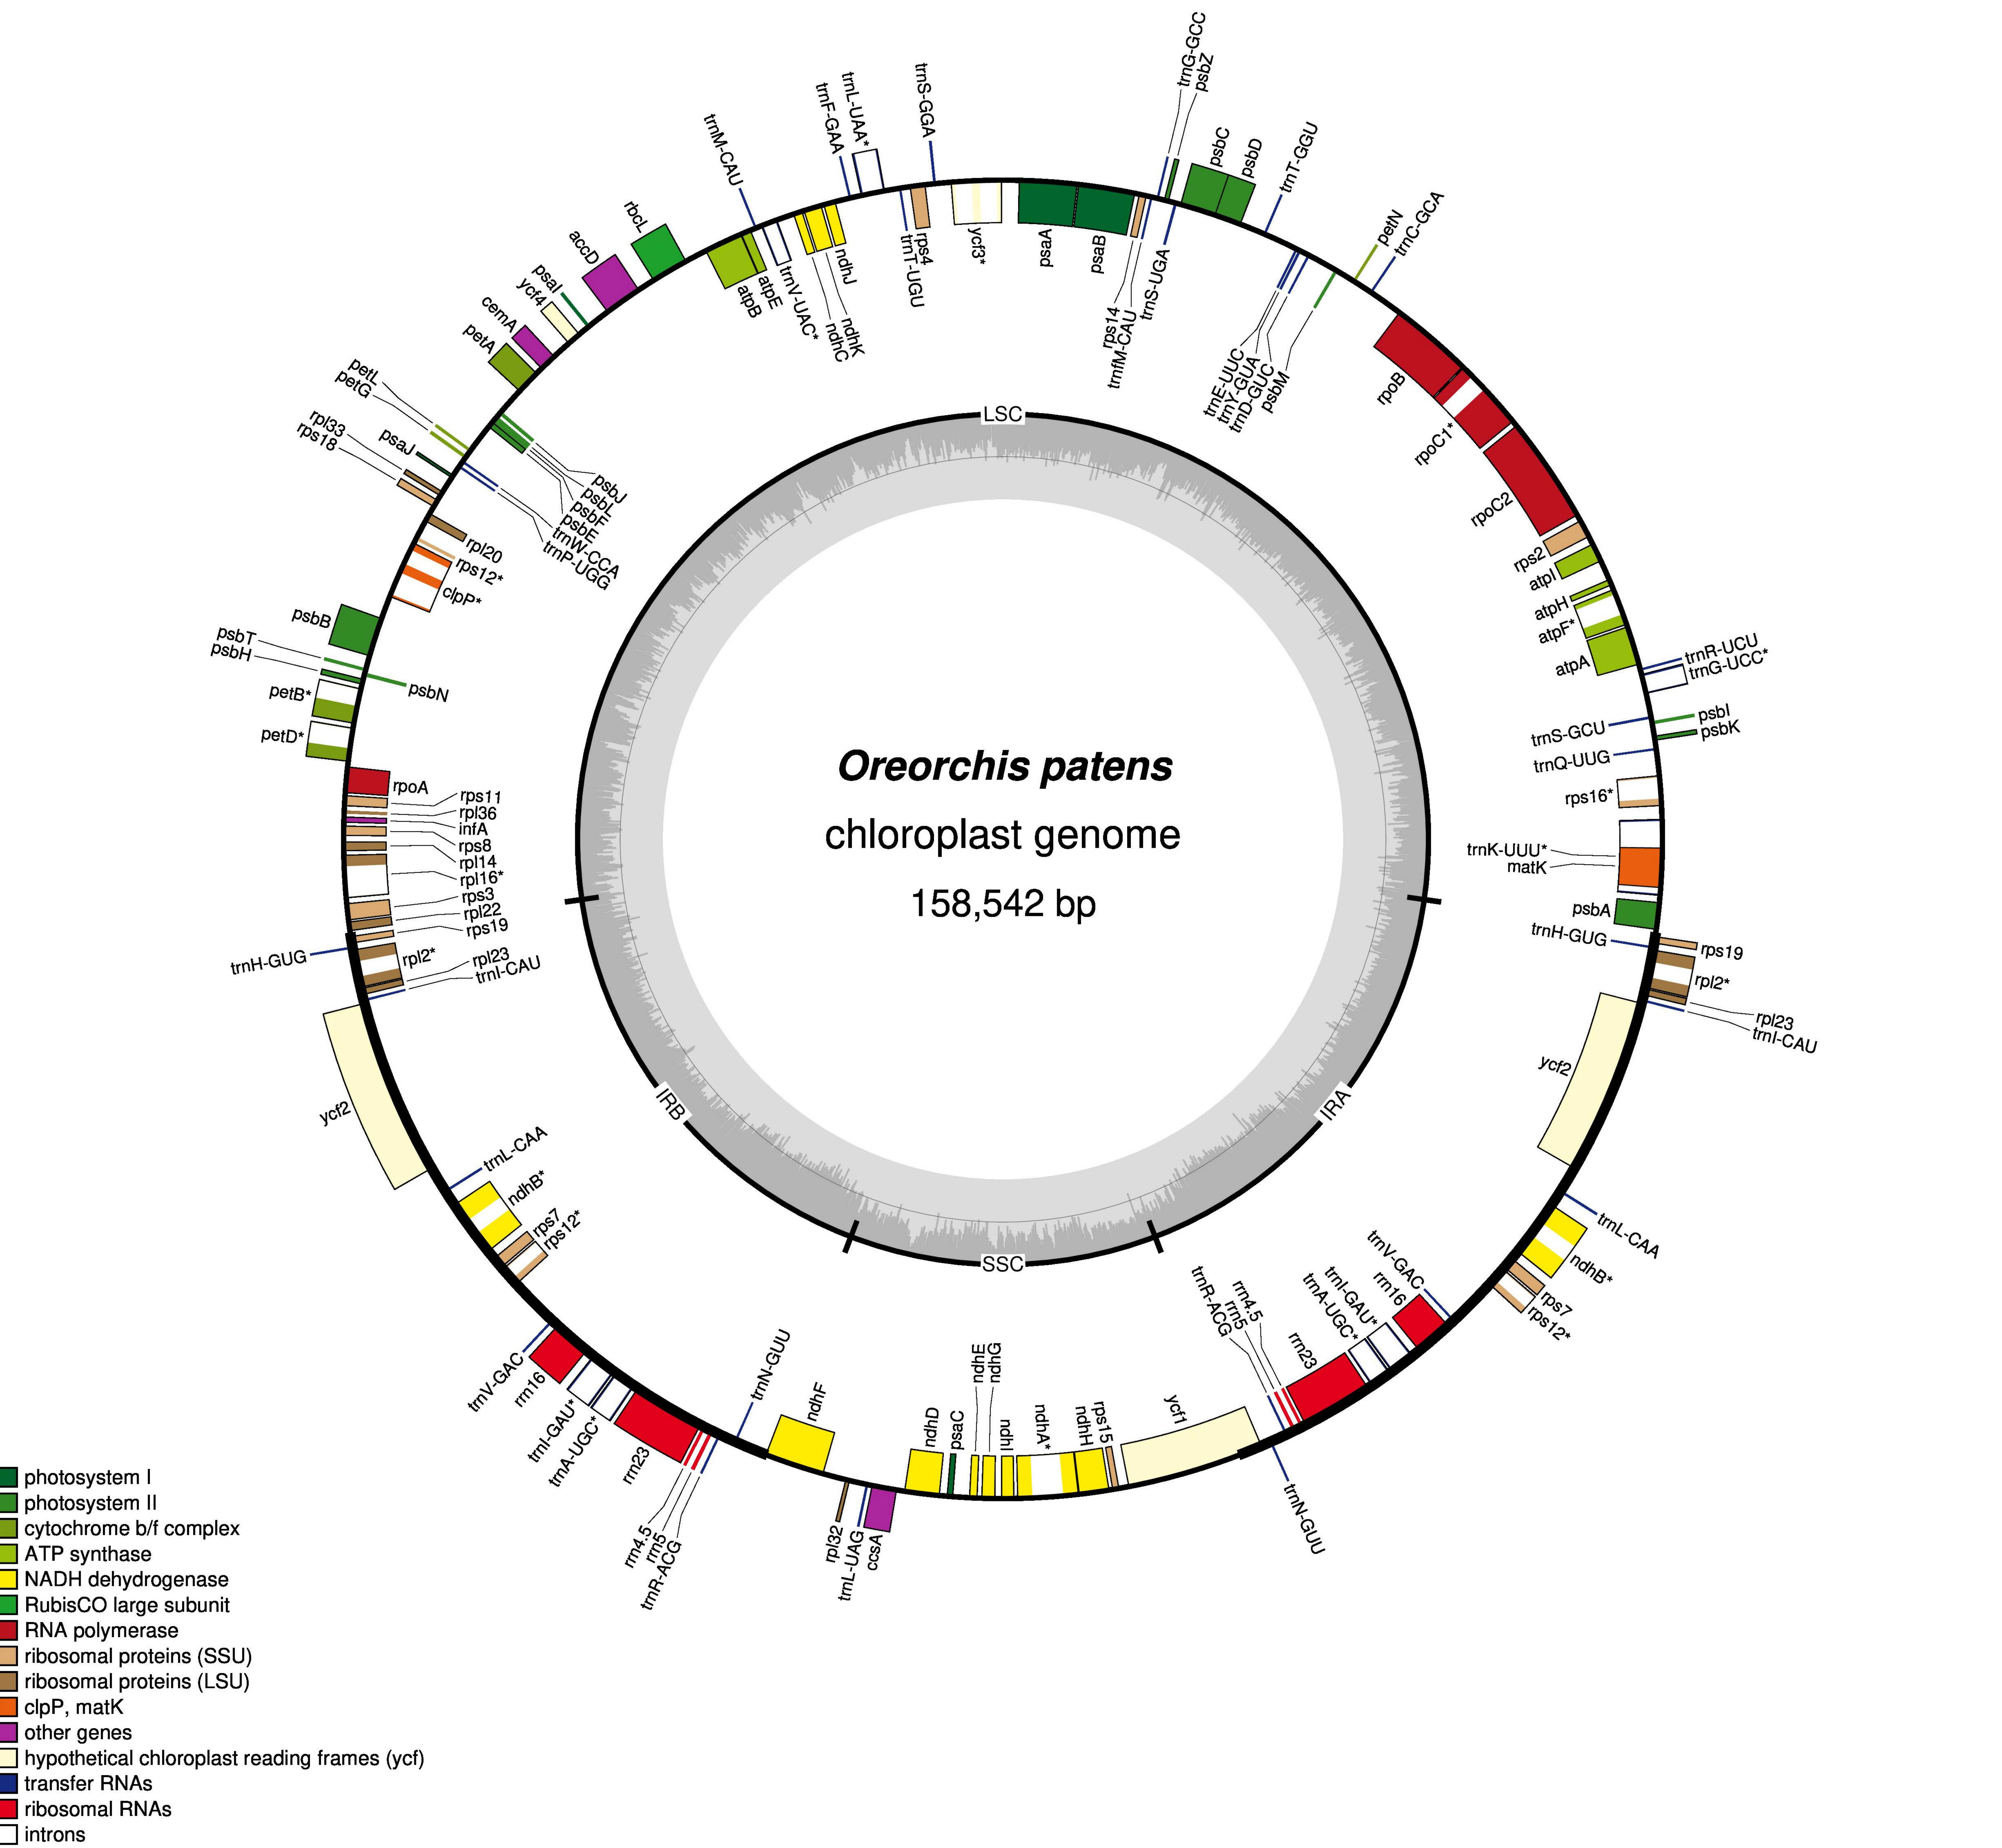

Epidendroideae  
Gastrodieae

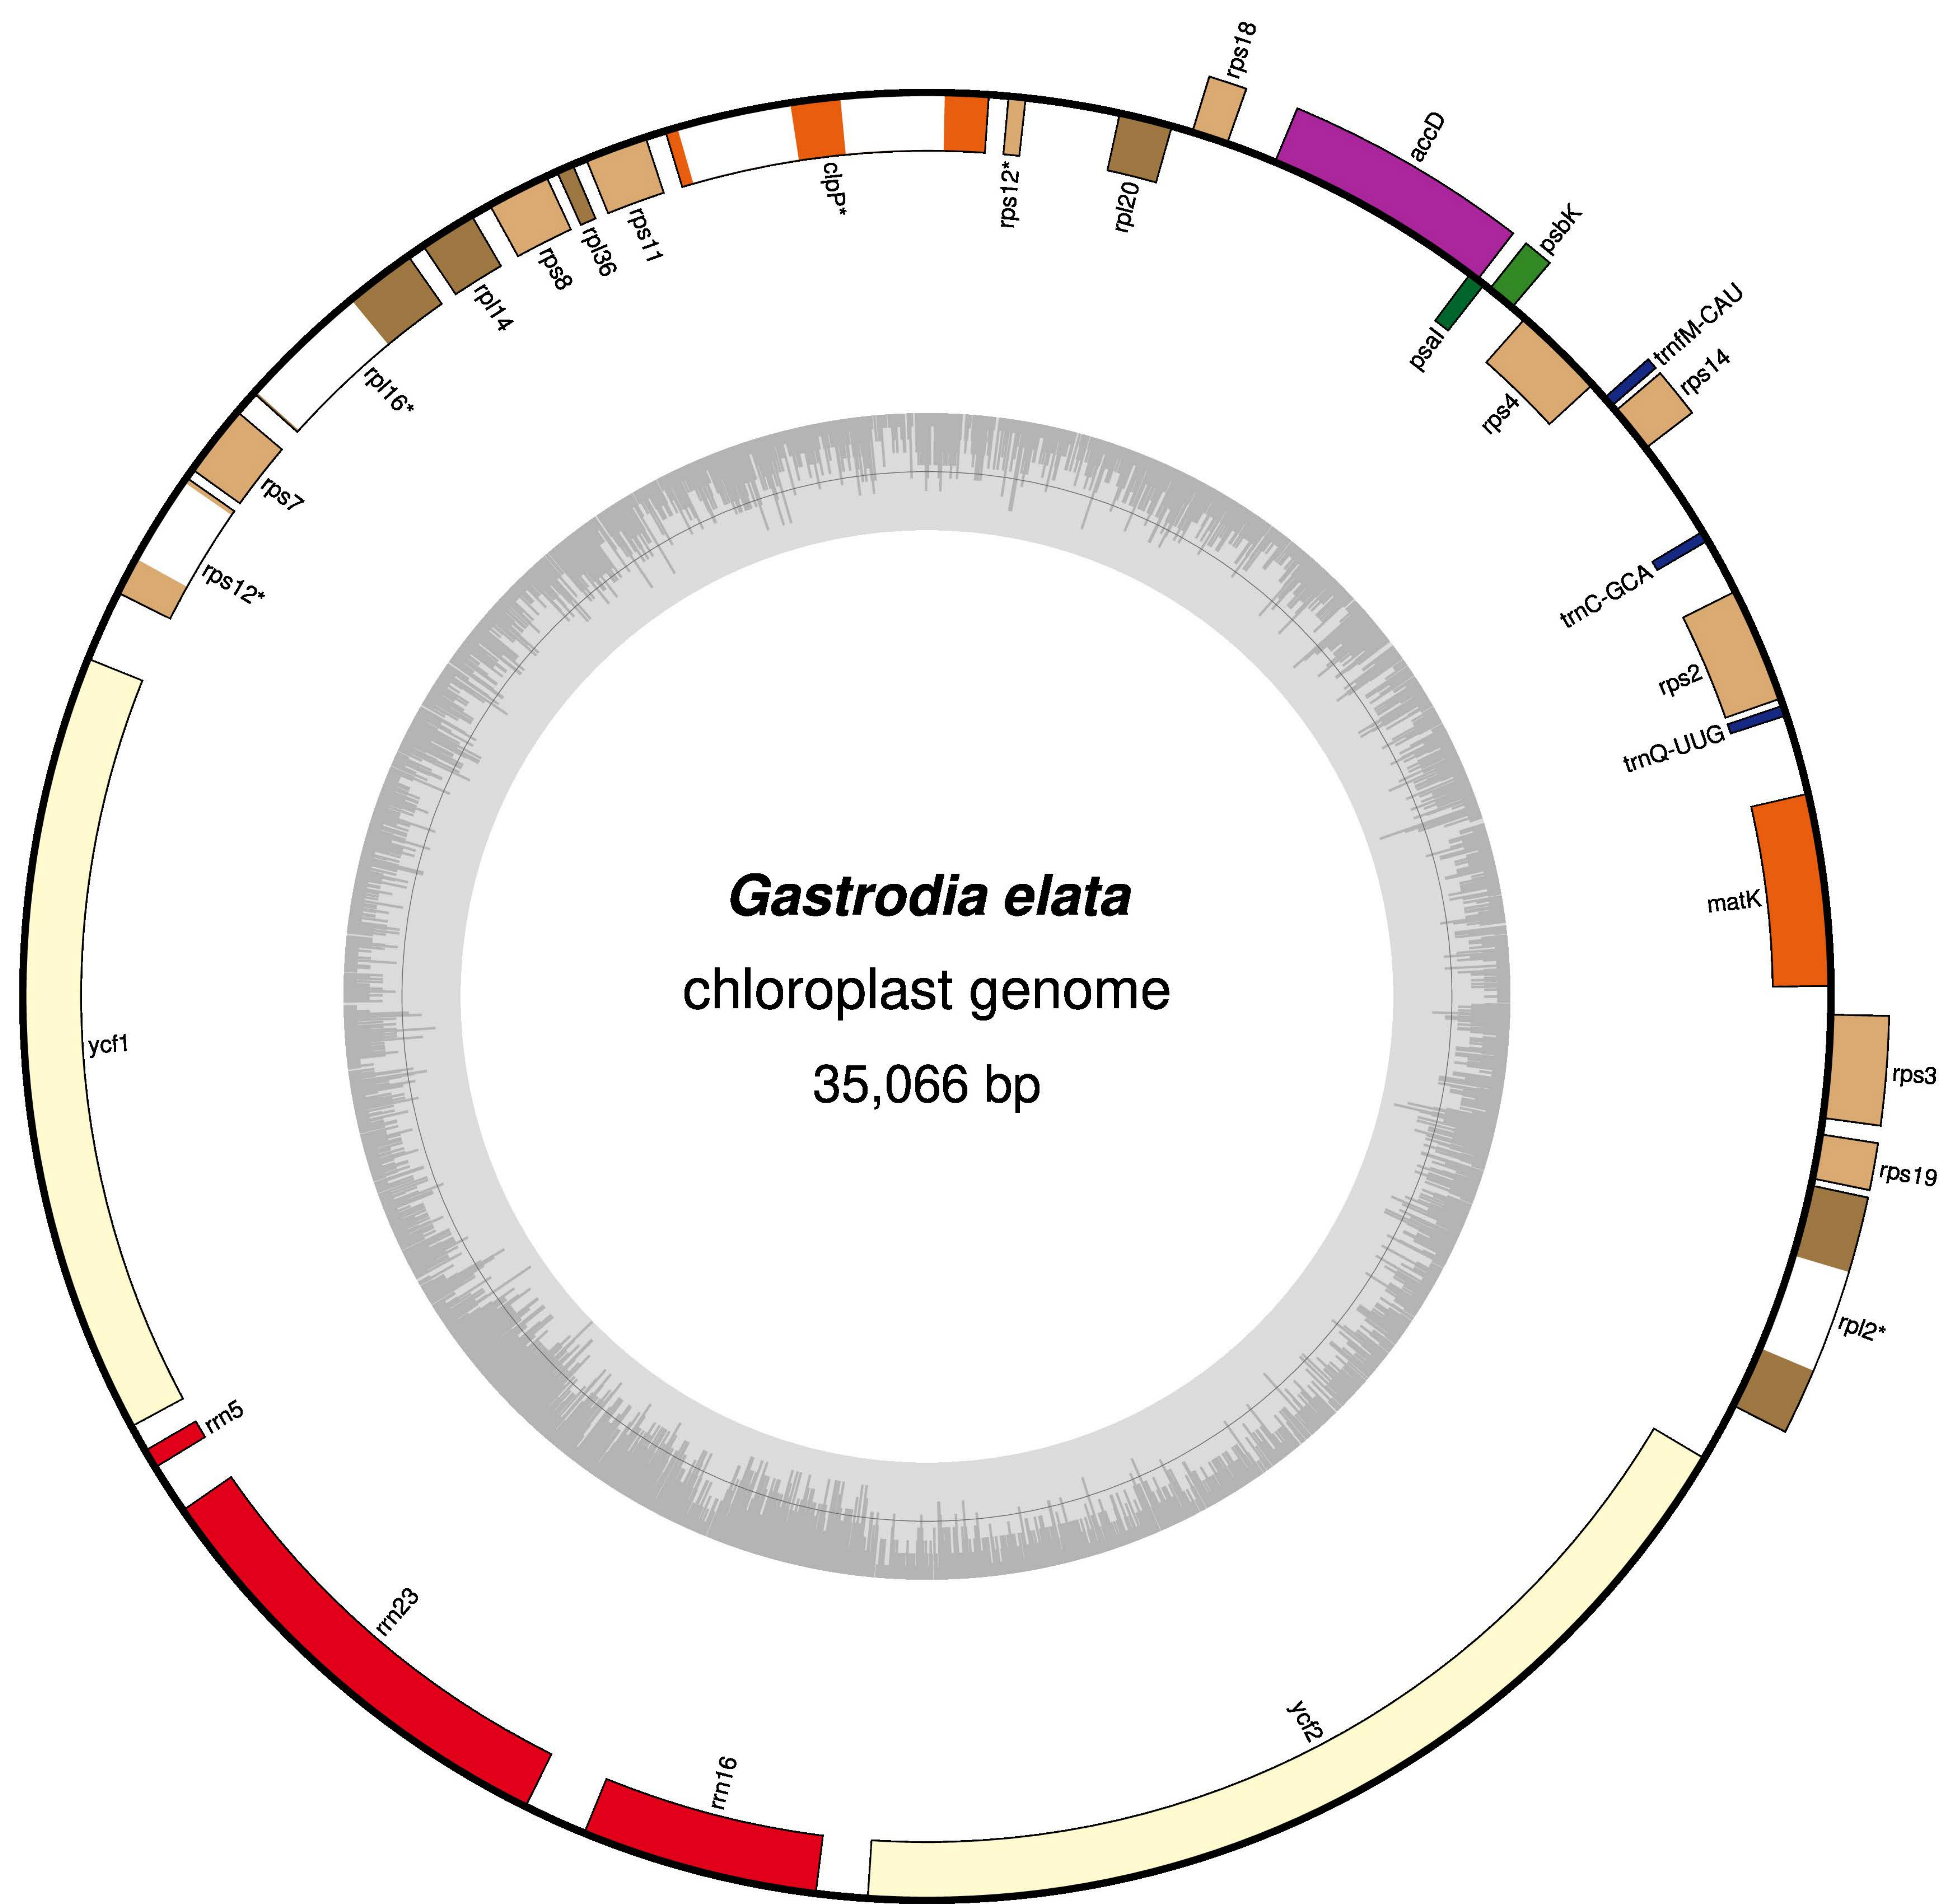

- photosystem I
- photosystem II
- ribosomal proteins (SSU)
- ribosomal proteins (LSU)
- clpP, matK
- other genes
- hypothetical chloroplast reading frames (ycf)
- transfer RNAs
- ribosomal RNAs
- introns

# Epidendroideae

## Malaxideae

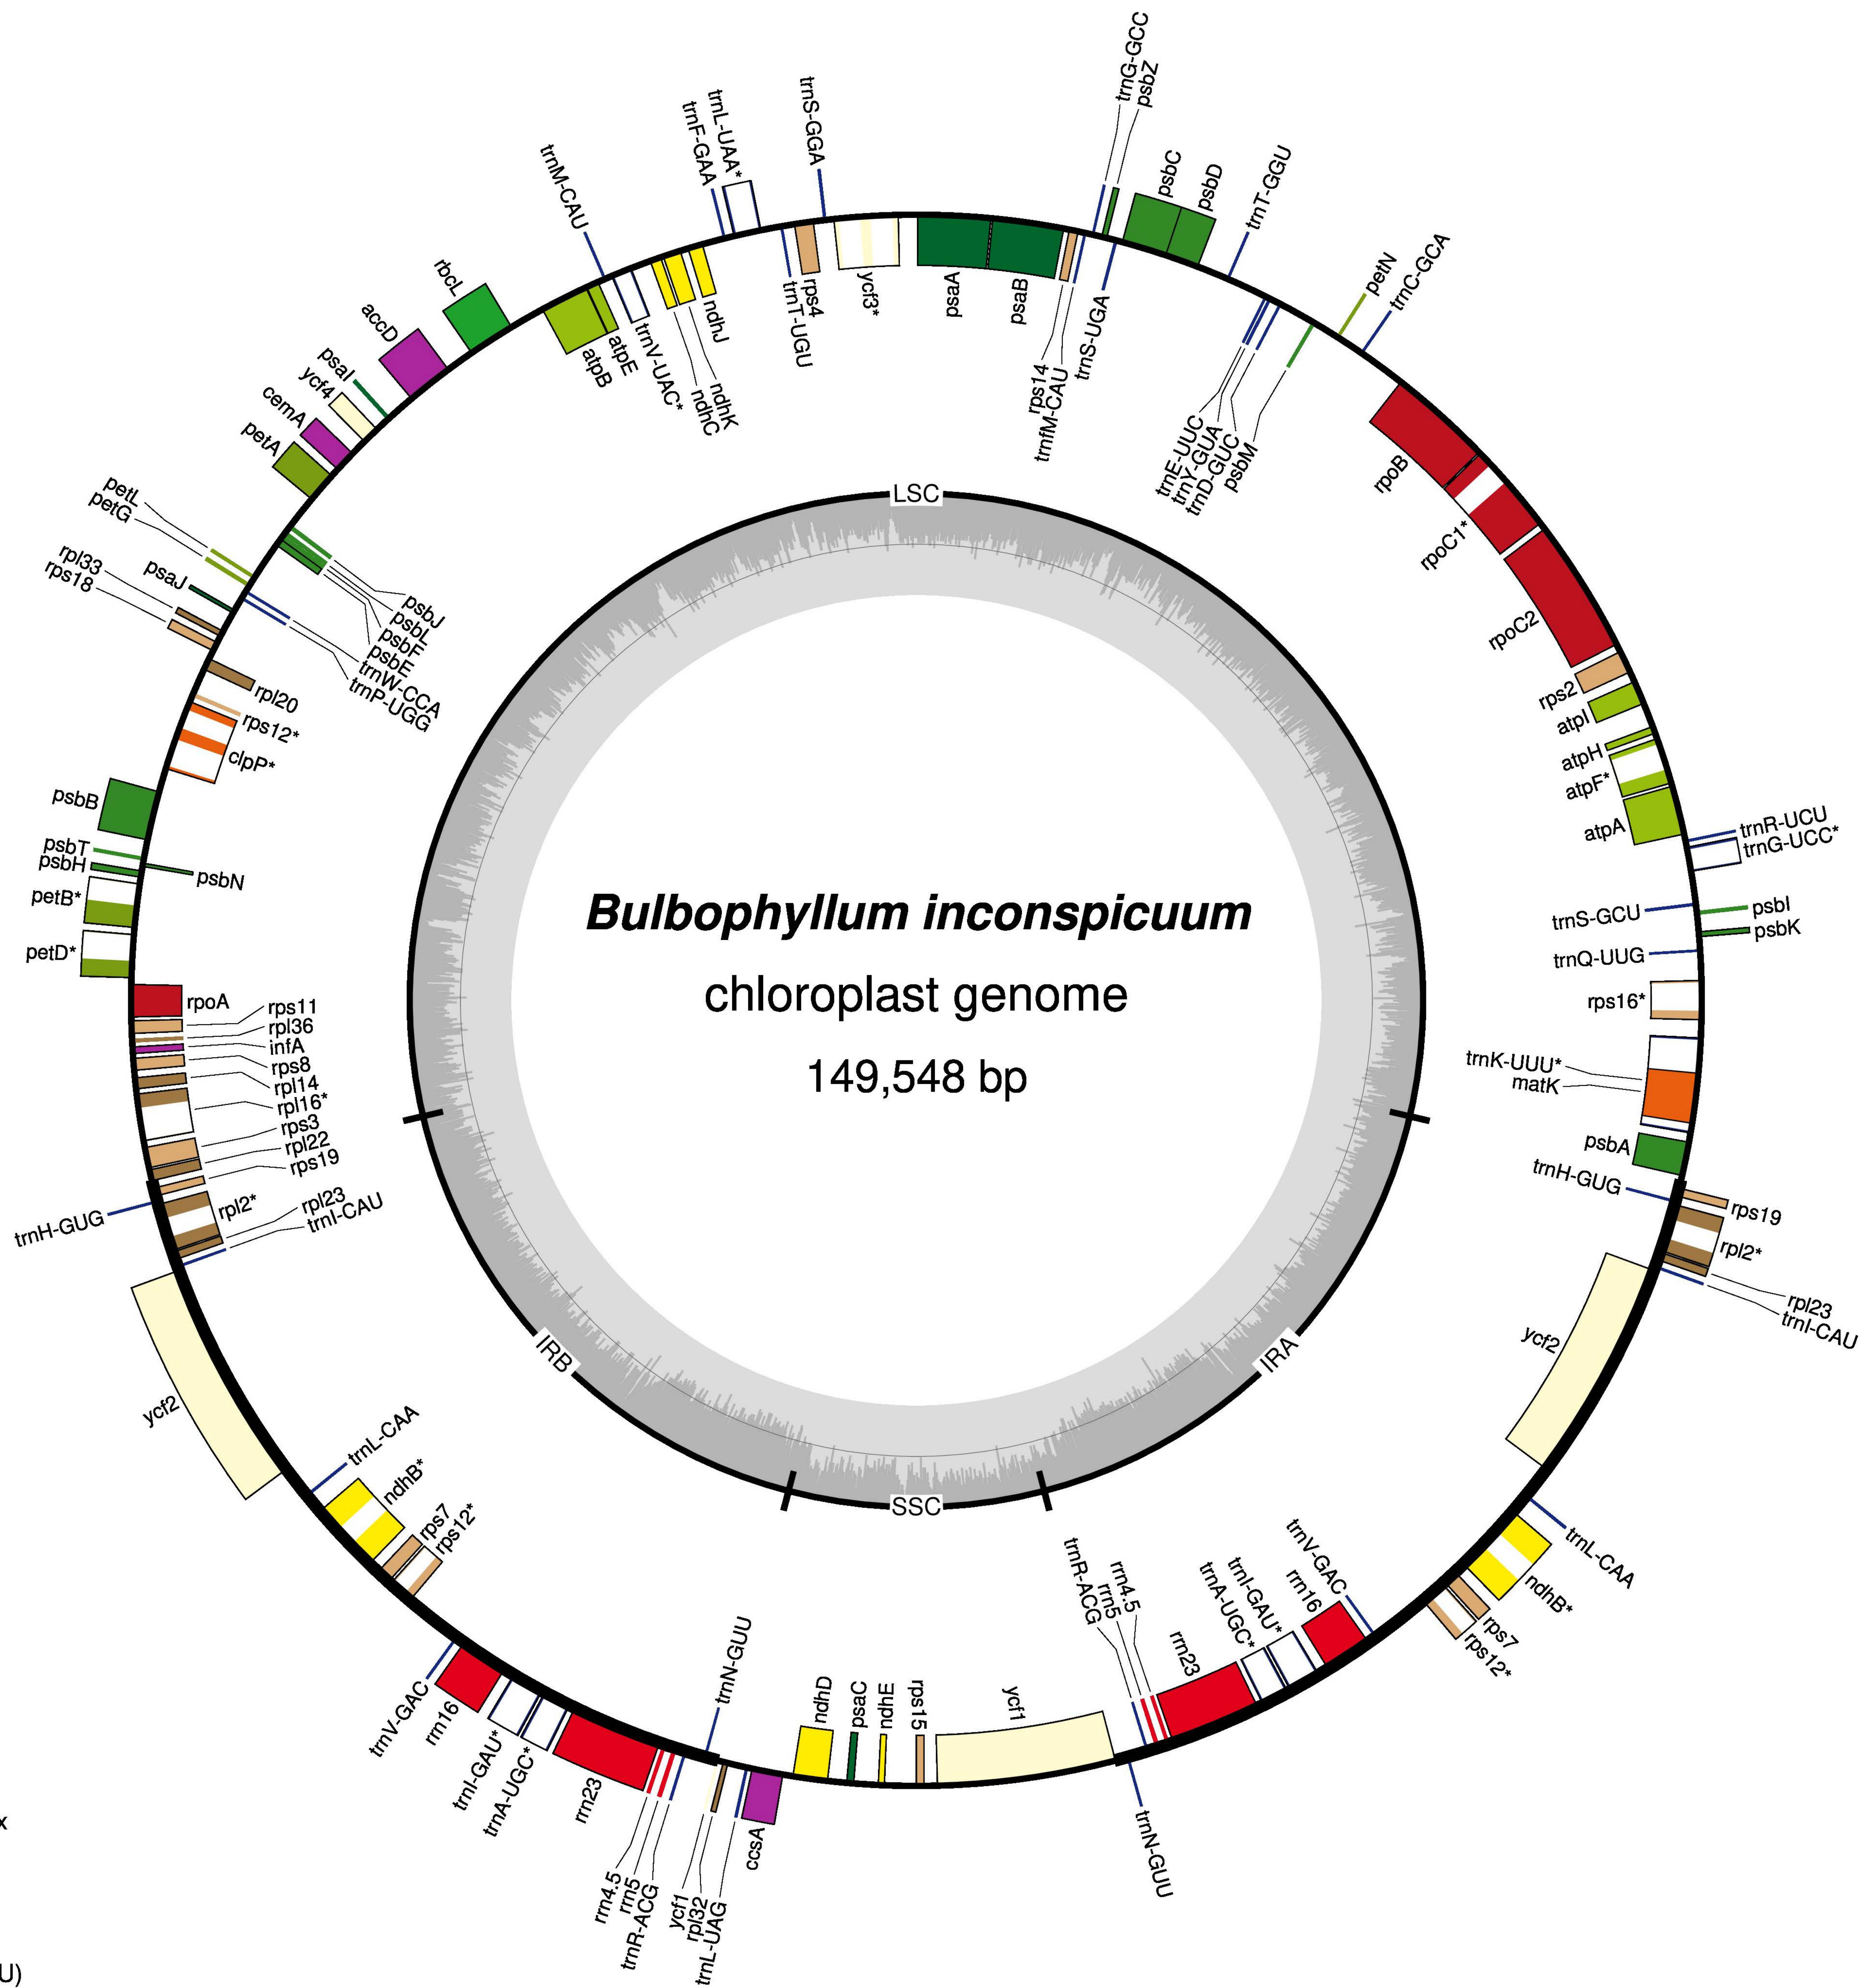

- 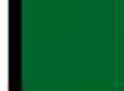 photosystem I
- 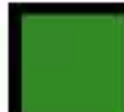 photosystem II
- 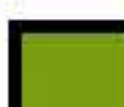 cytochrome b/f complex
- 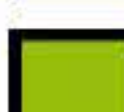 ATP synthase
- 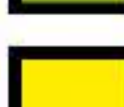 NADH dehydrogenase
- 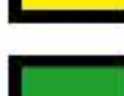 RubisCO large subunit
- 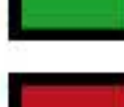 RNA polymerase
- 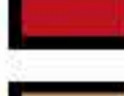 ribosomal proteins (SSU)
- 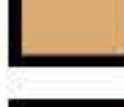 ribosomal proteins (LSU)
- 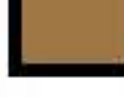 clpP, matK
- 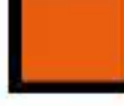 other genes
- 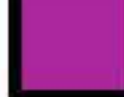 hypothetical chloroplast reading frames (ycf)
- 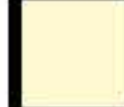 transfer RNAs
- 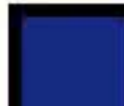 ribosomal RNAs
- 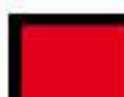 introns

# Epidendroideae

## Malaxideae

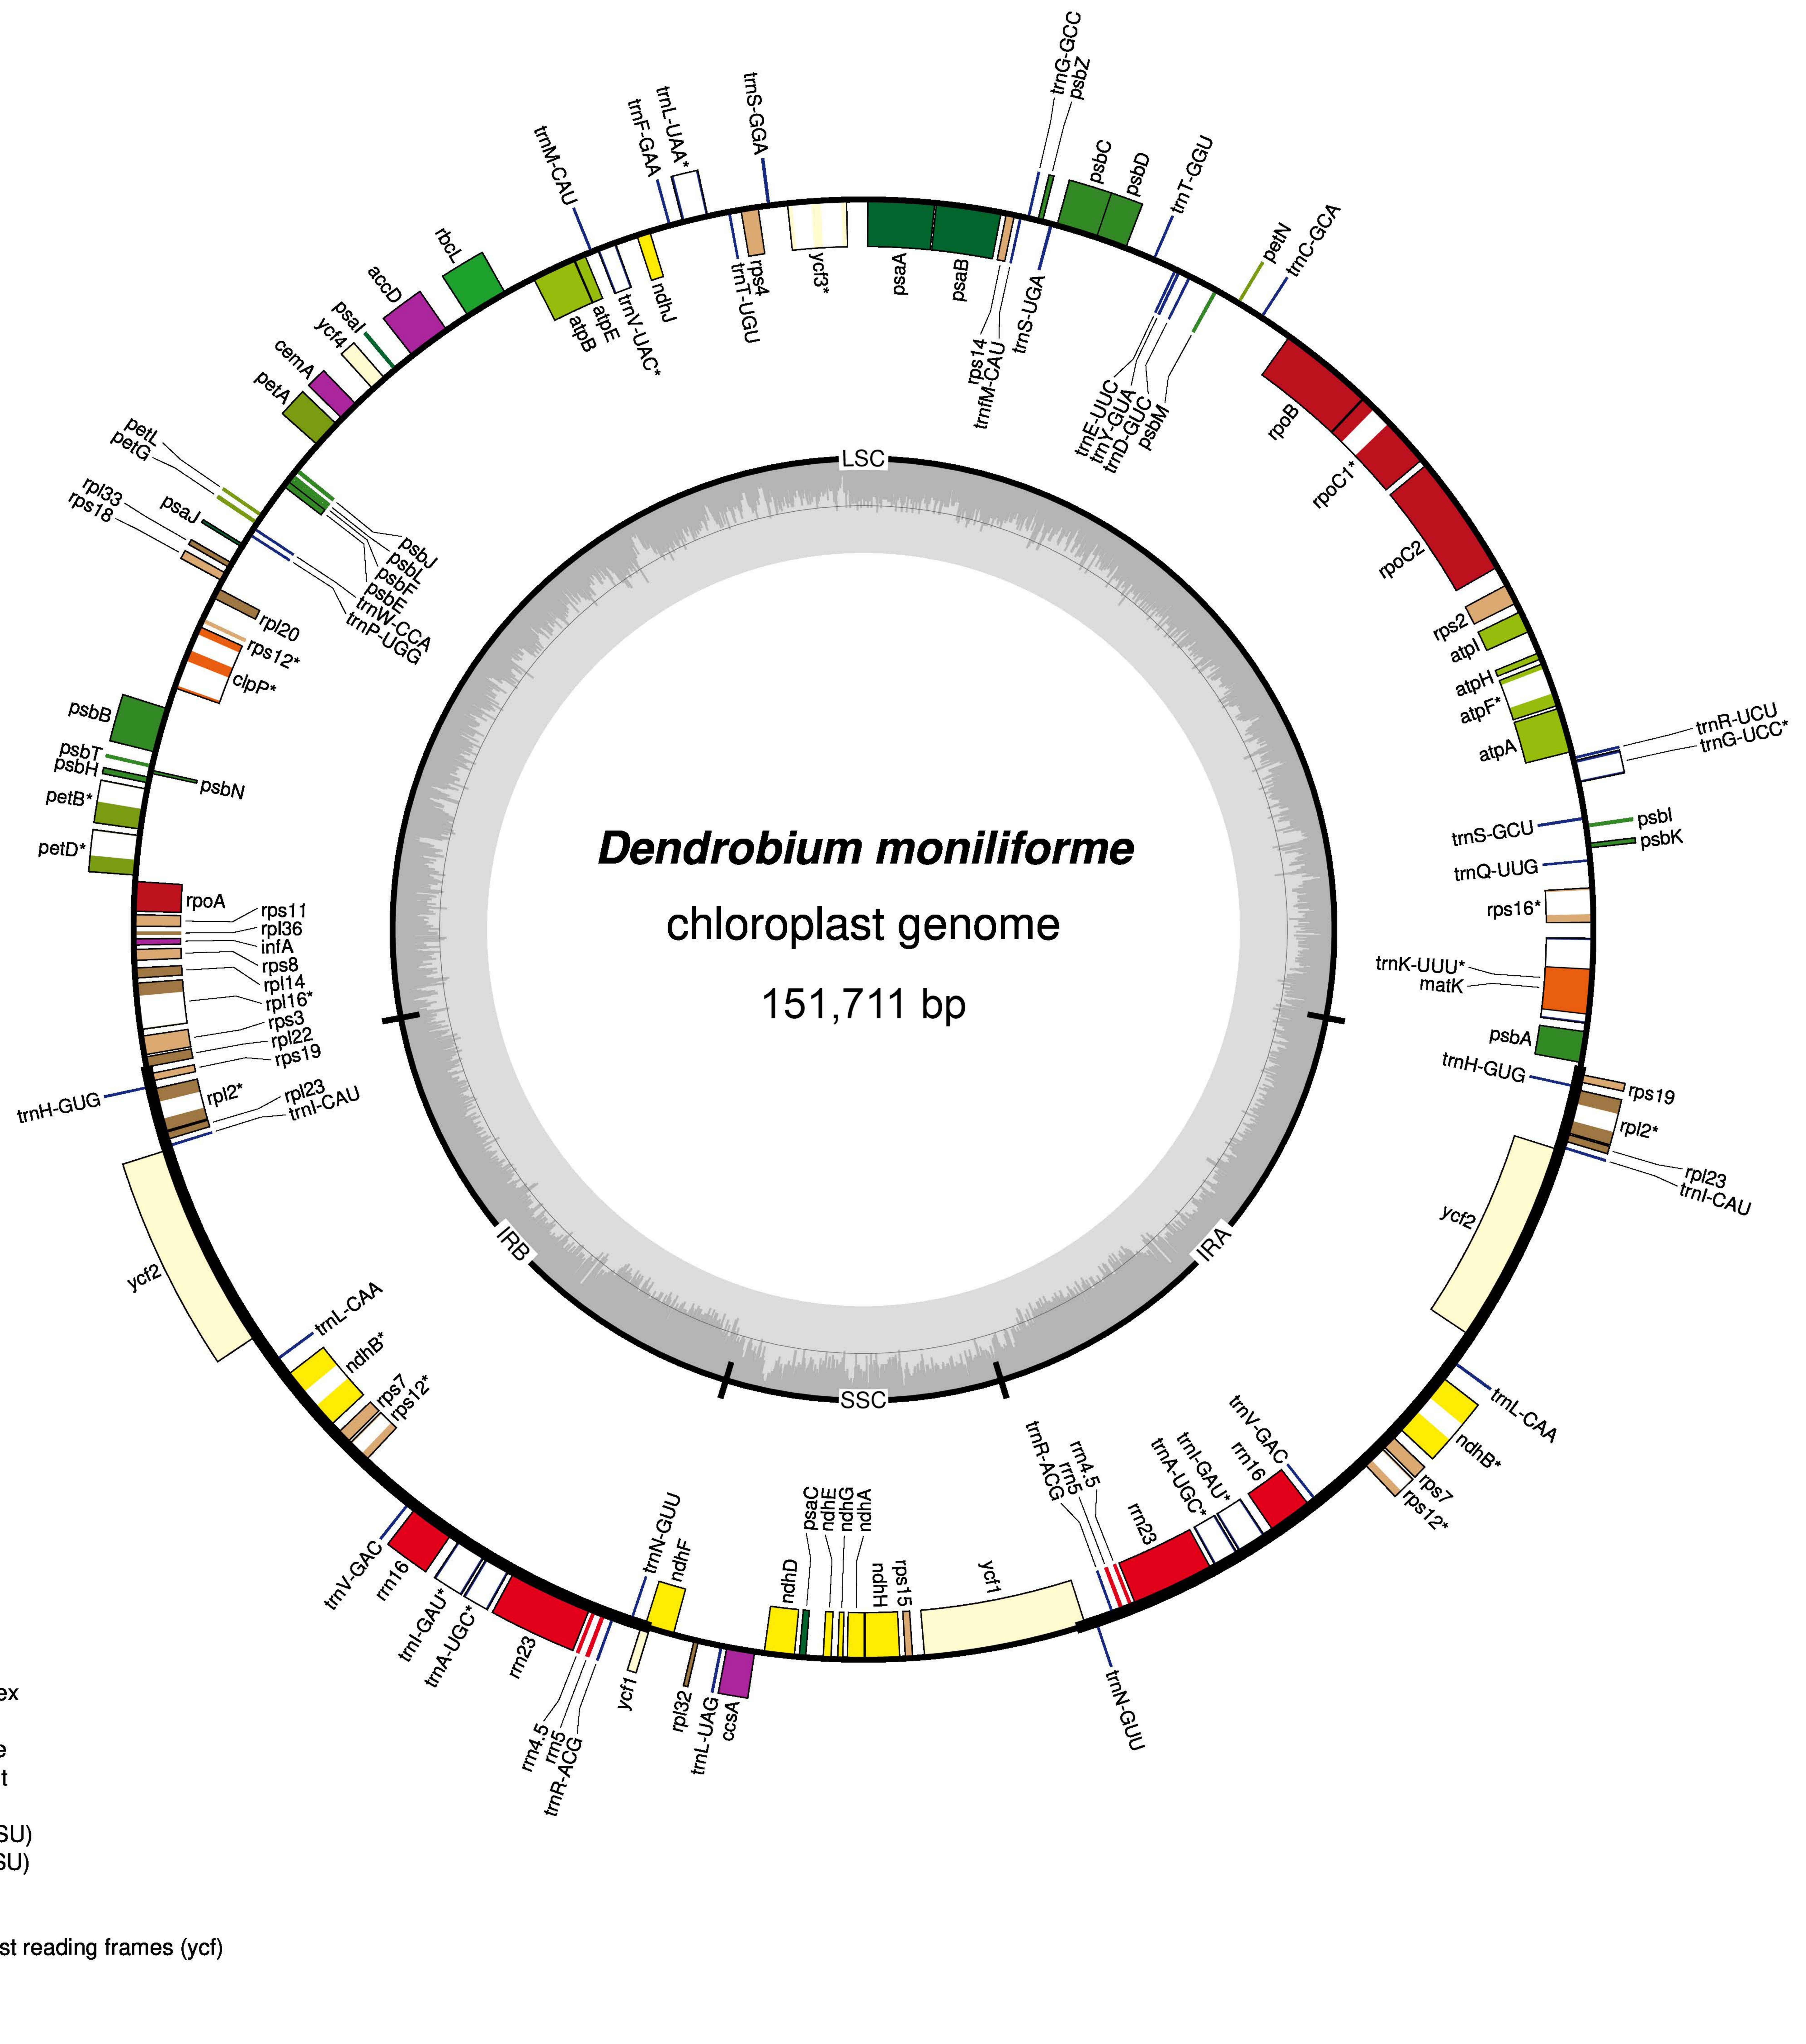

Epidendroideae  
Vandeae

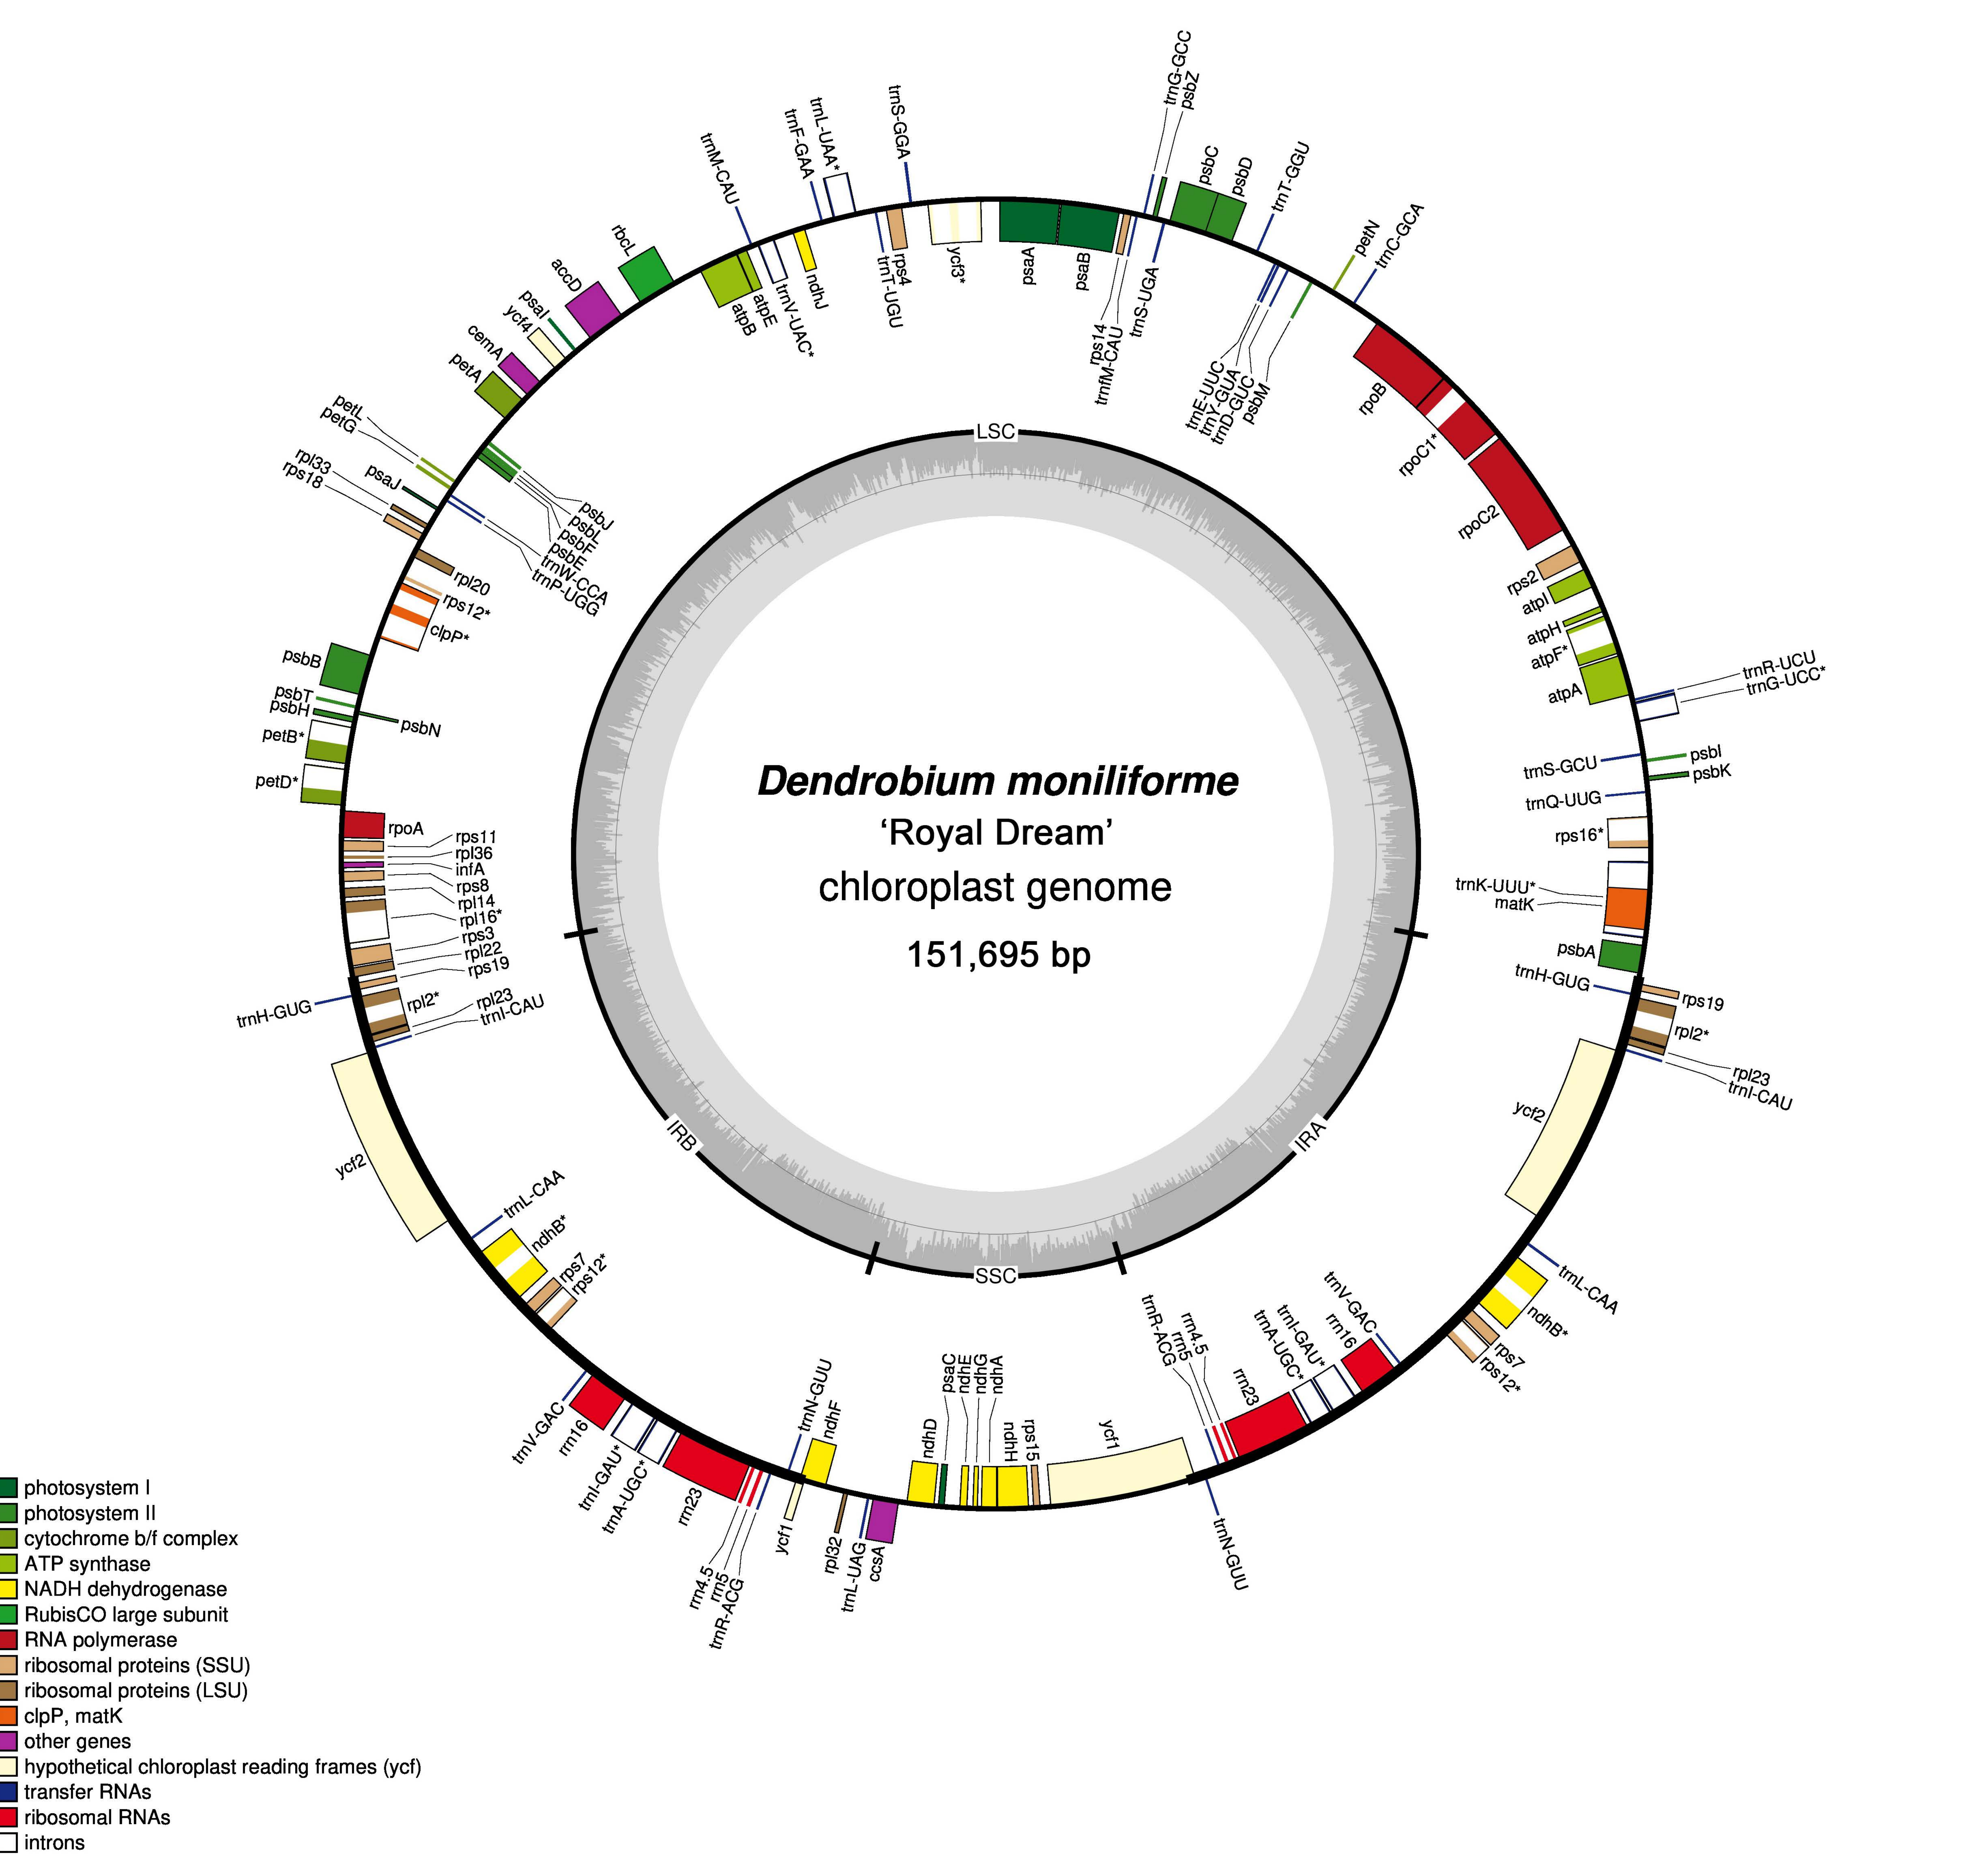

Epidendroideae  
Malaxideae

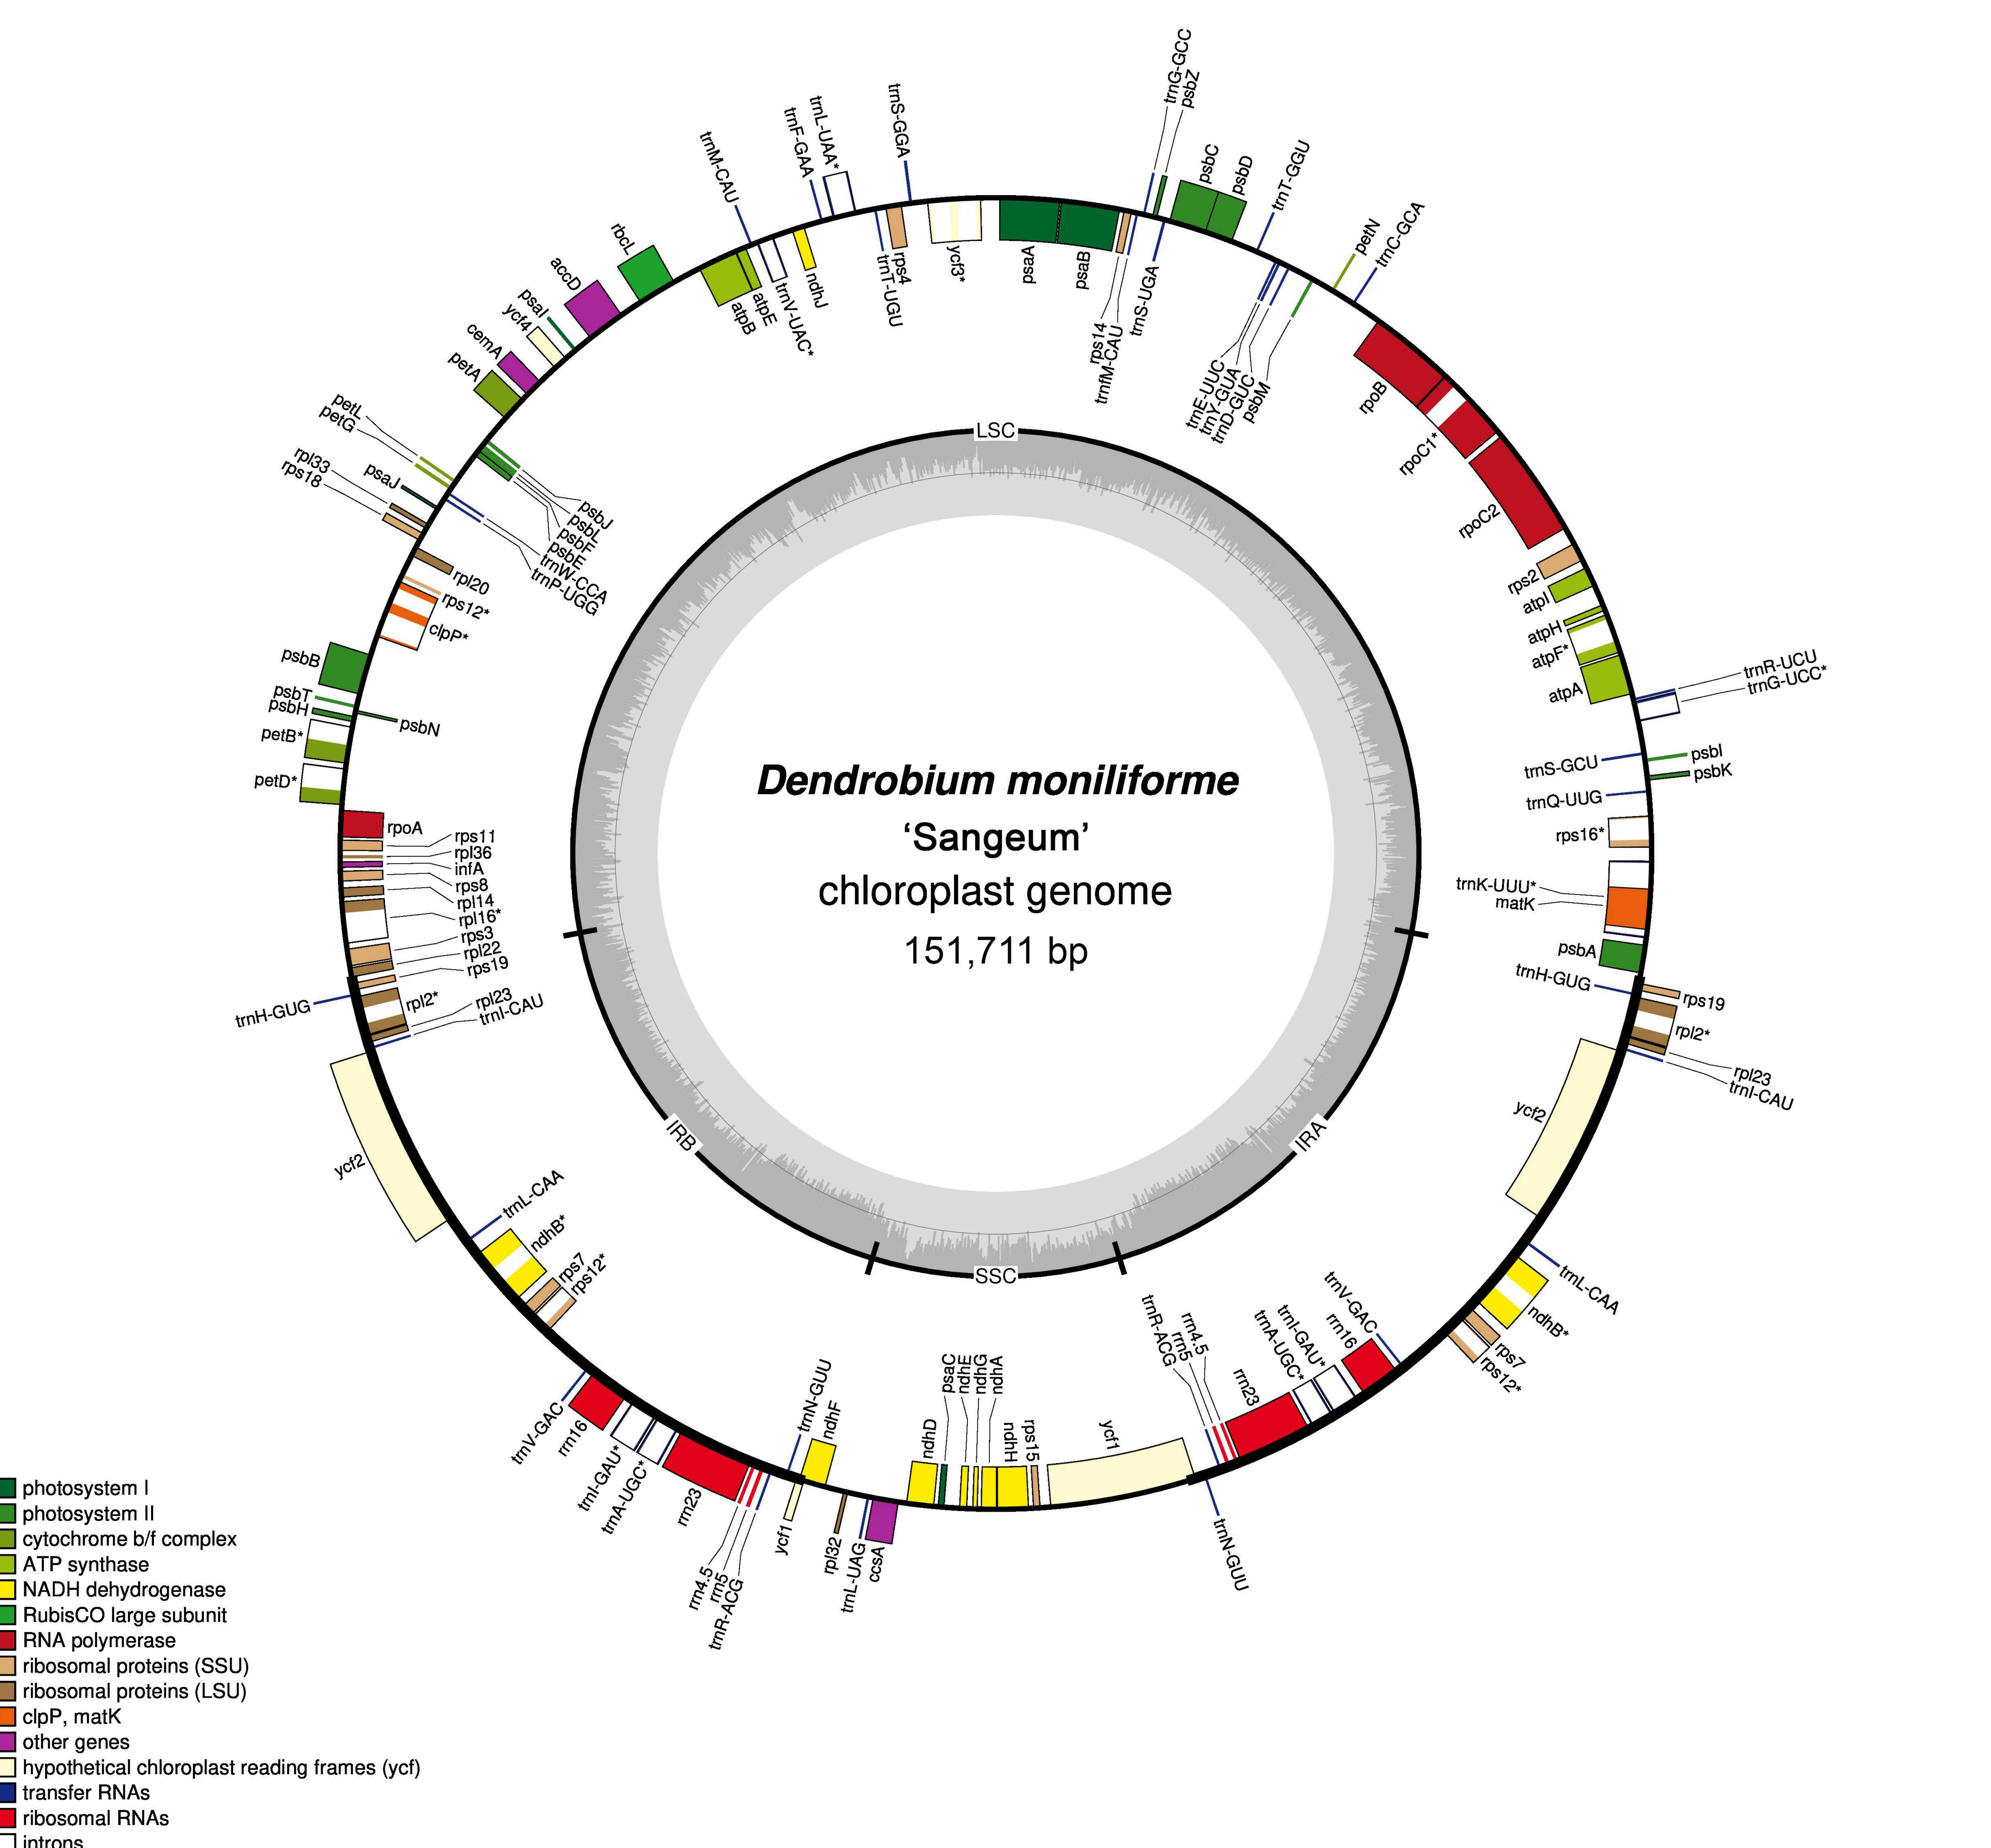

# Epidendroideae

## Malaxideae

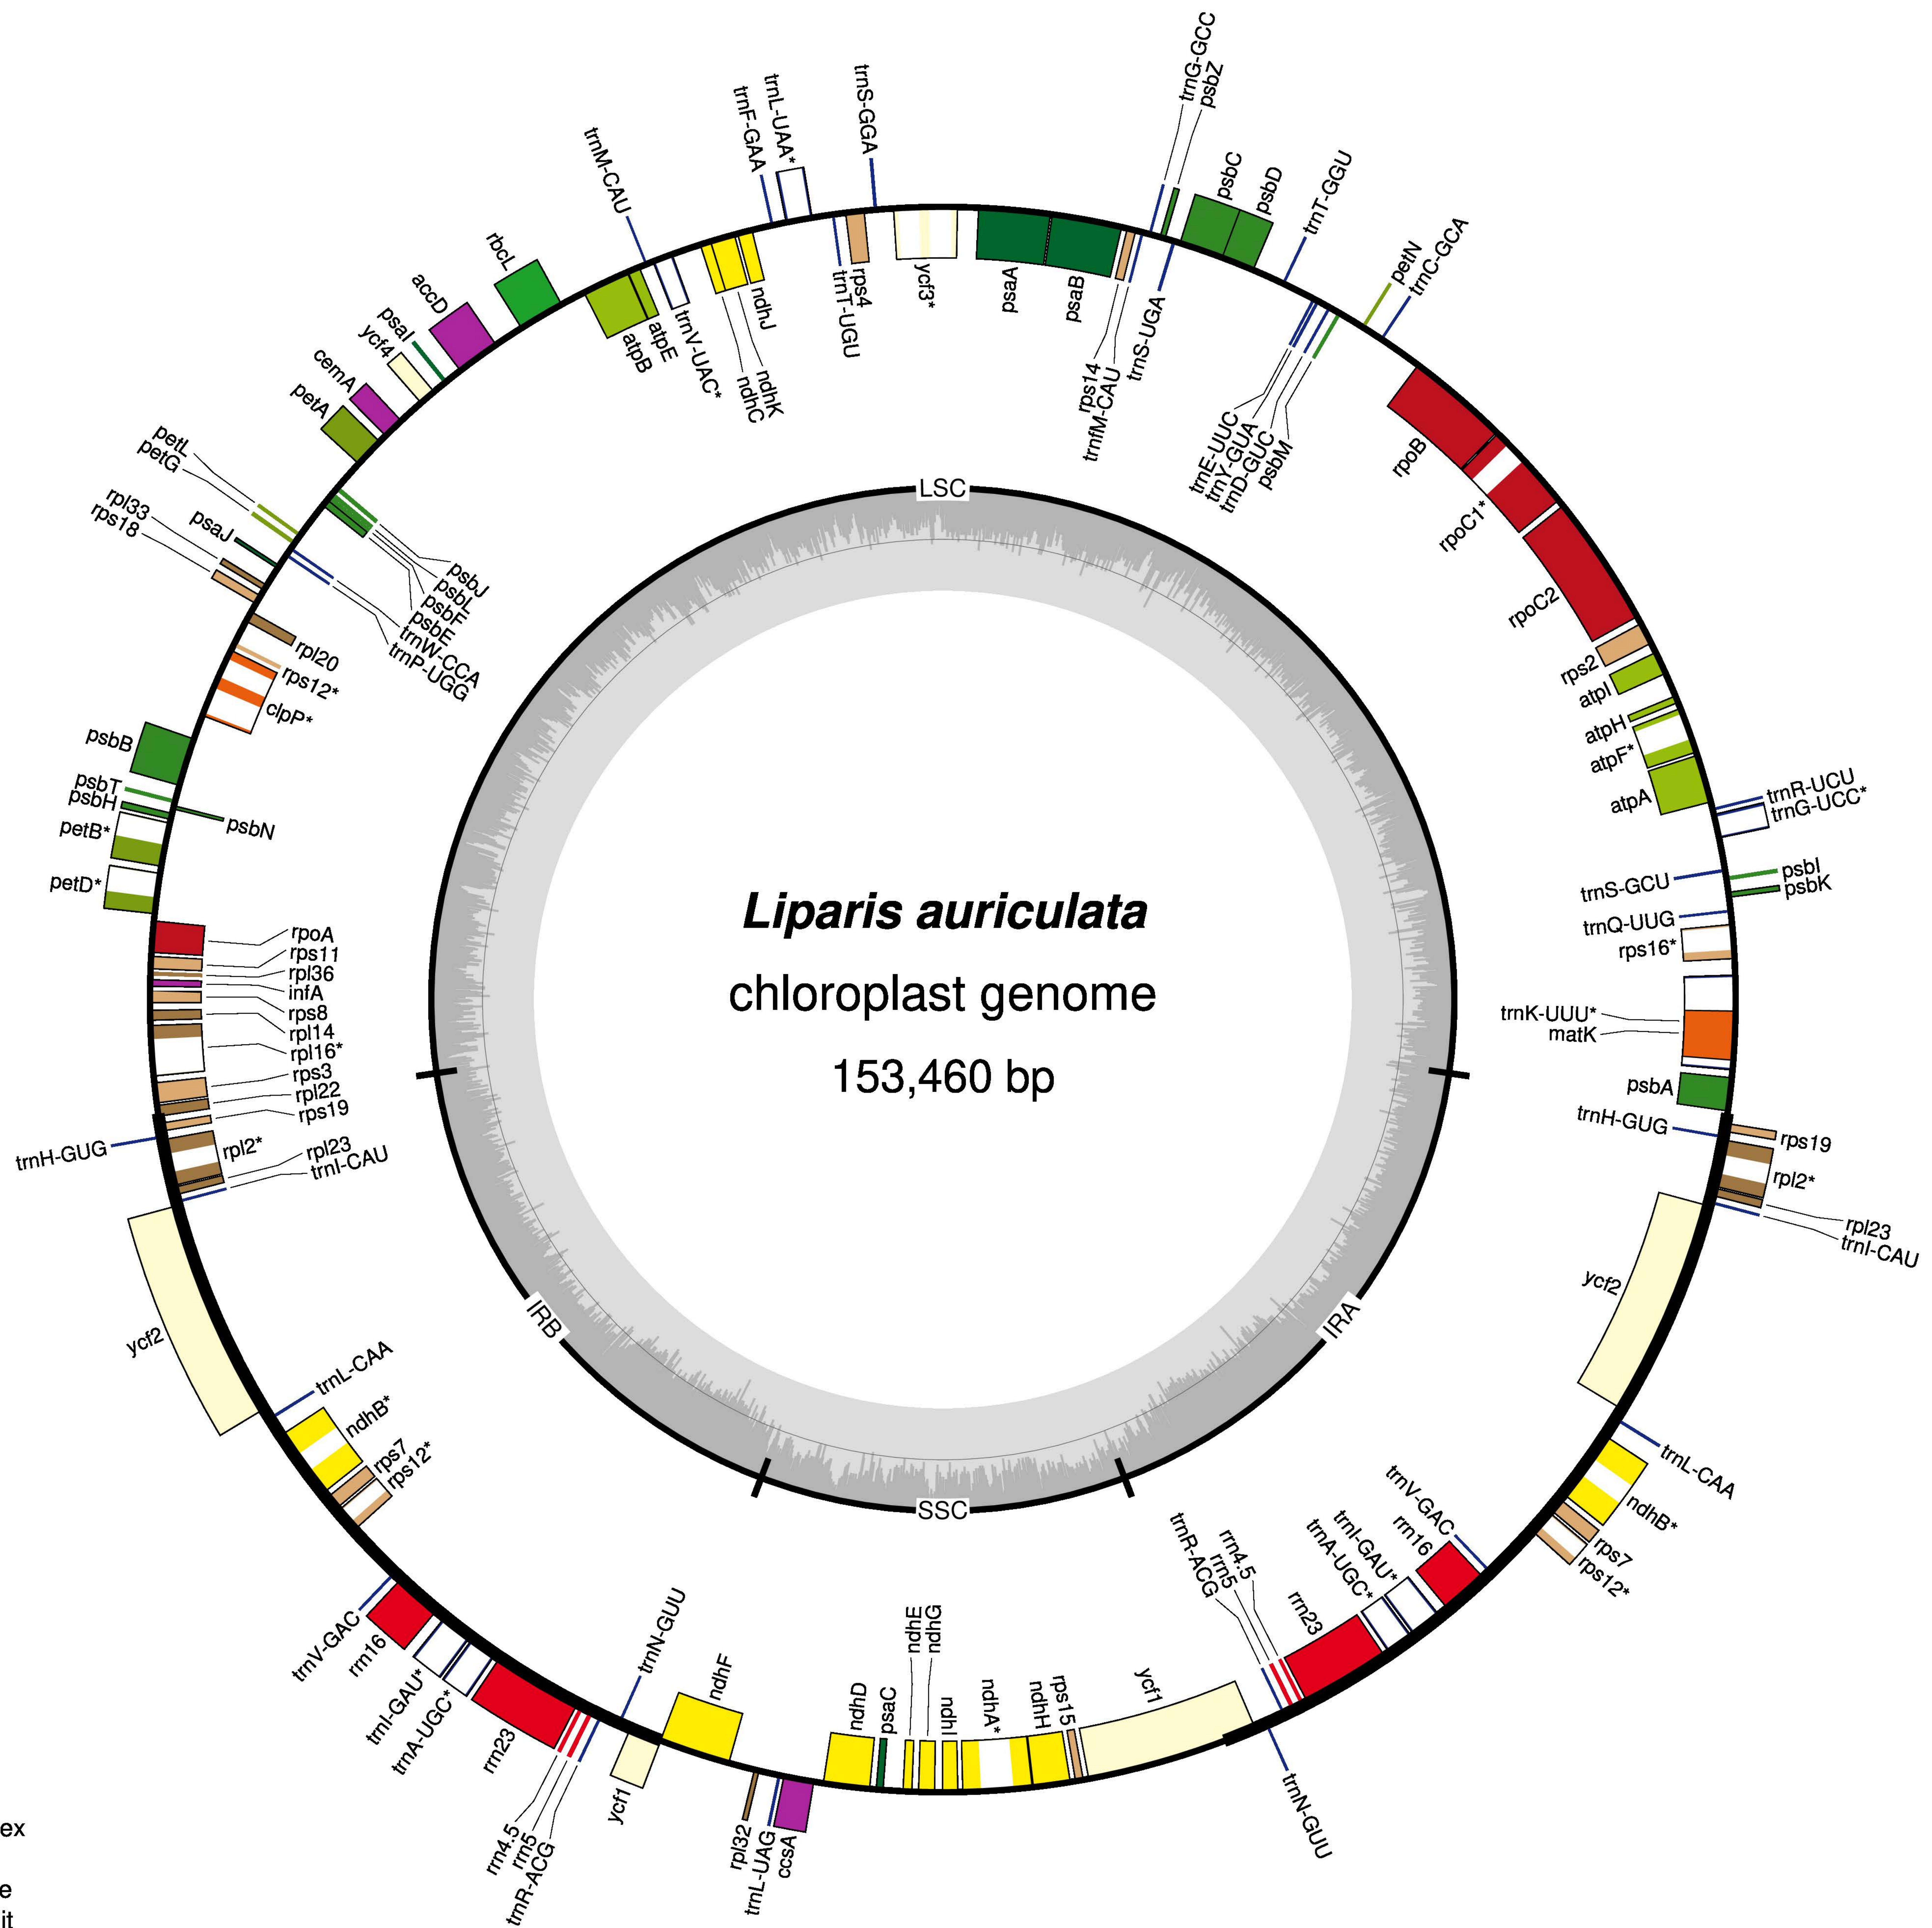

-  photosystem I
- 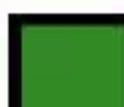 photosystem II
- 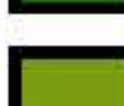 cytochrome b/f complex
- 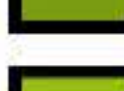 ATP synthase
- 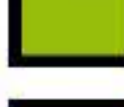 NADH dehydrogenase
- 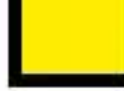 RubisCO large subunit
- 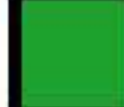 RNA polymerase
- 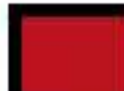 ribosomal proteins (SSU)
- 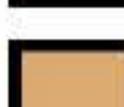 ribosomal proteins (LSU)
- 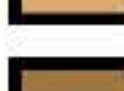 clpP, matK
- 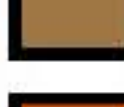 other genes
-  hypothetical chloroplast reading frames (ycf)
- 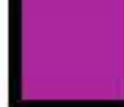 transfer RNAs
- 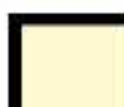 ribosomal RNAs
- 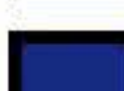 introns

# Epidendroideae

## Malaxideae

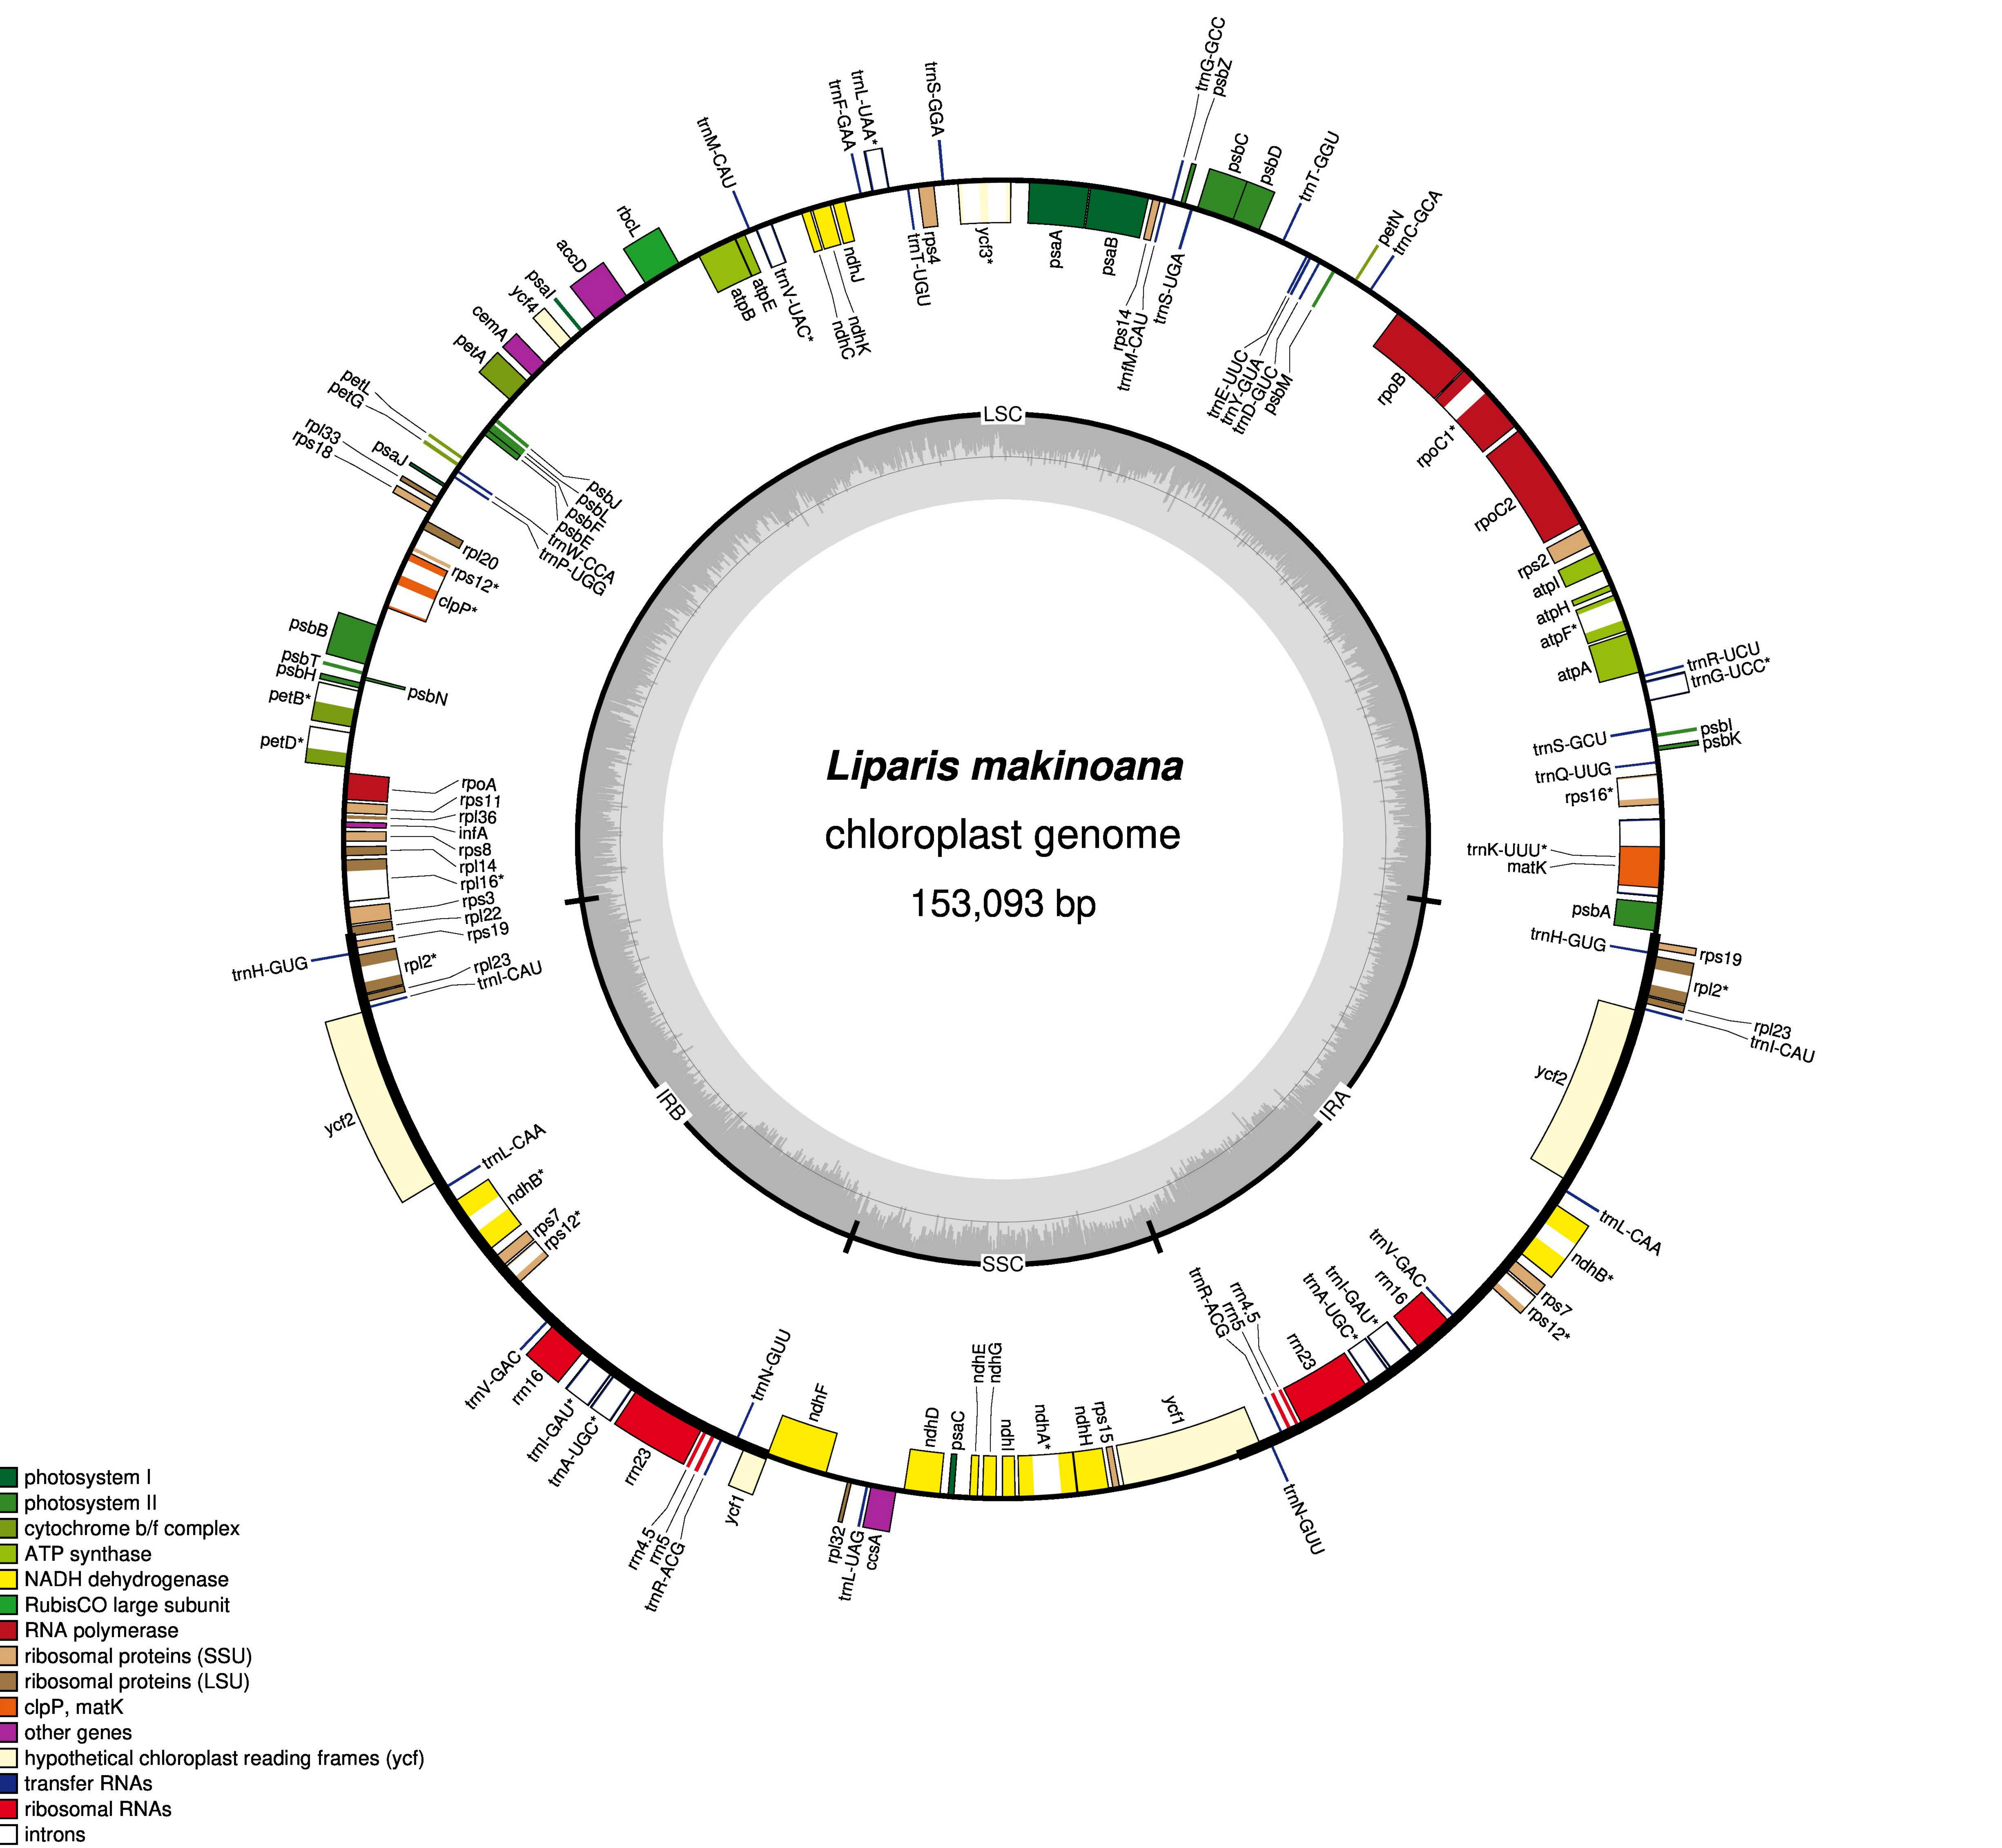

# Epidendroideae

## Neottieae

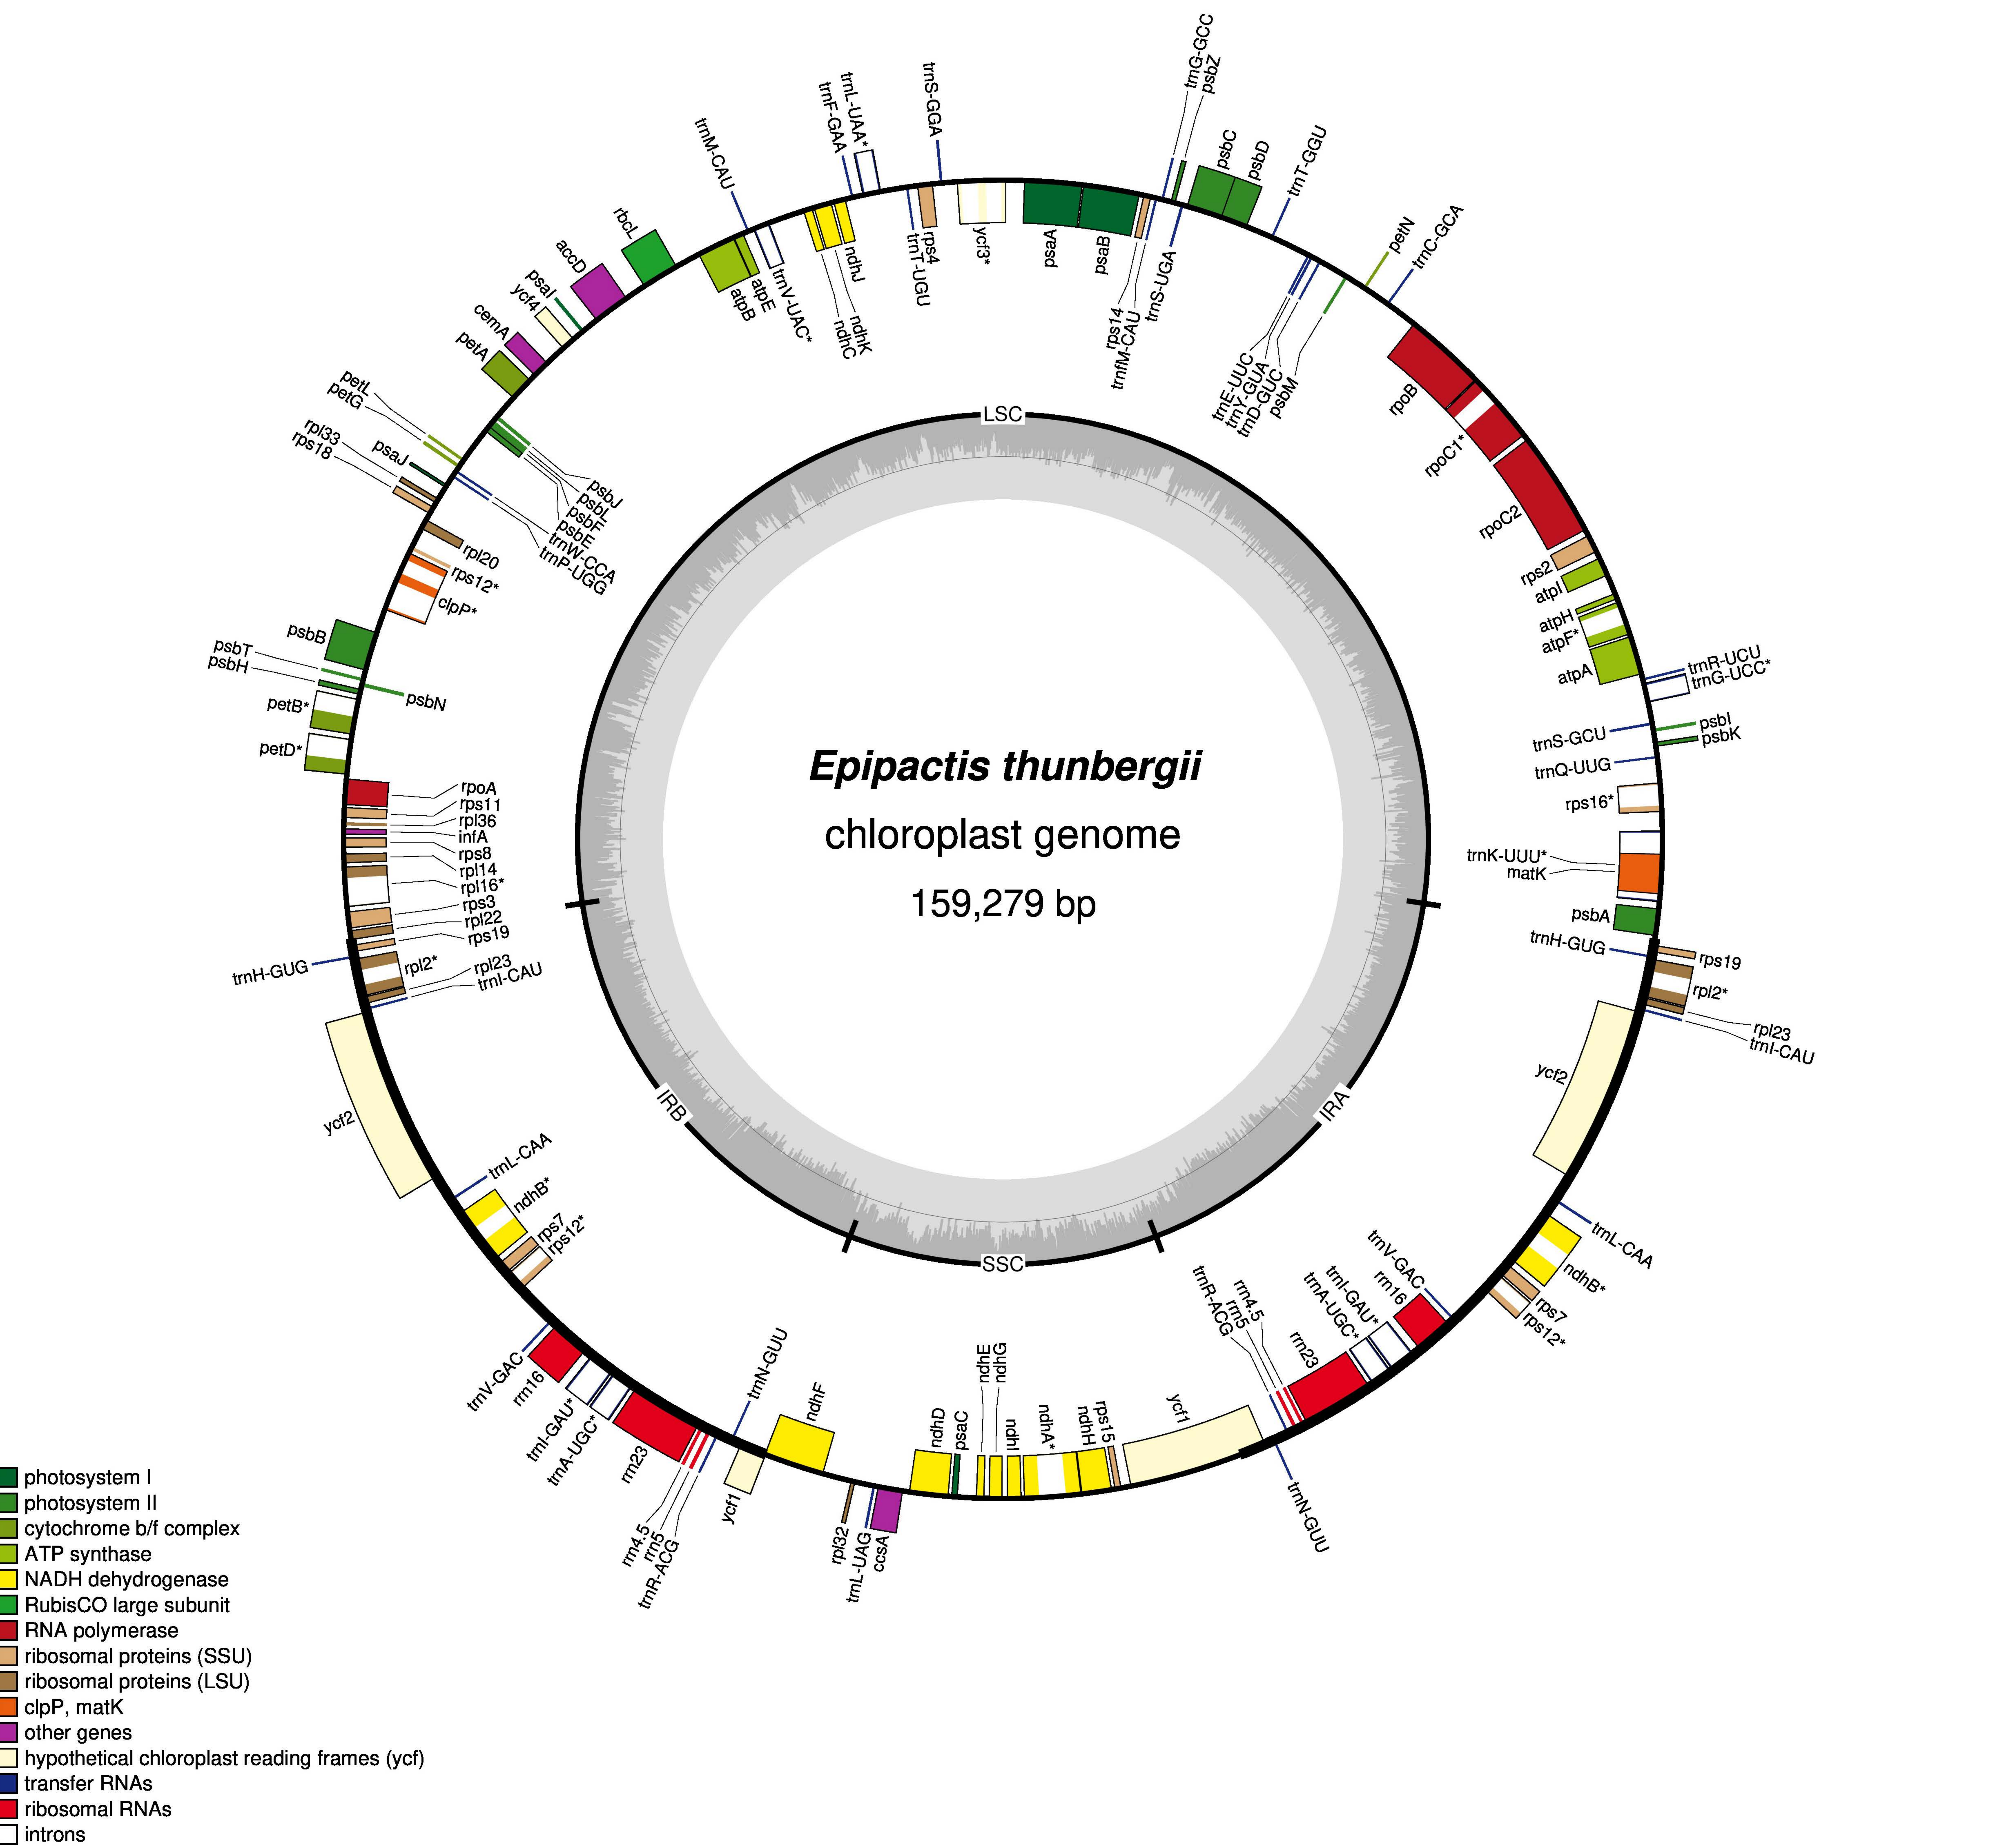

# Epidendroideae

## Vandeae

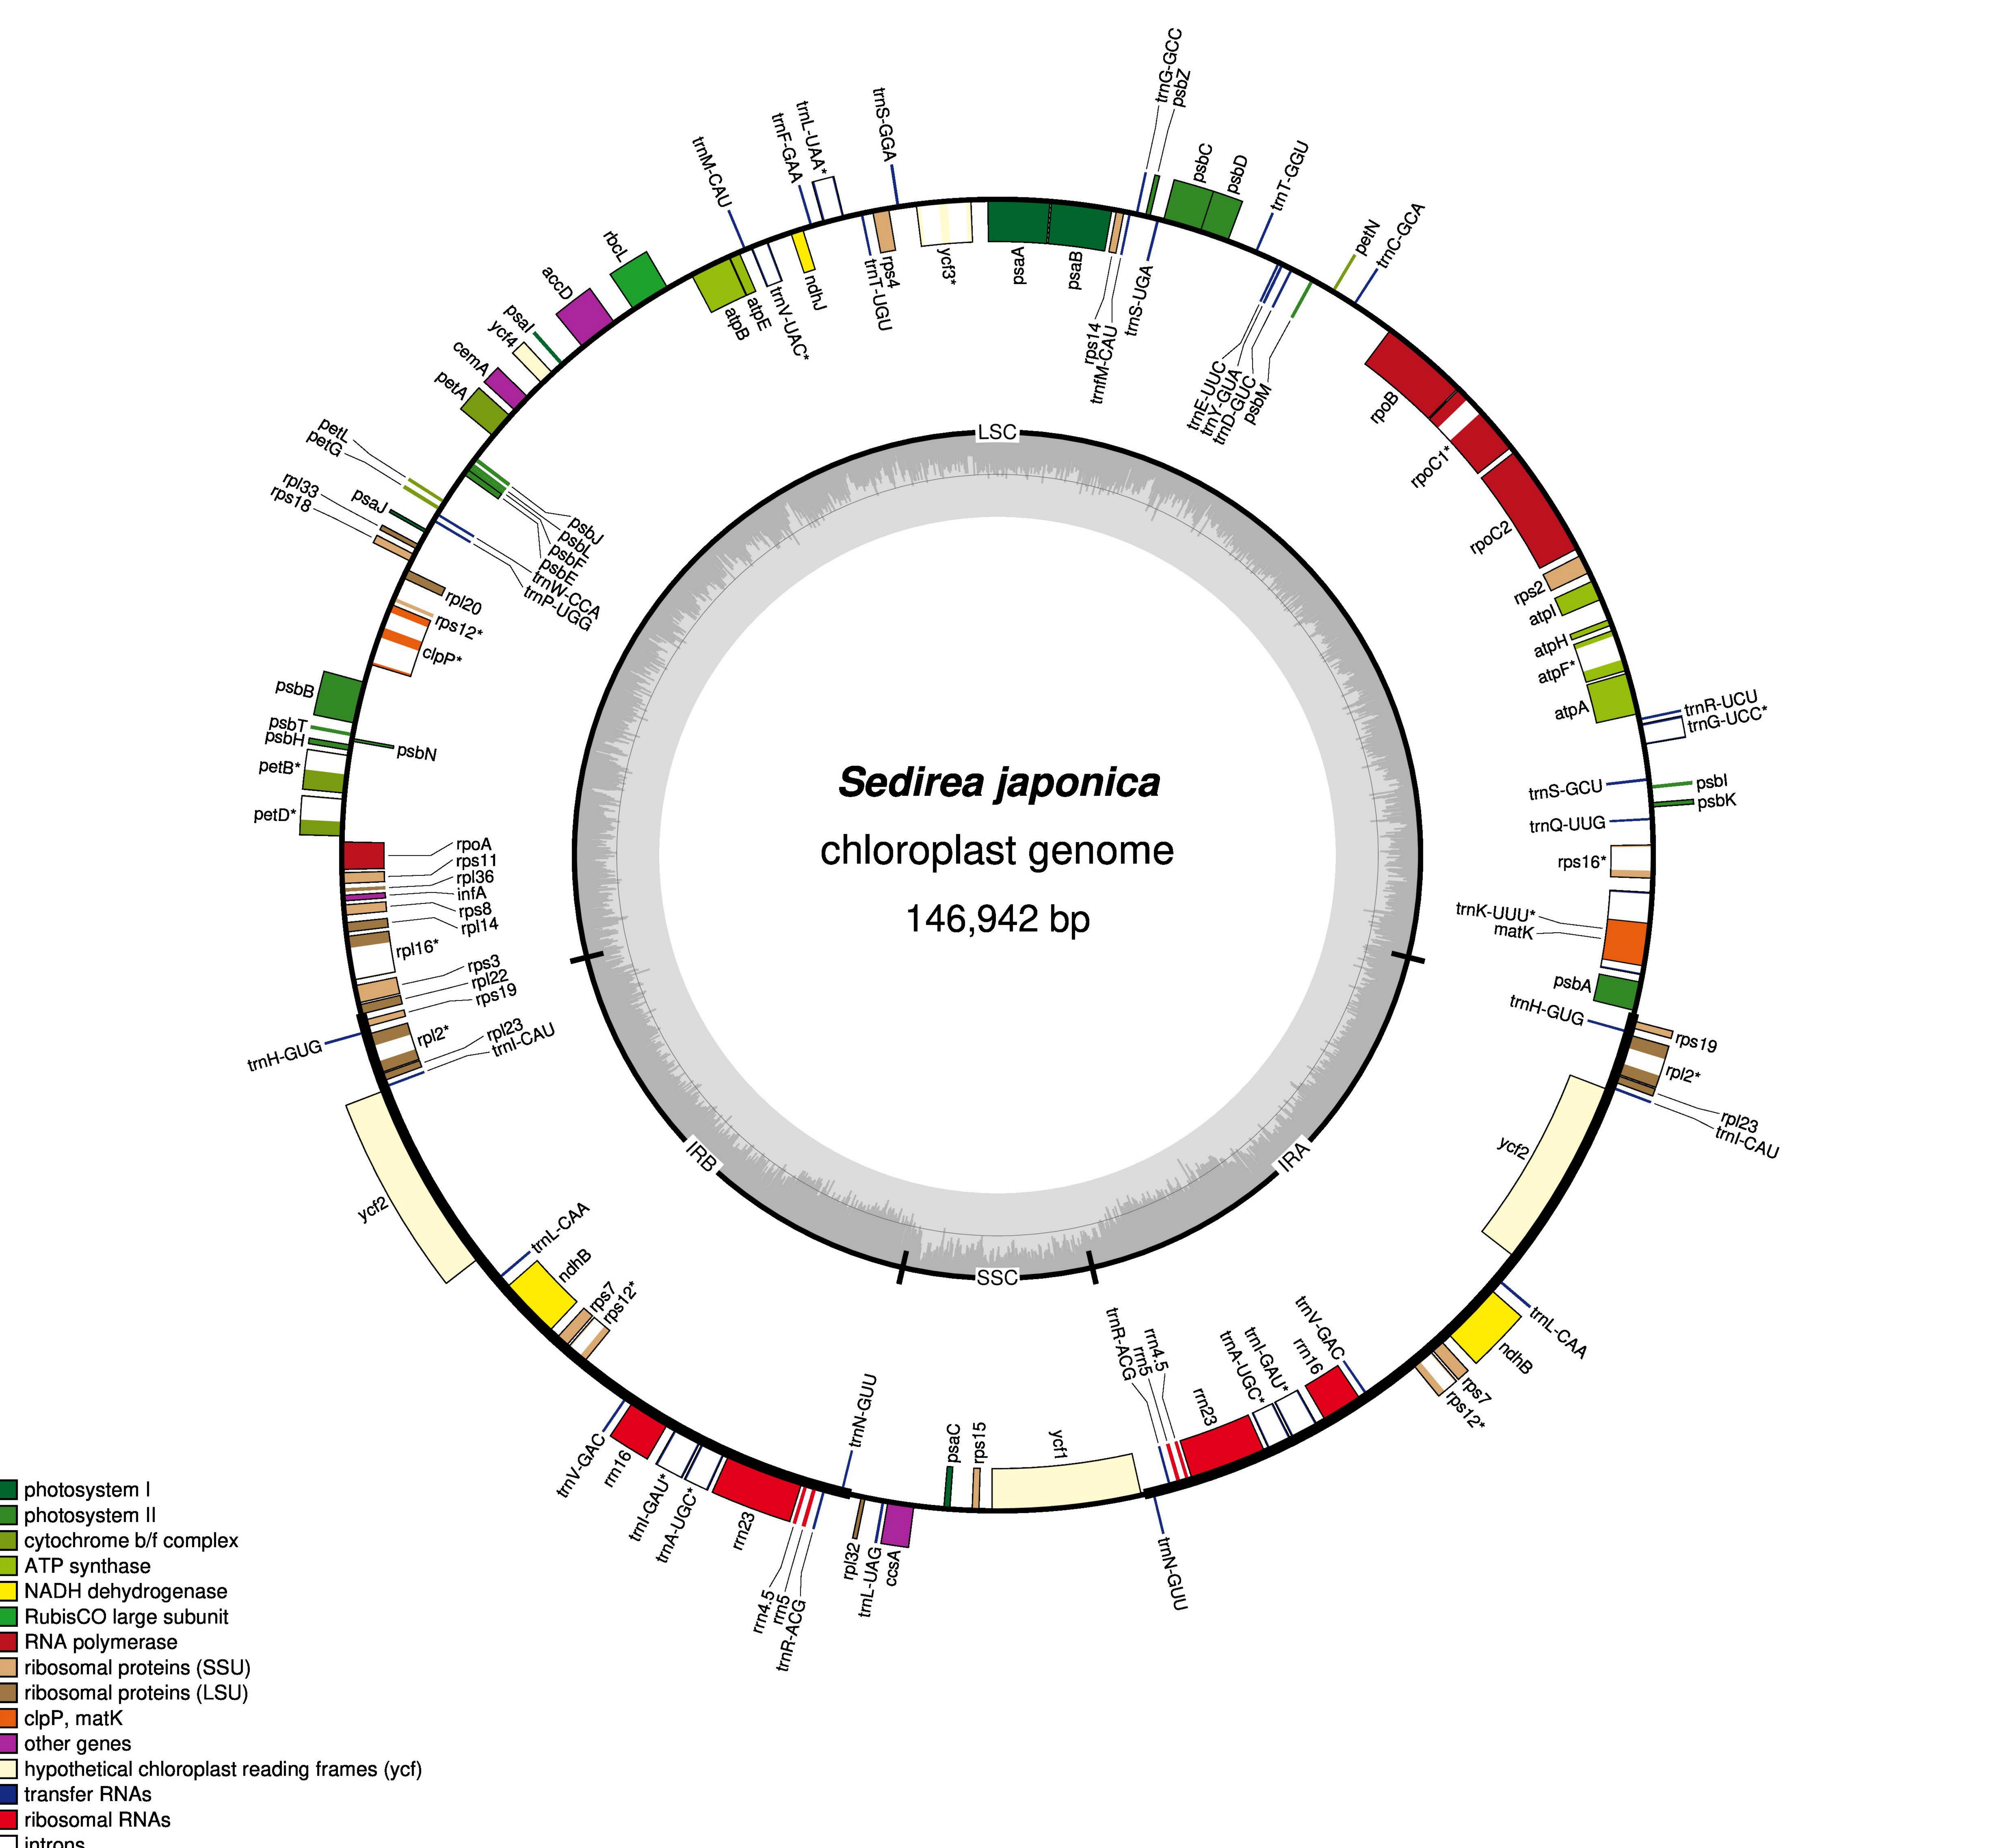

Orchidoideae  
Cranichideae

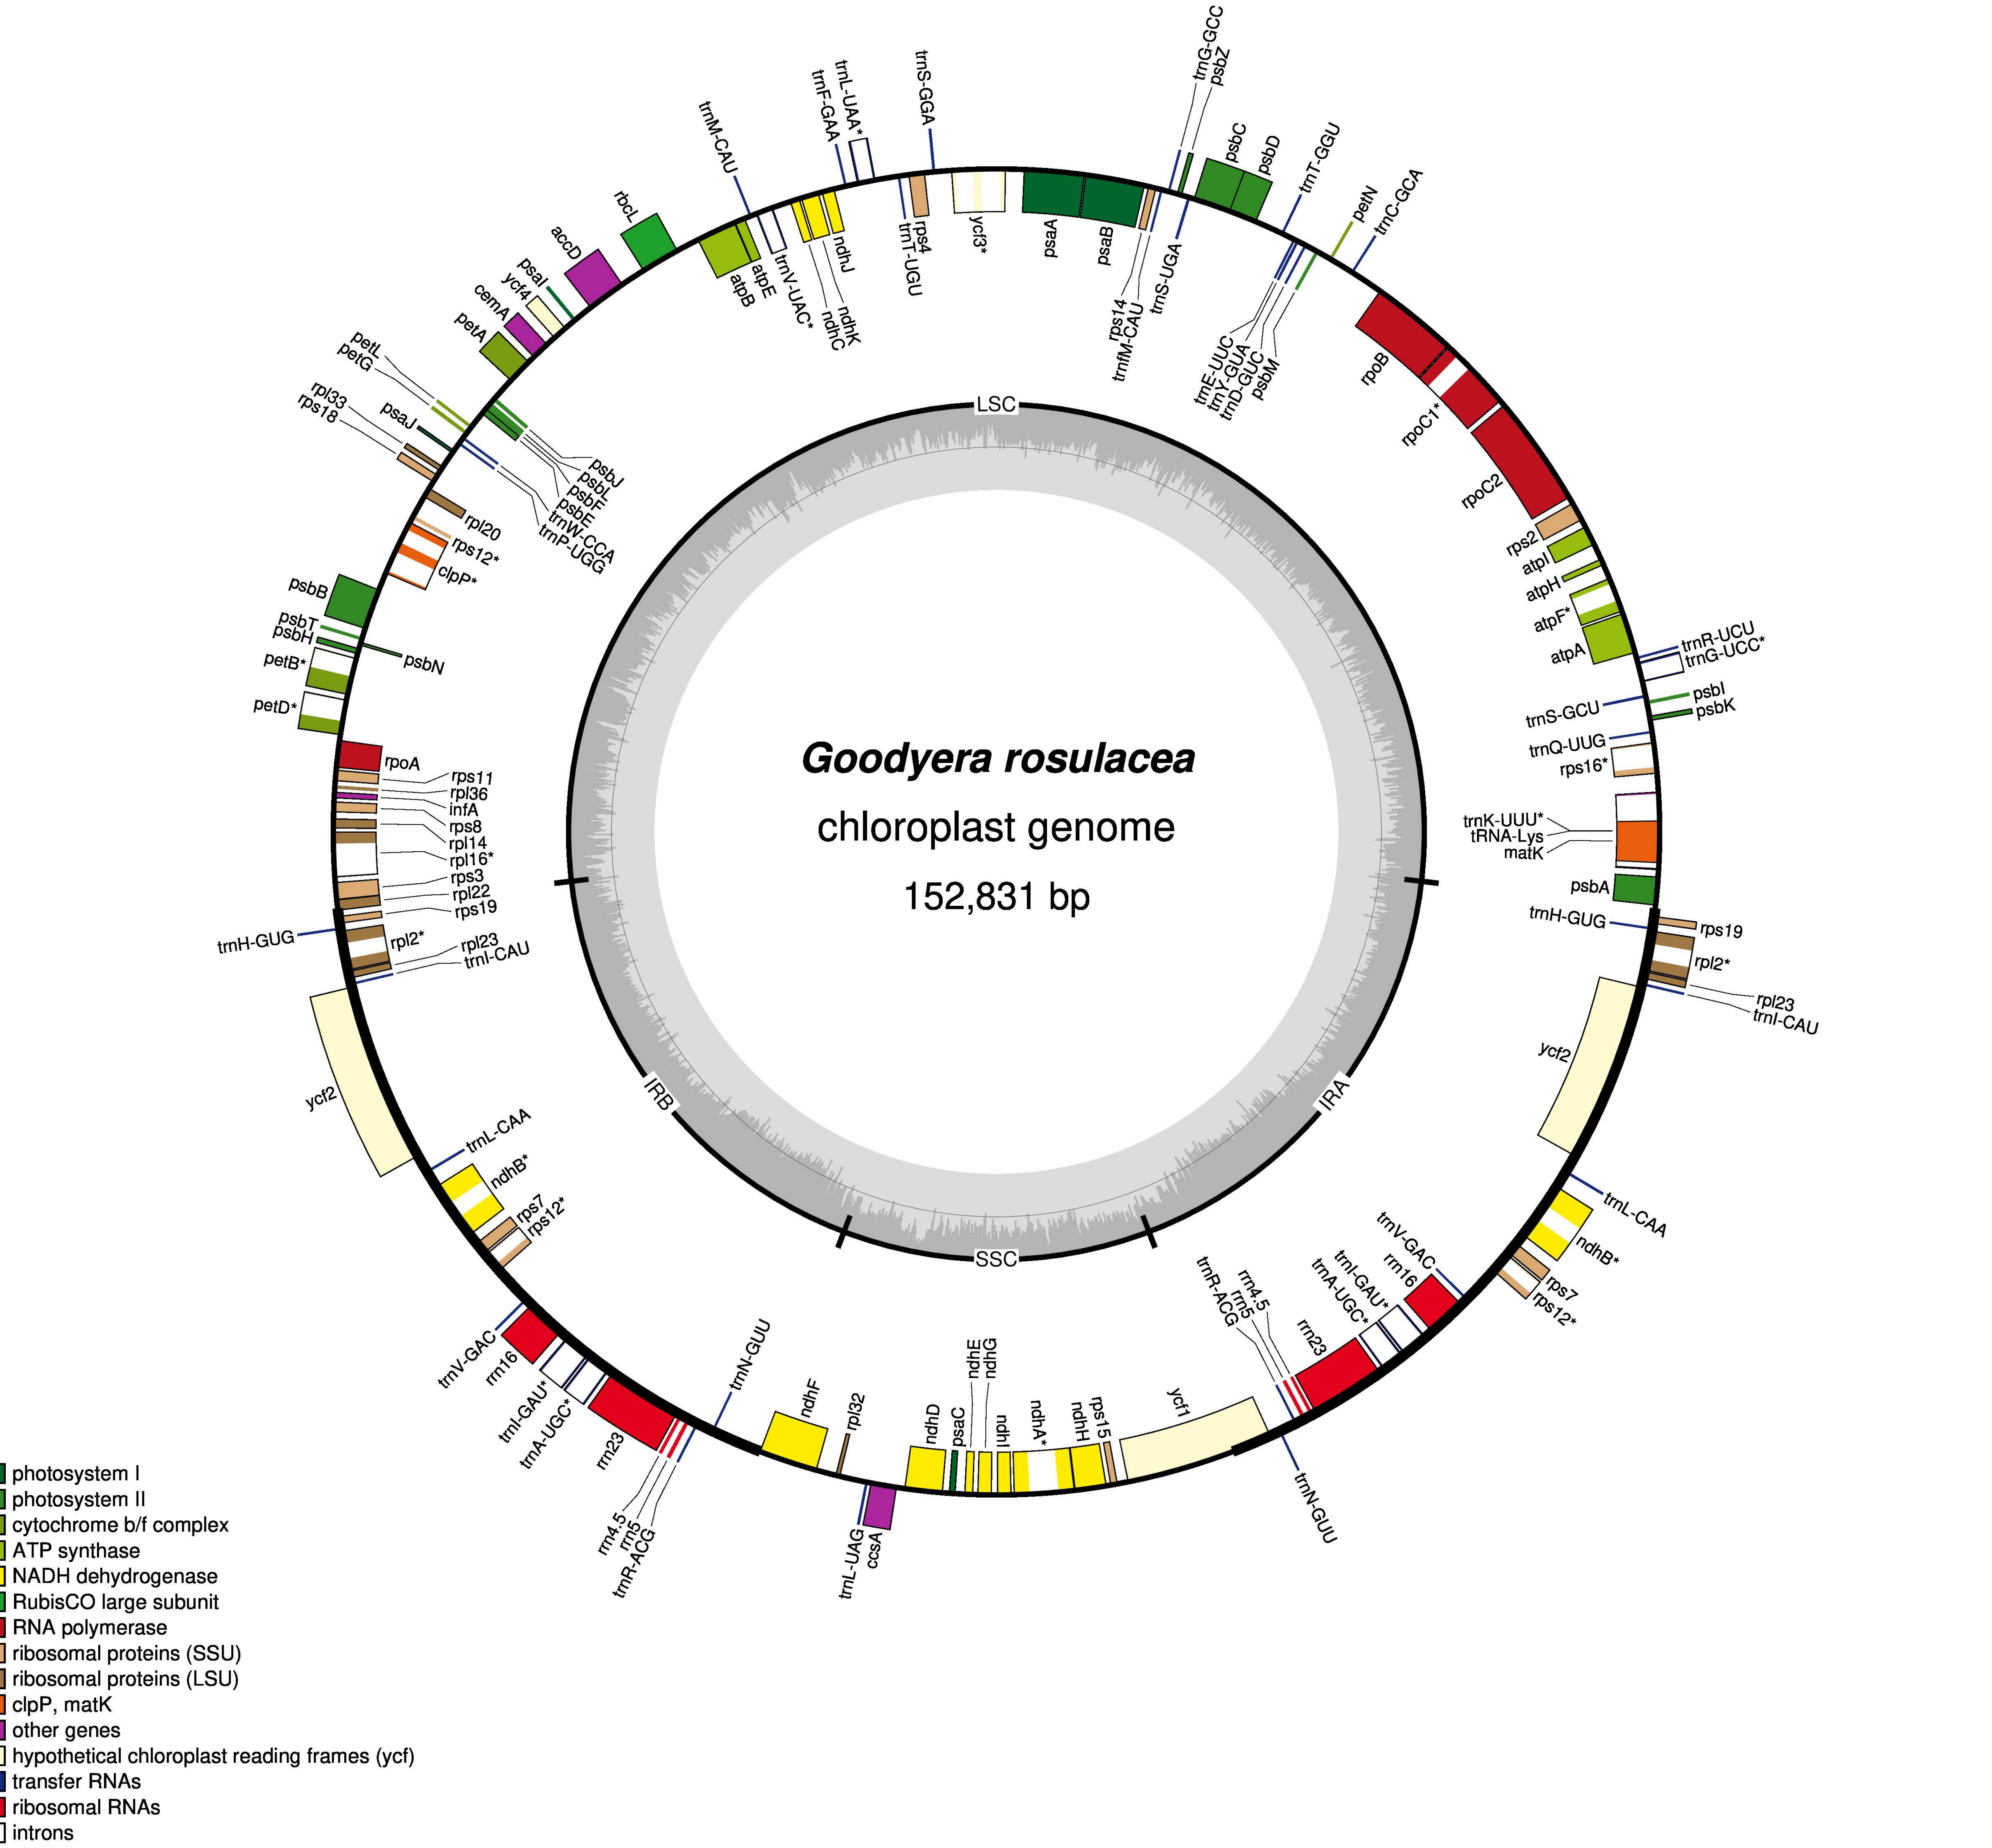

Orchidoideae  
Cranichideae

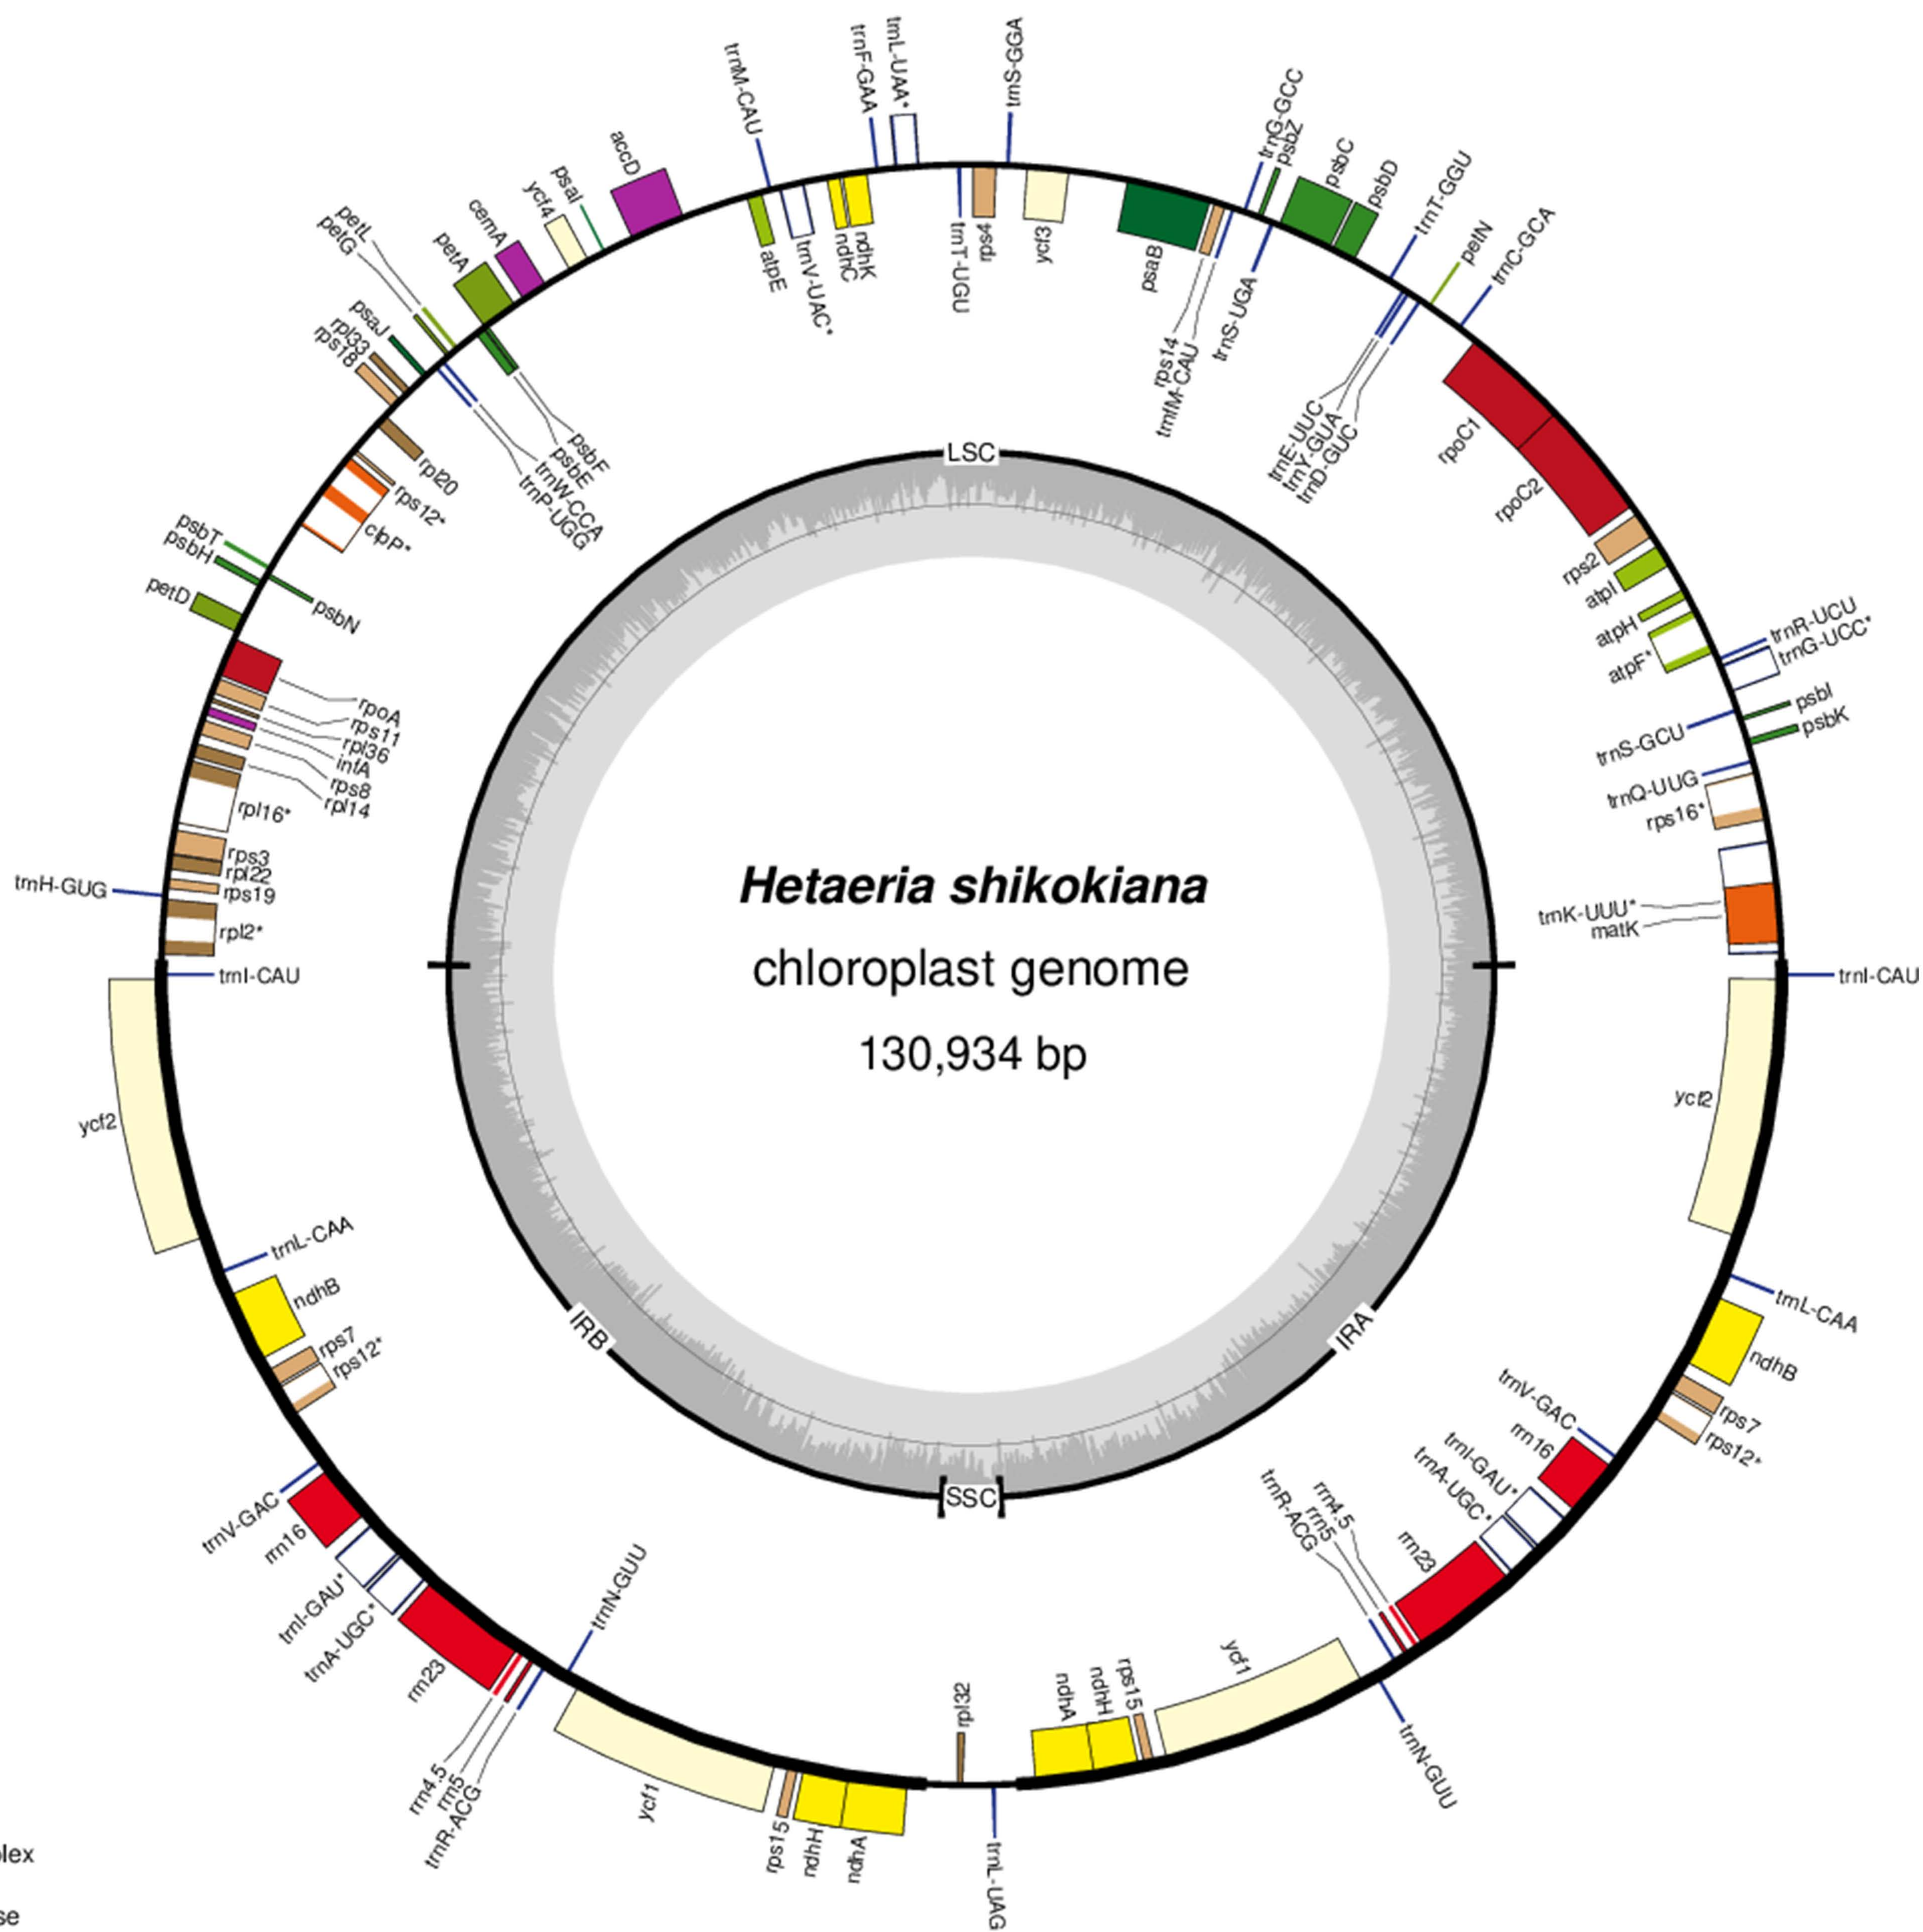

Orchidoideae  
Orchideae

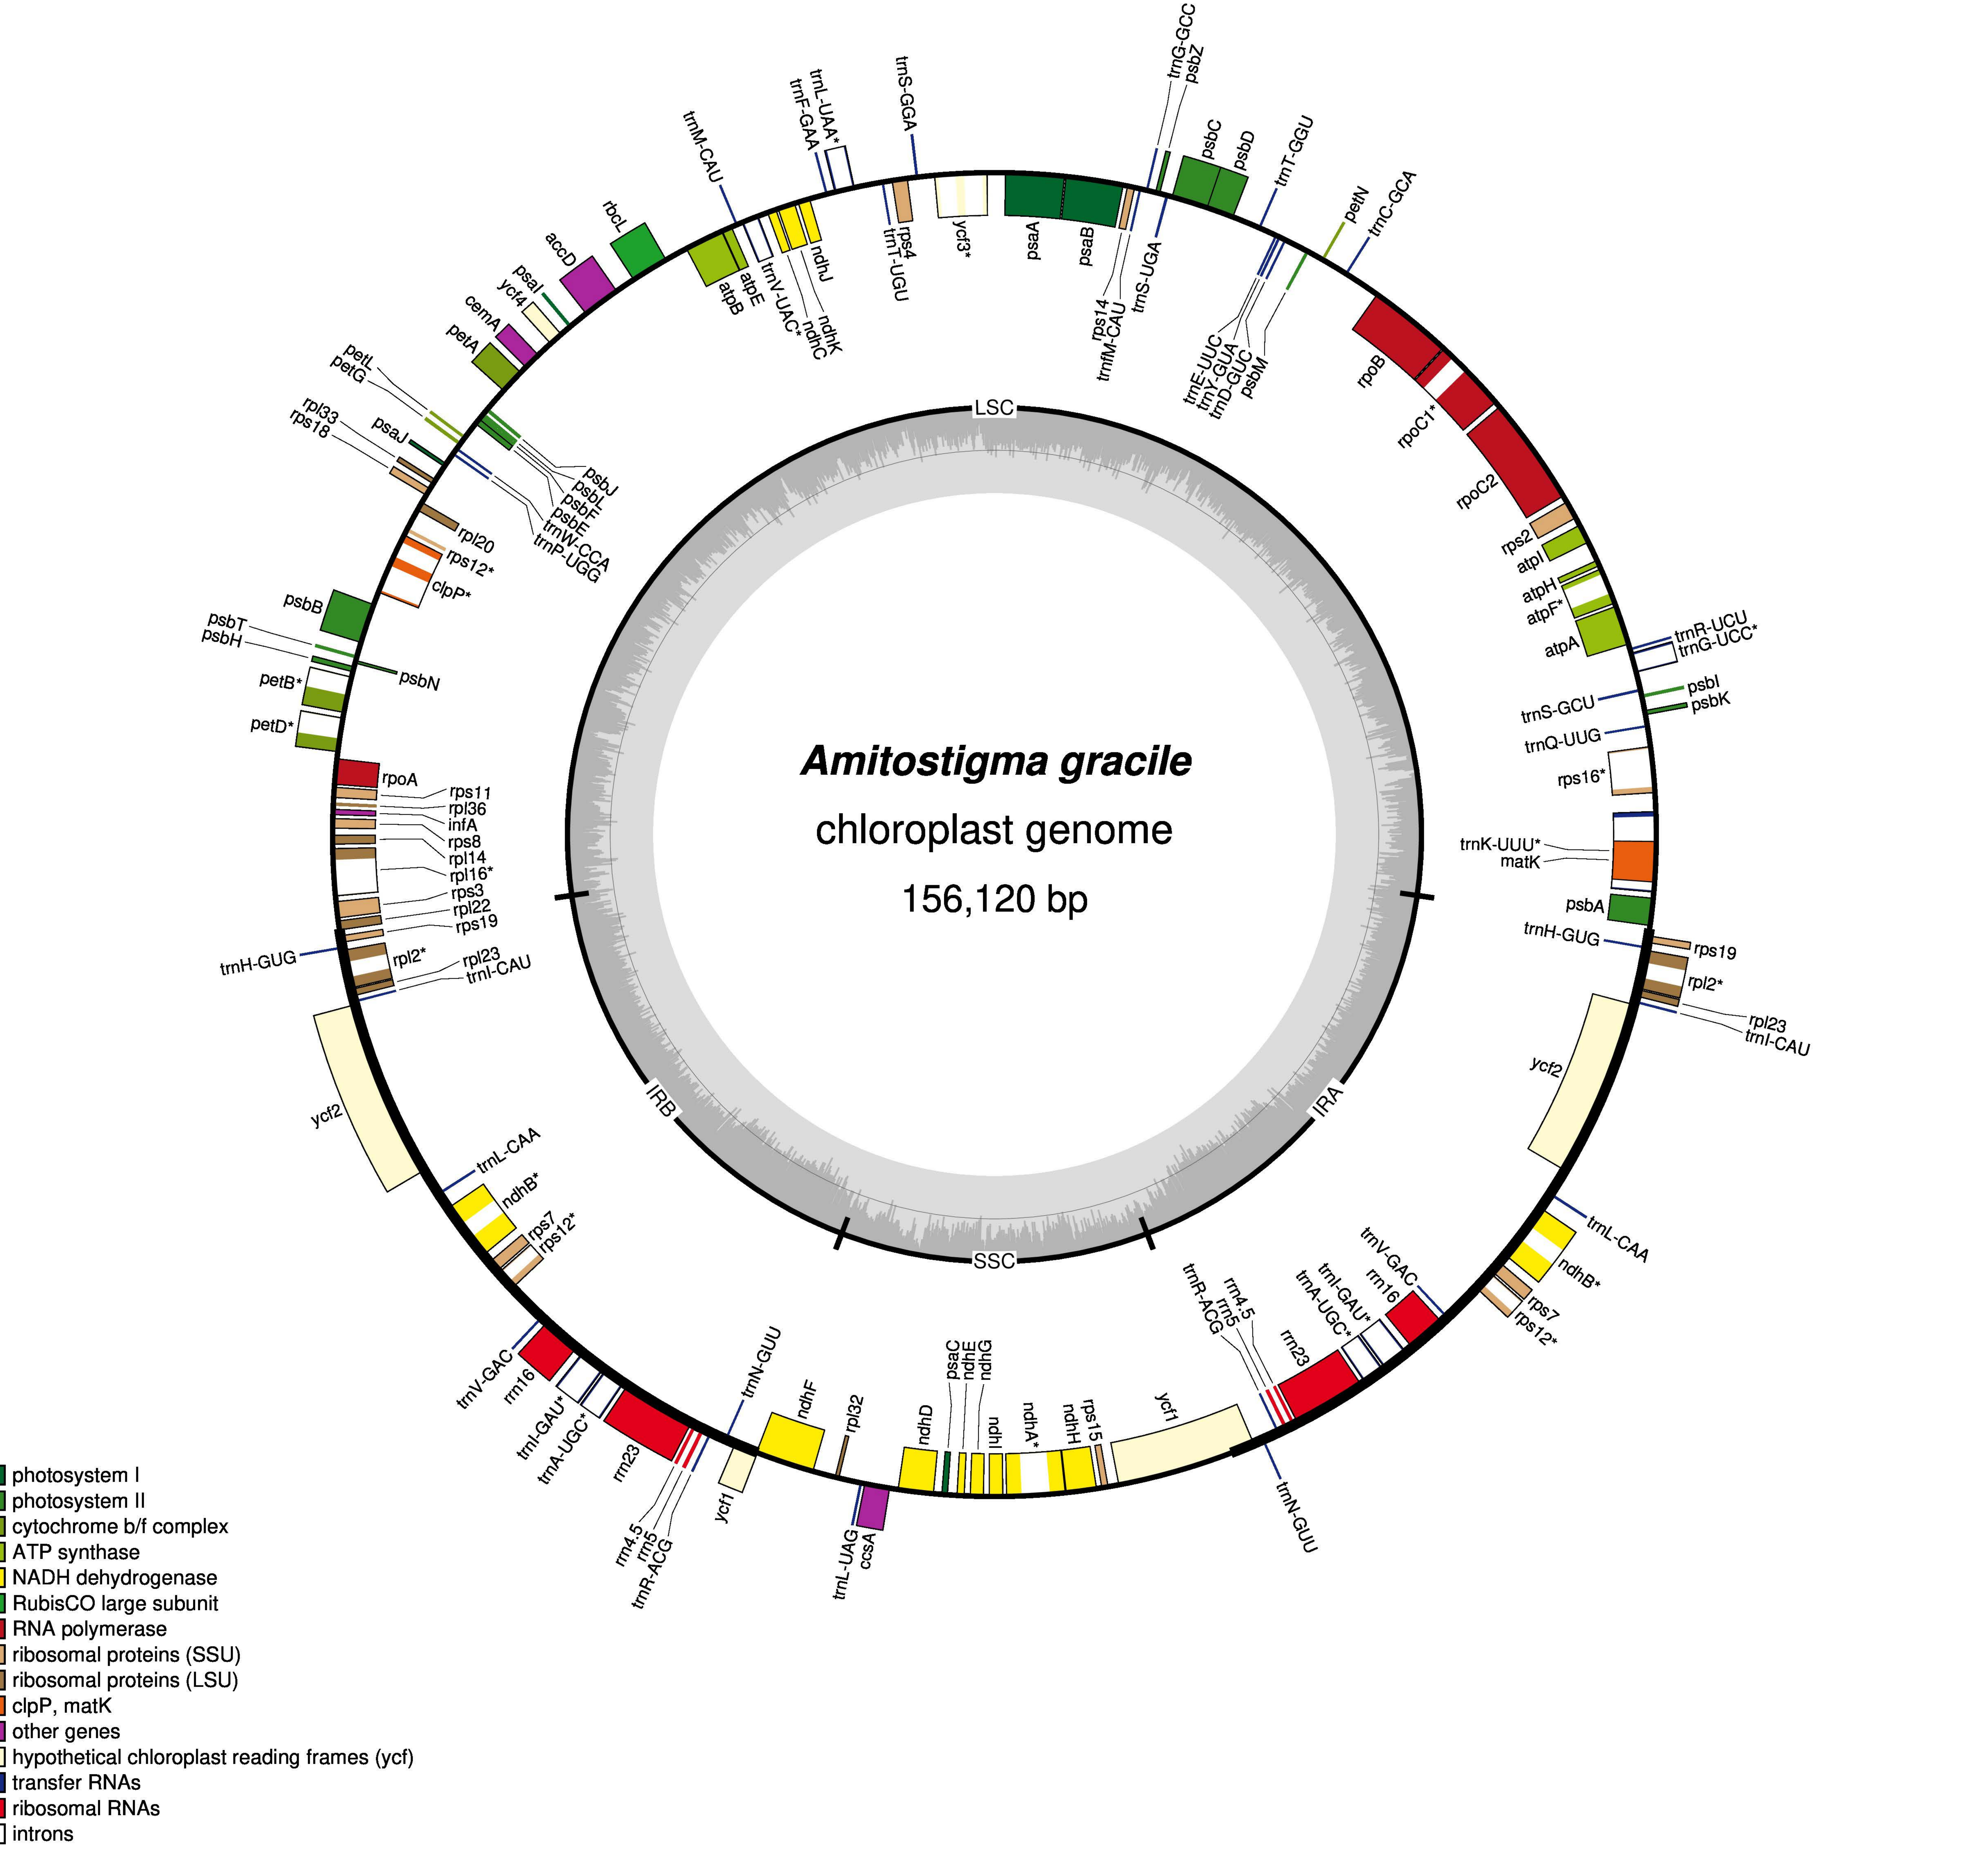

Orchidoideae  
Orchideae

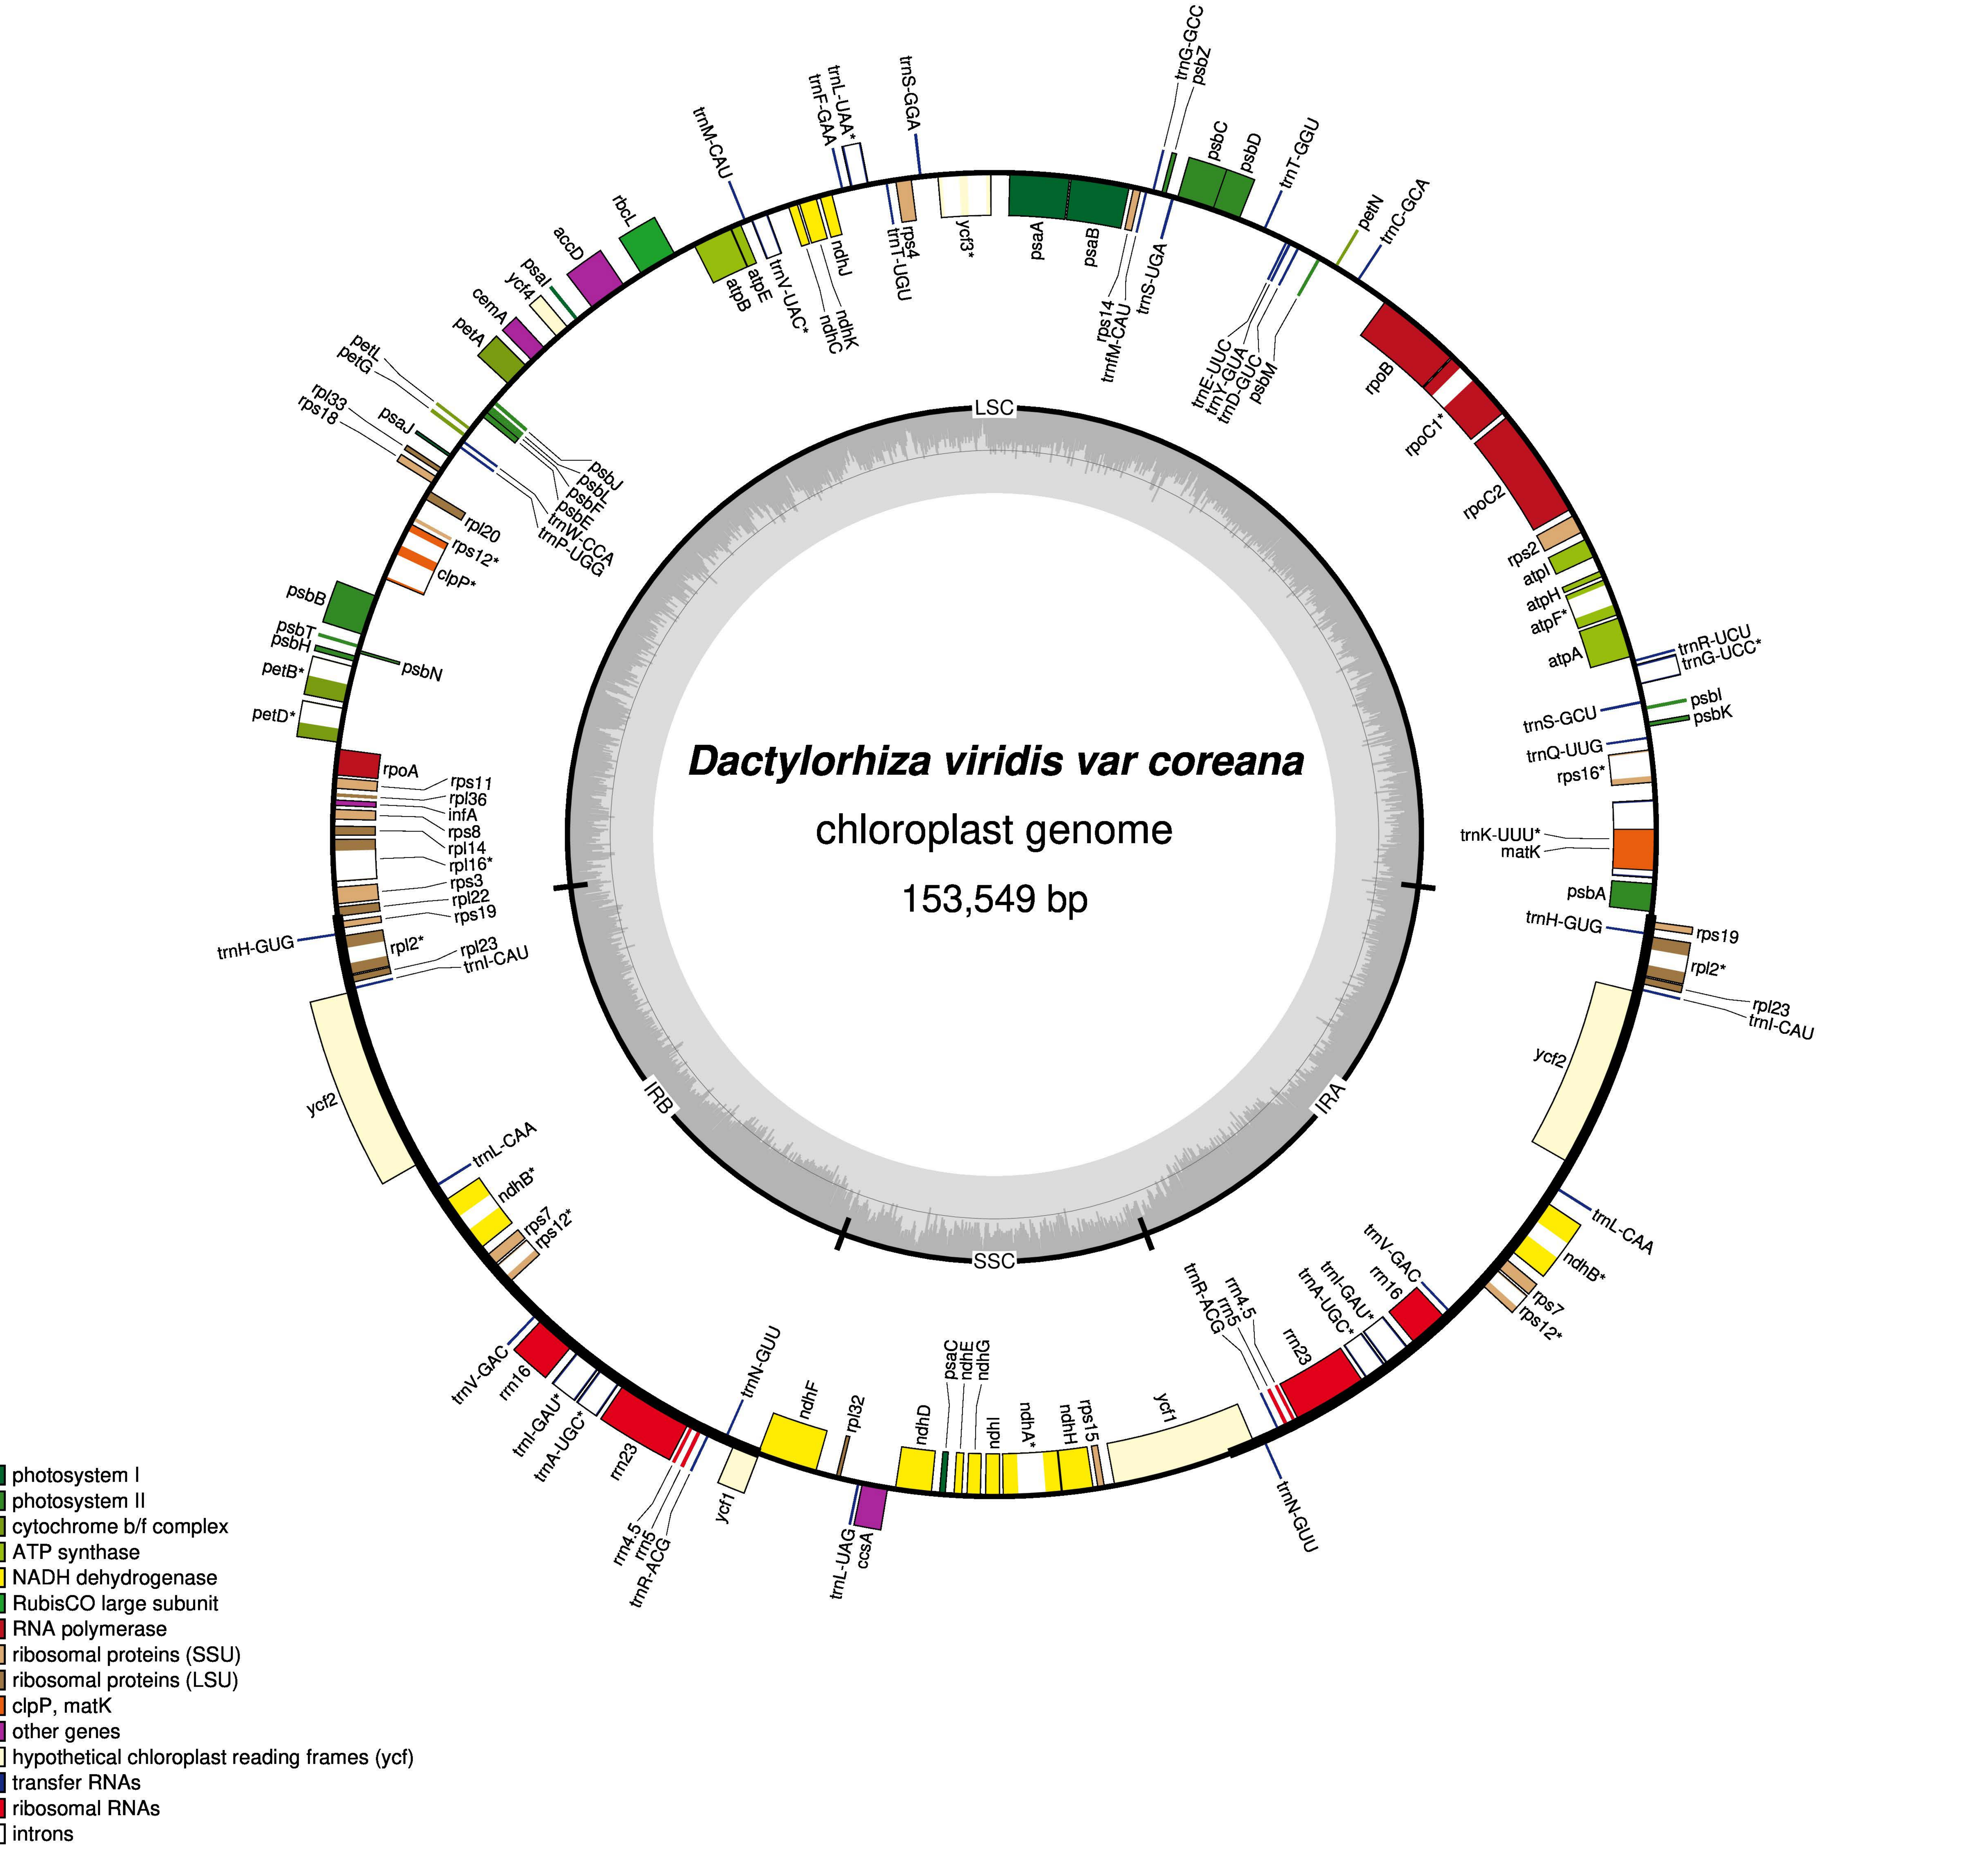

Orchidoideae  
Orchideae

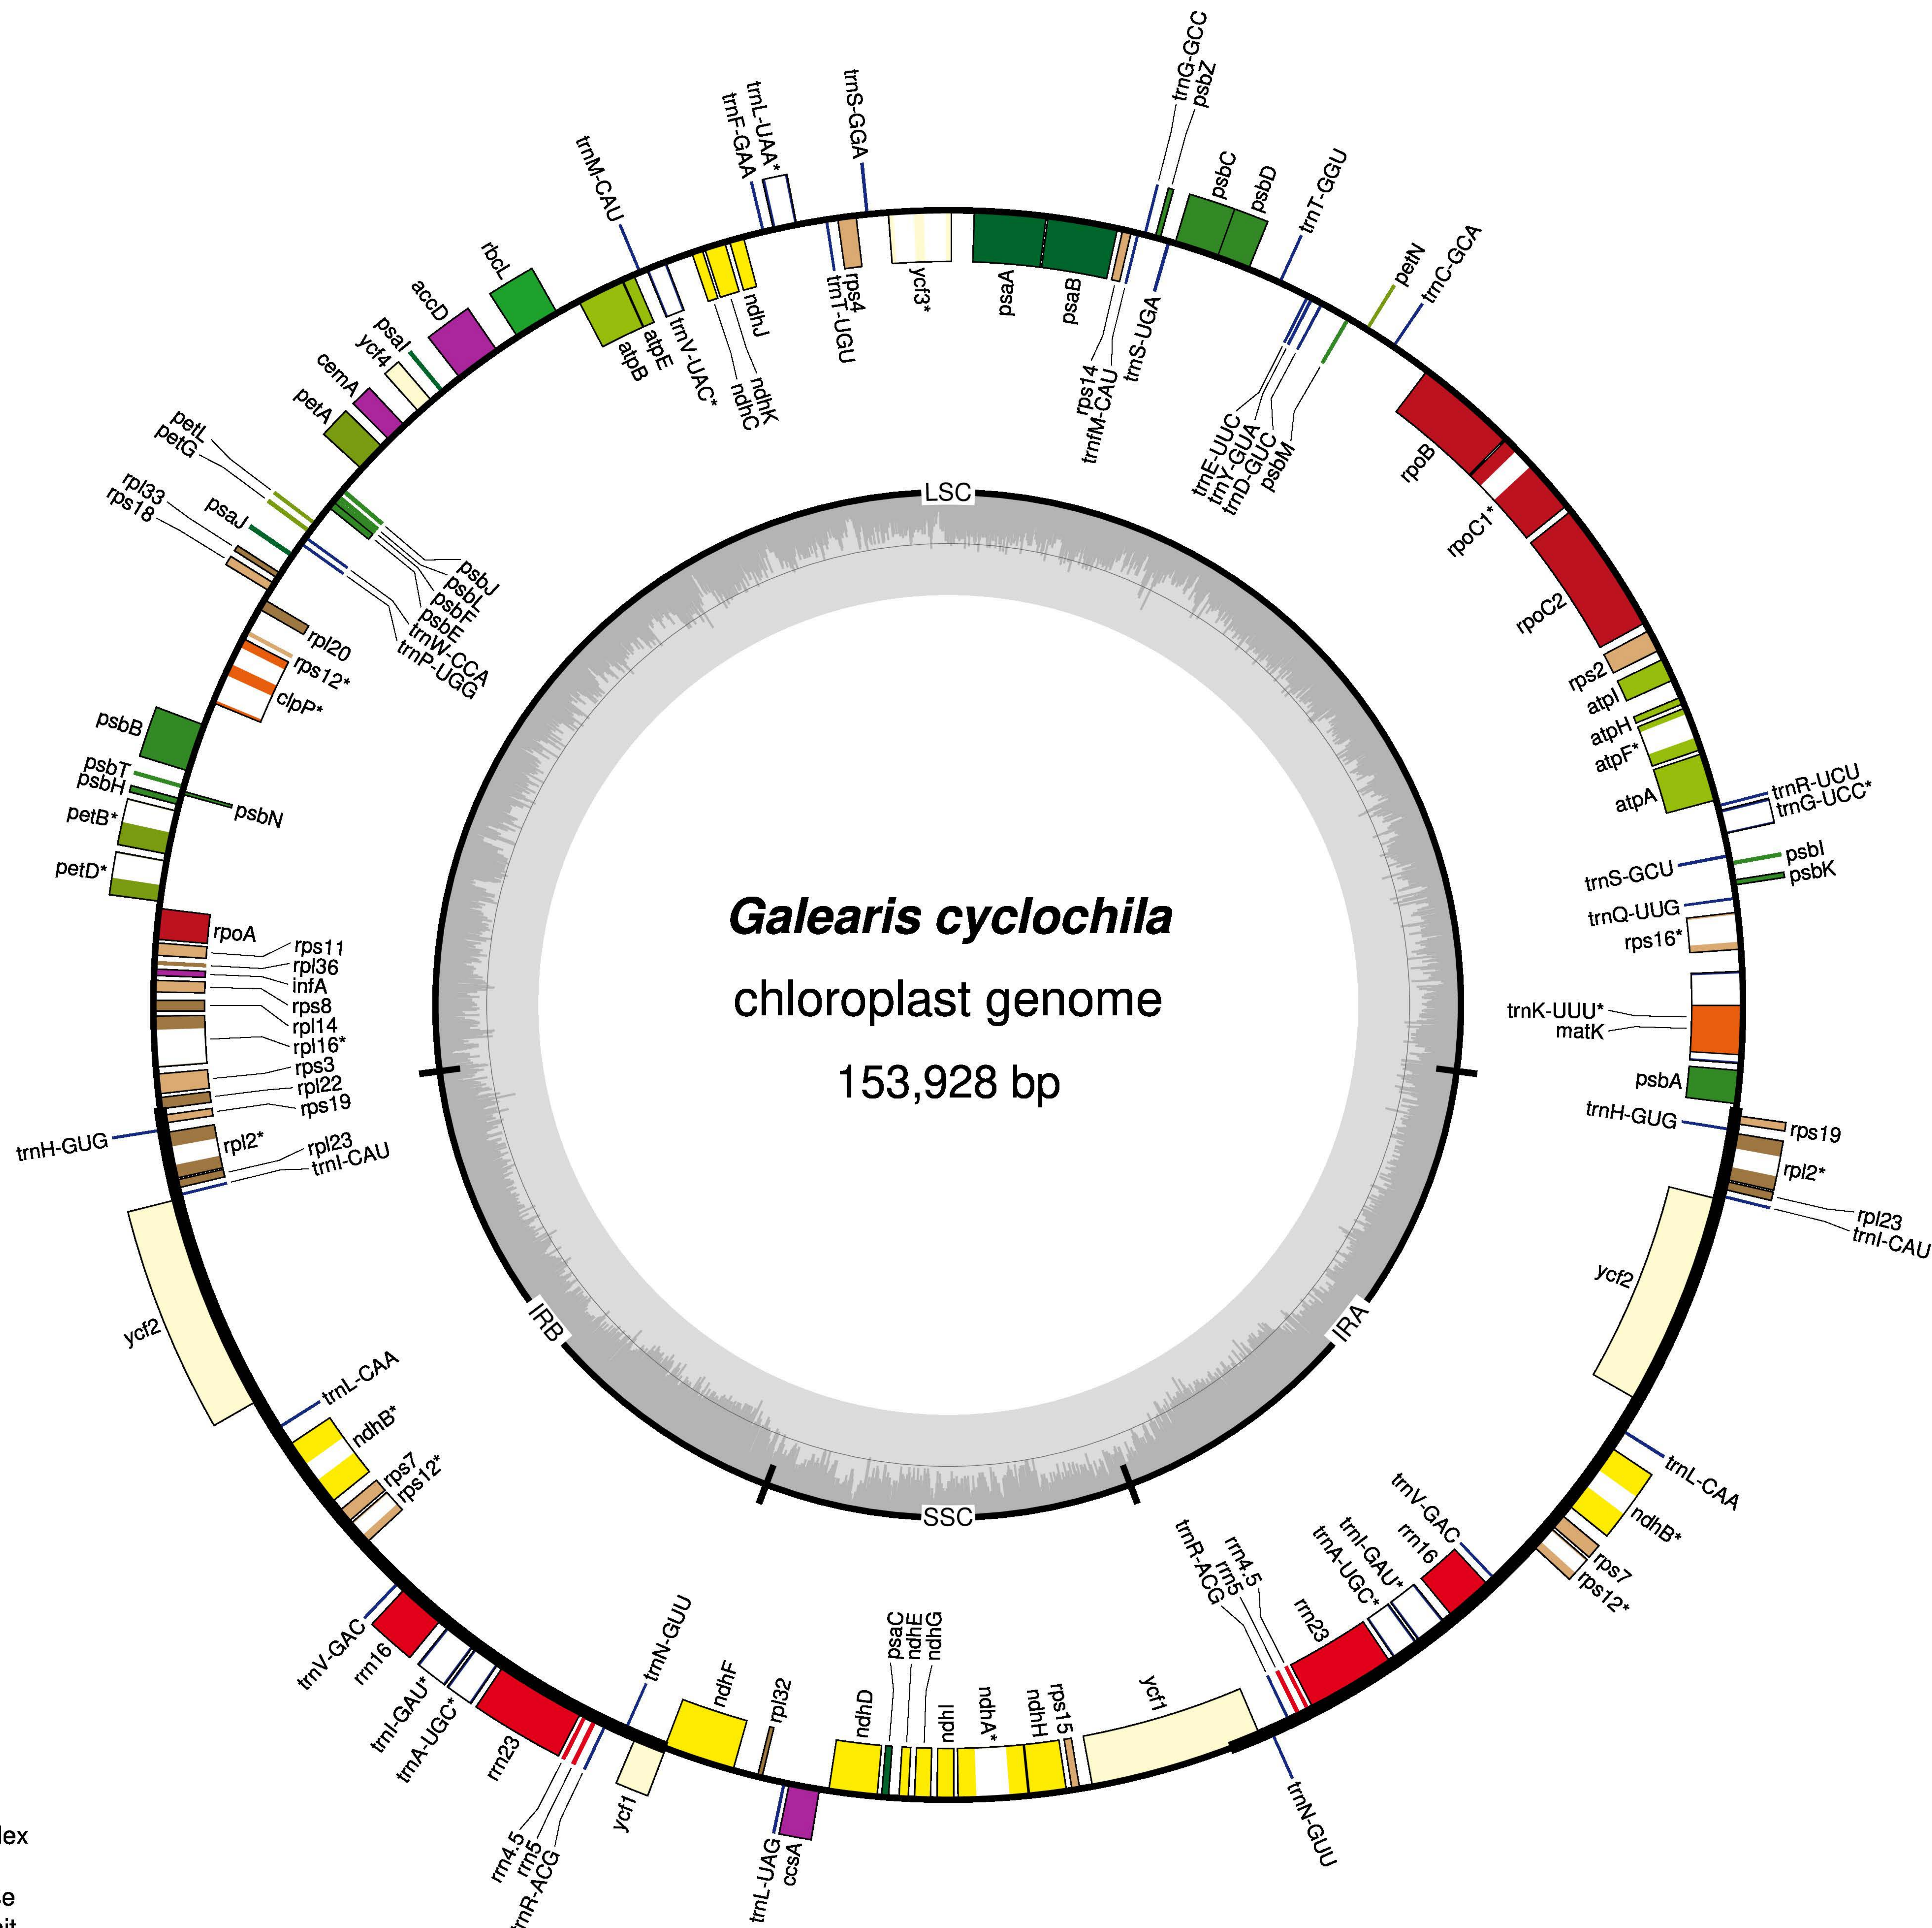

- photosystem I
- photosystem II
- cytochrome b/f complex
- ATP synthase
- NADH dehydrogenase
- RubisCO large subunit
- RNA polymerase
- ribosomal proteins (SSU)
- ribosomal proteins (LSU)
- clpP, matK
- other genes
- hypothetical chloroplast reading frames (ycf)
- transfer RNAs
- ribosomal RNAs
- introns

Orchidoideae  
Orchideae

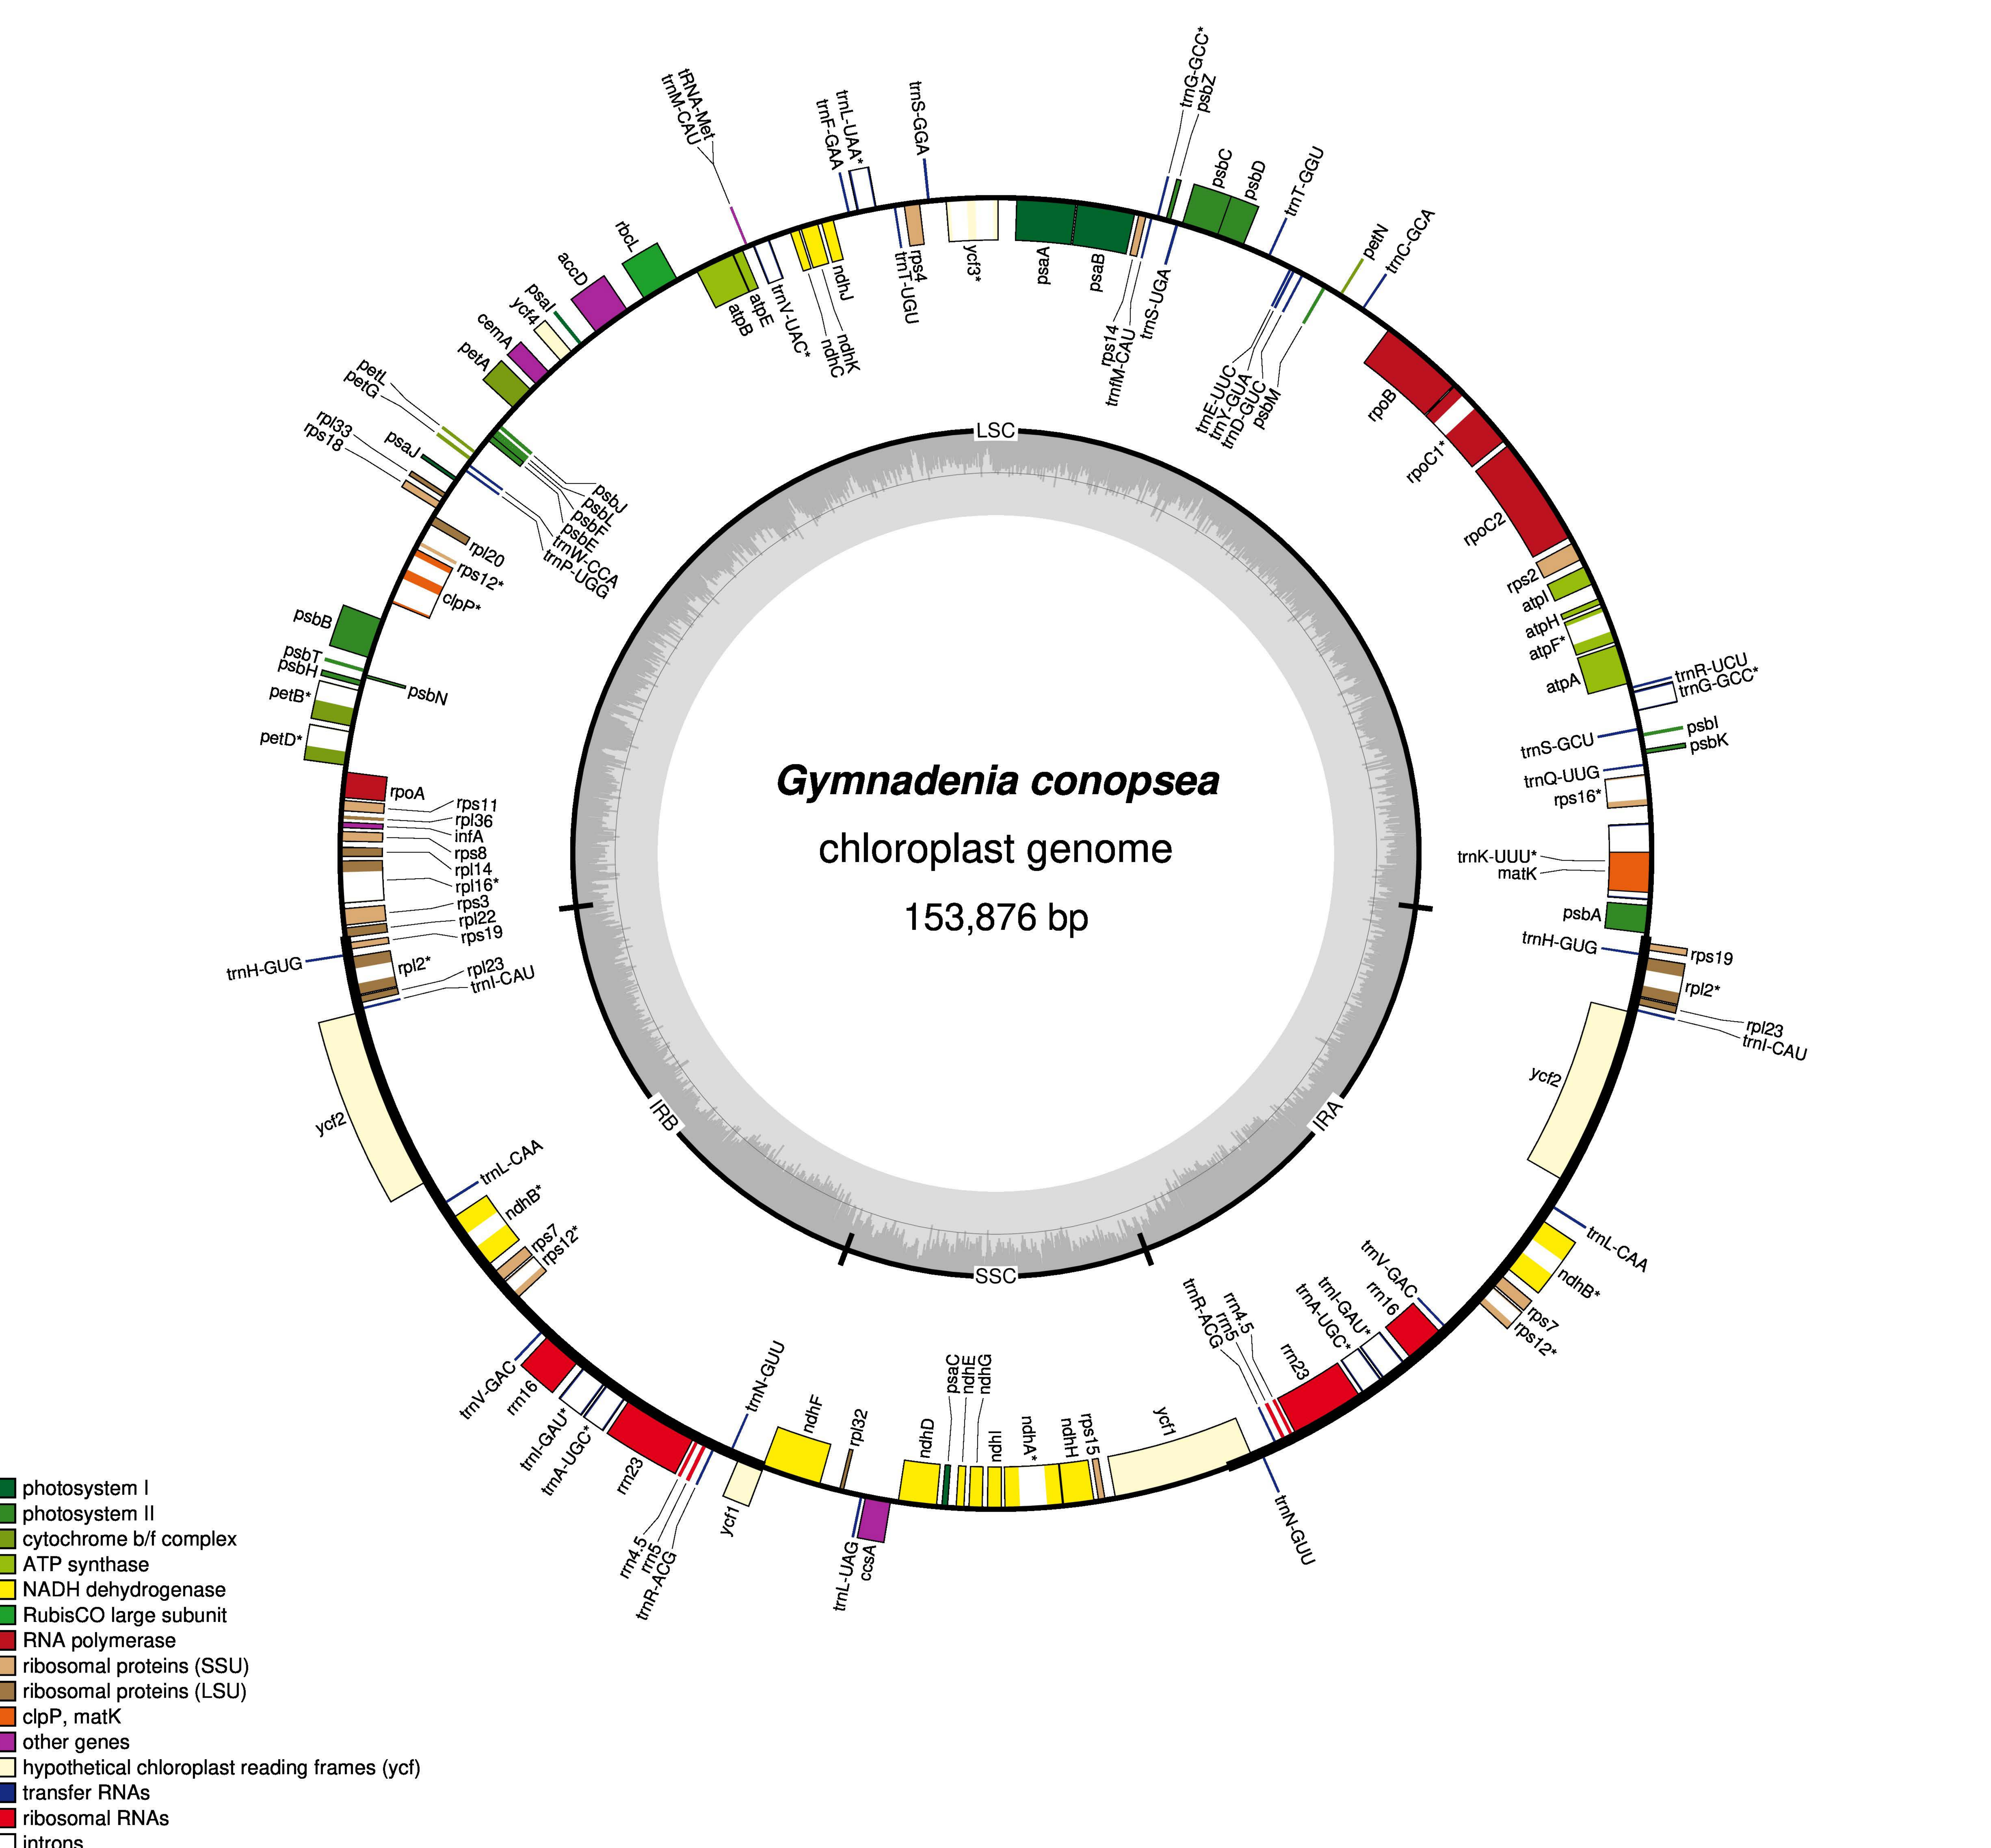

Orchidoideae  
Orchideae

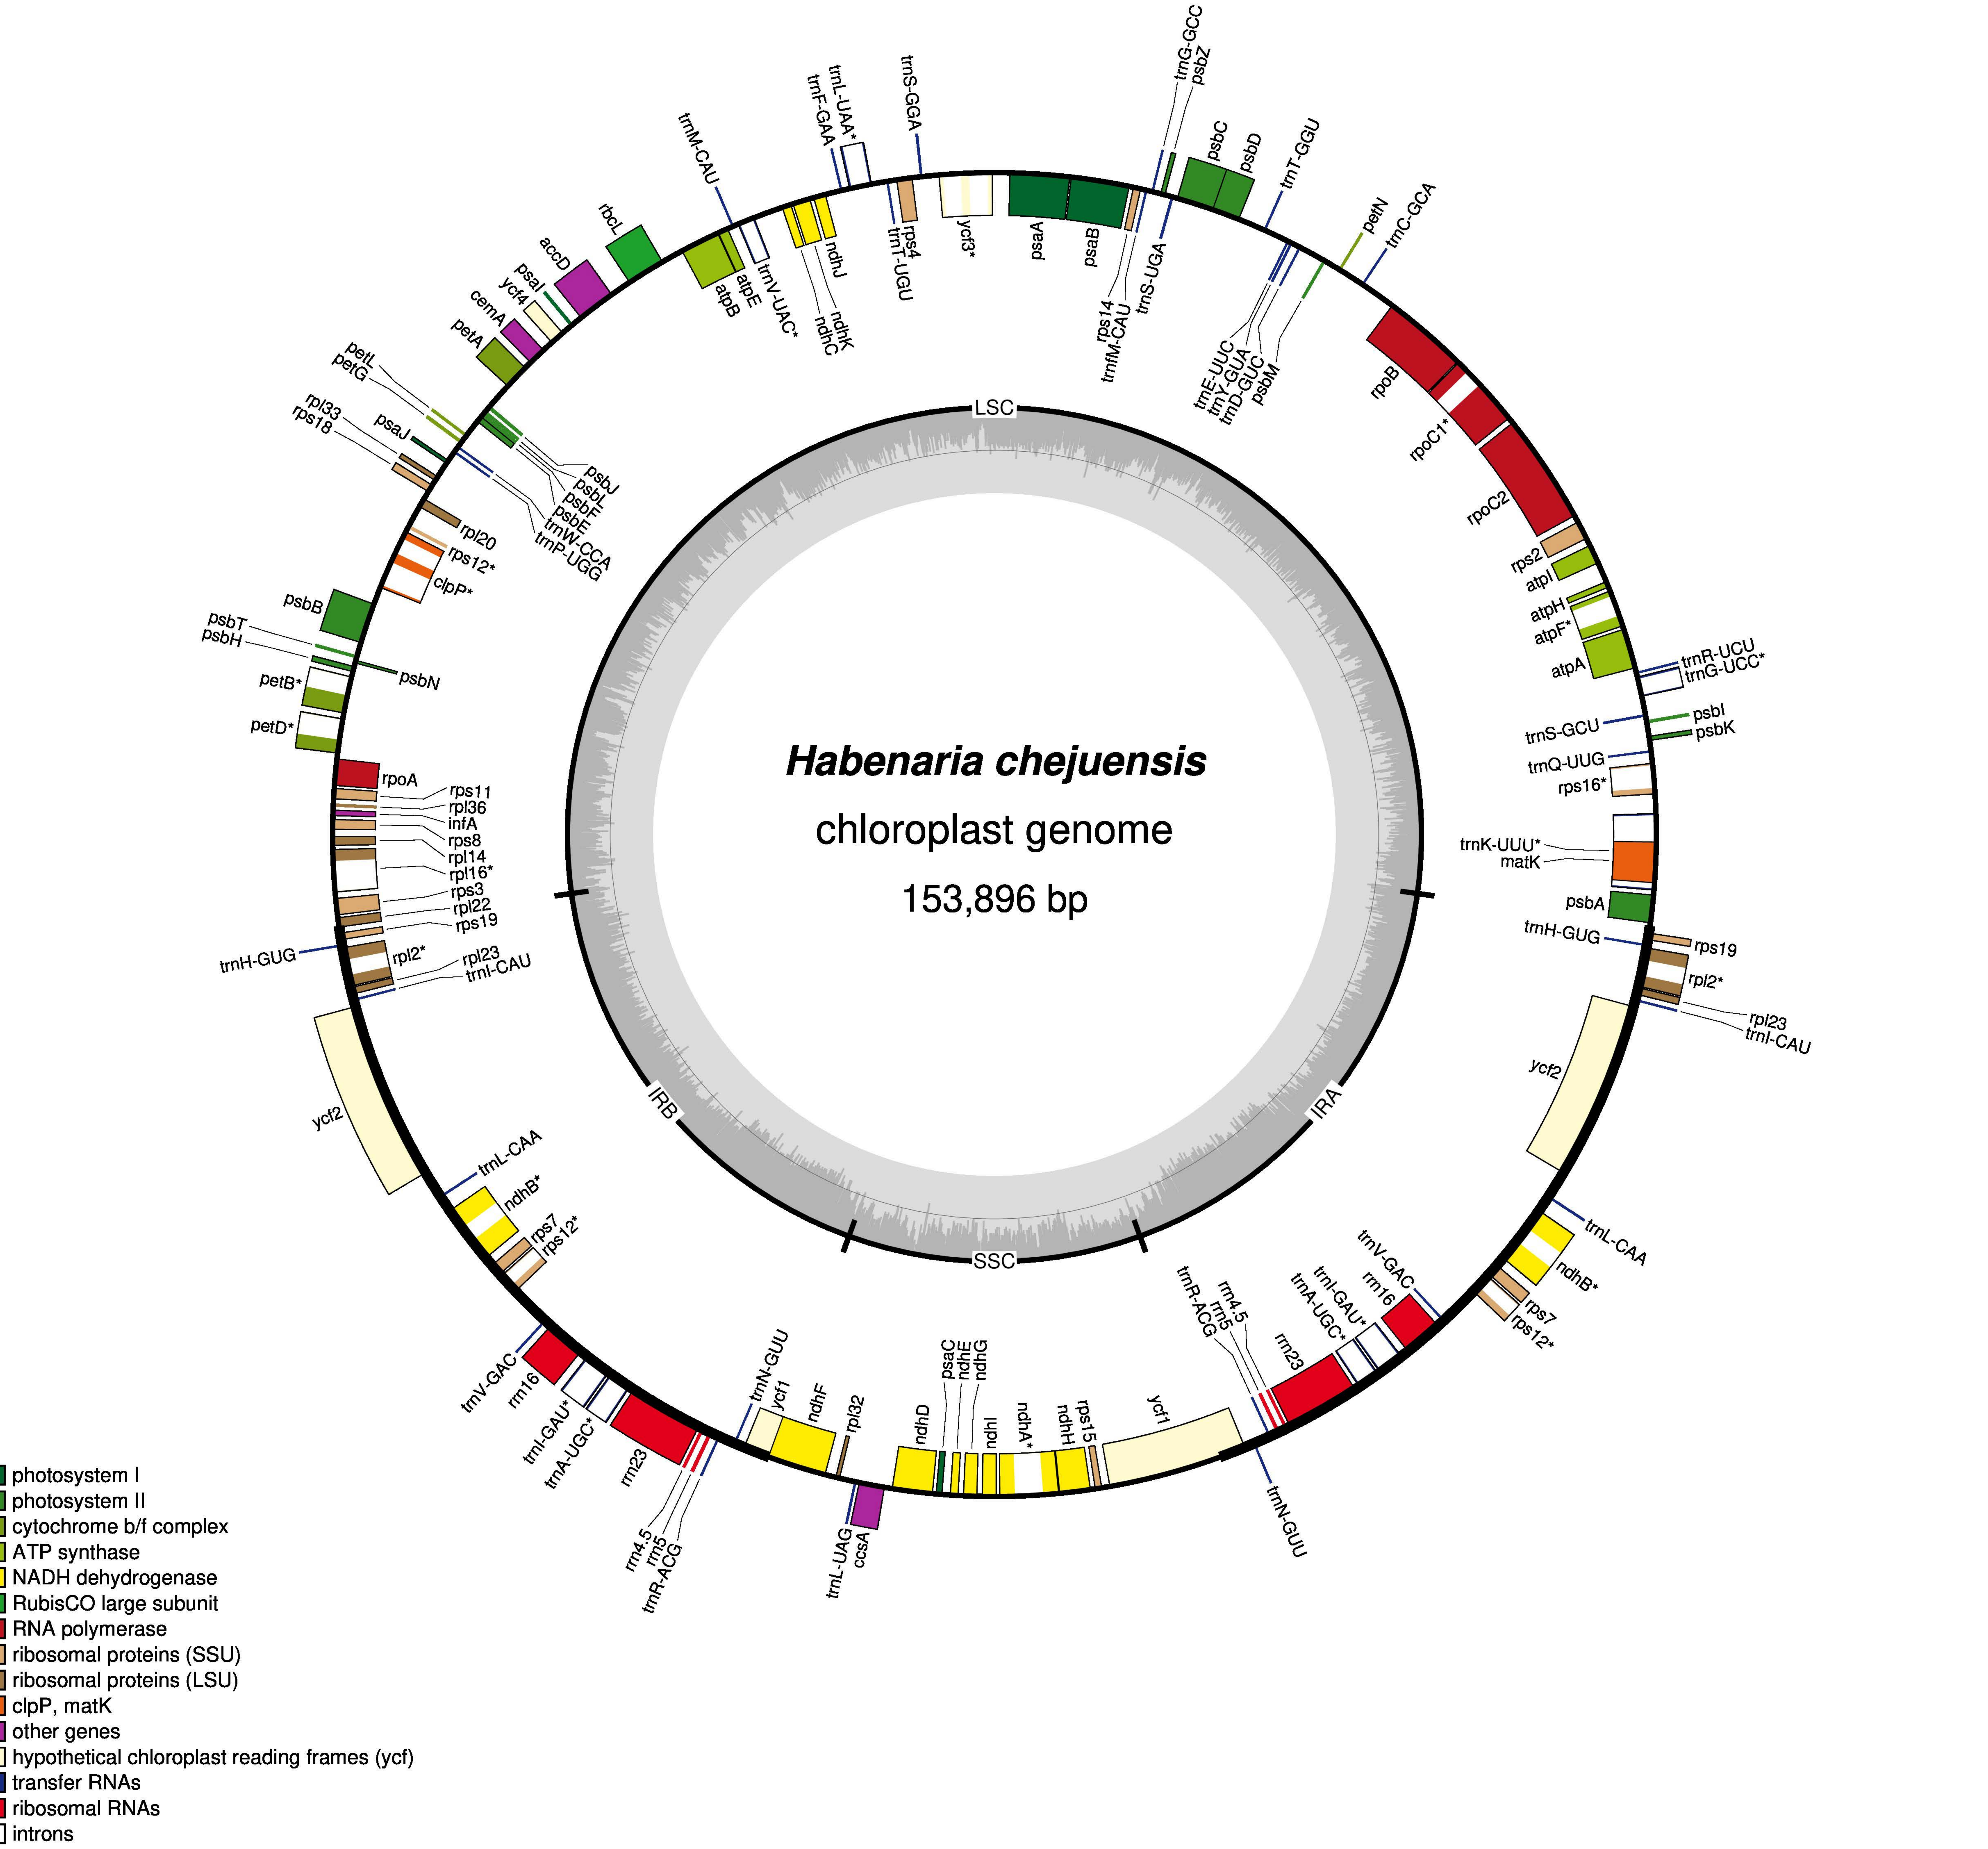

Orchidoideae  
Orchideae

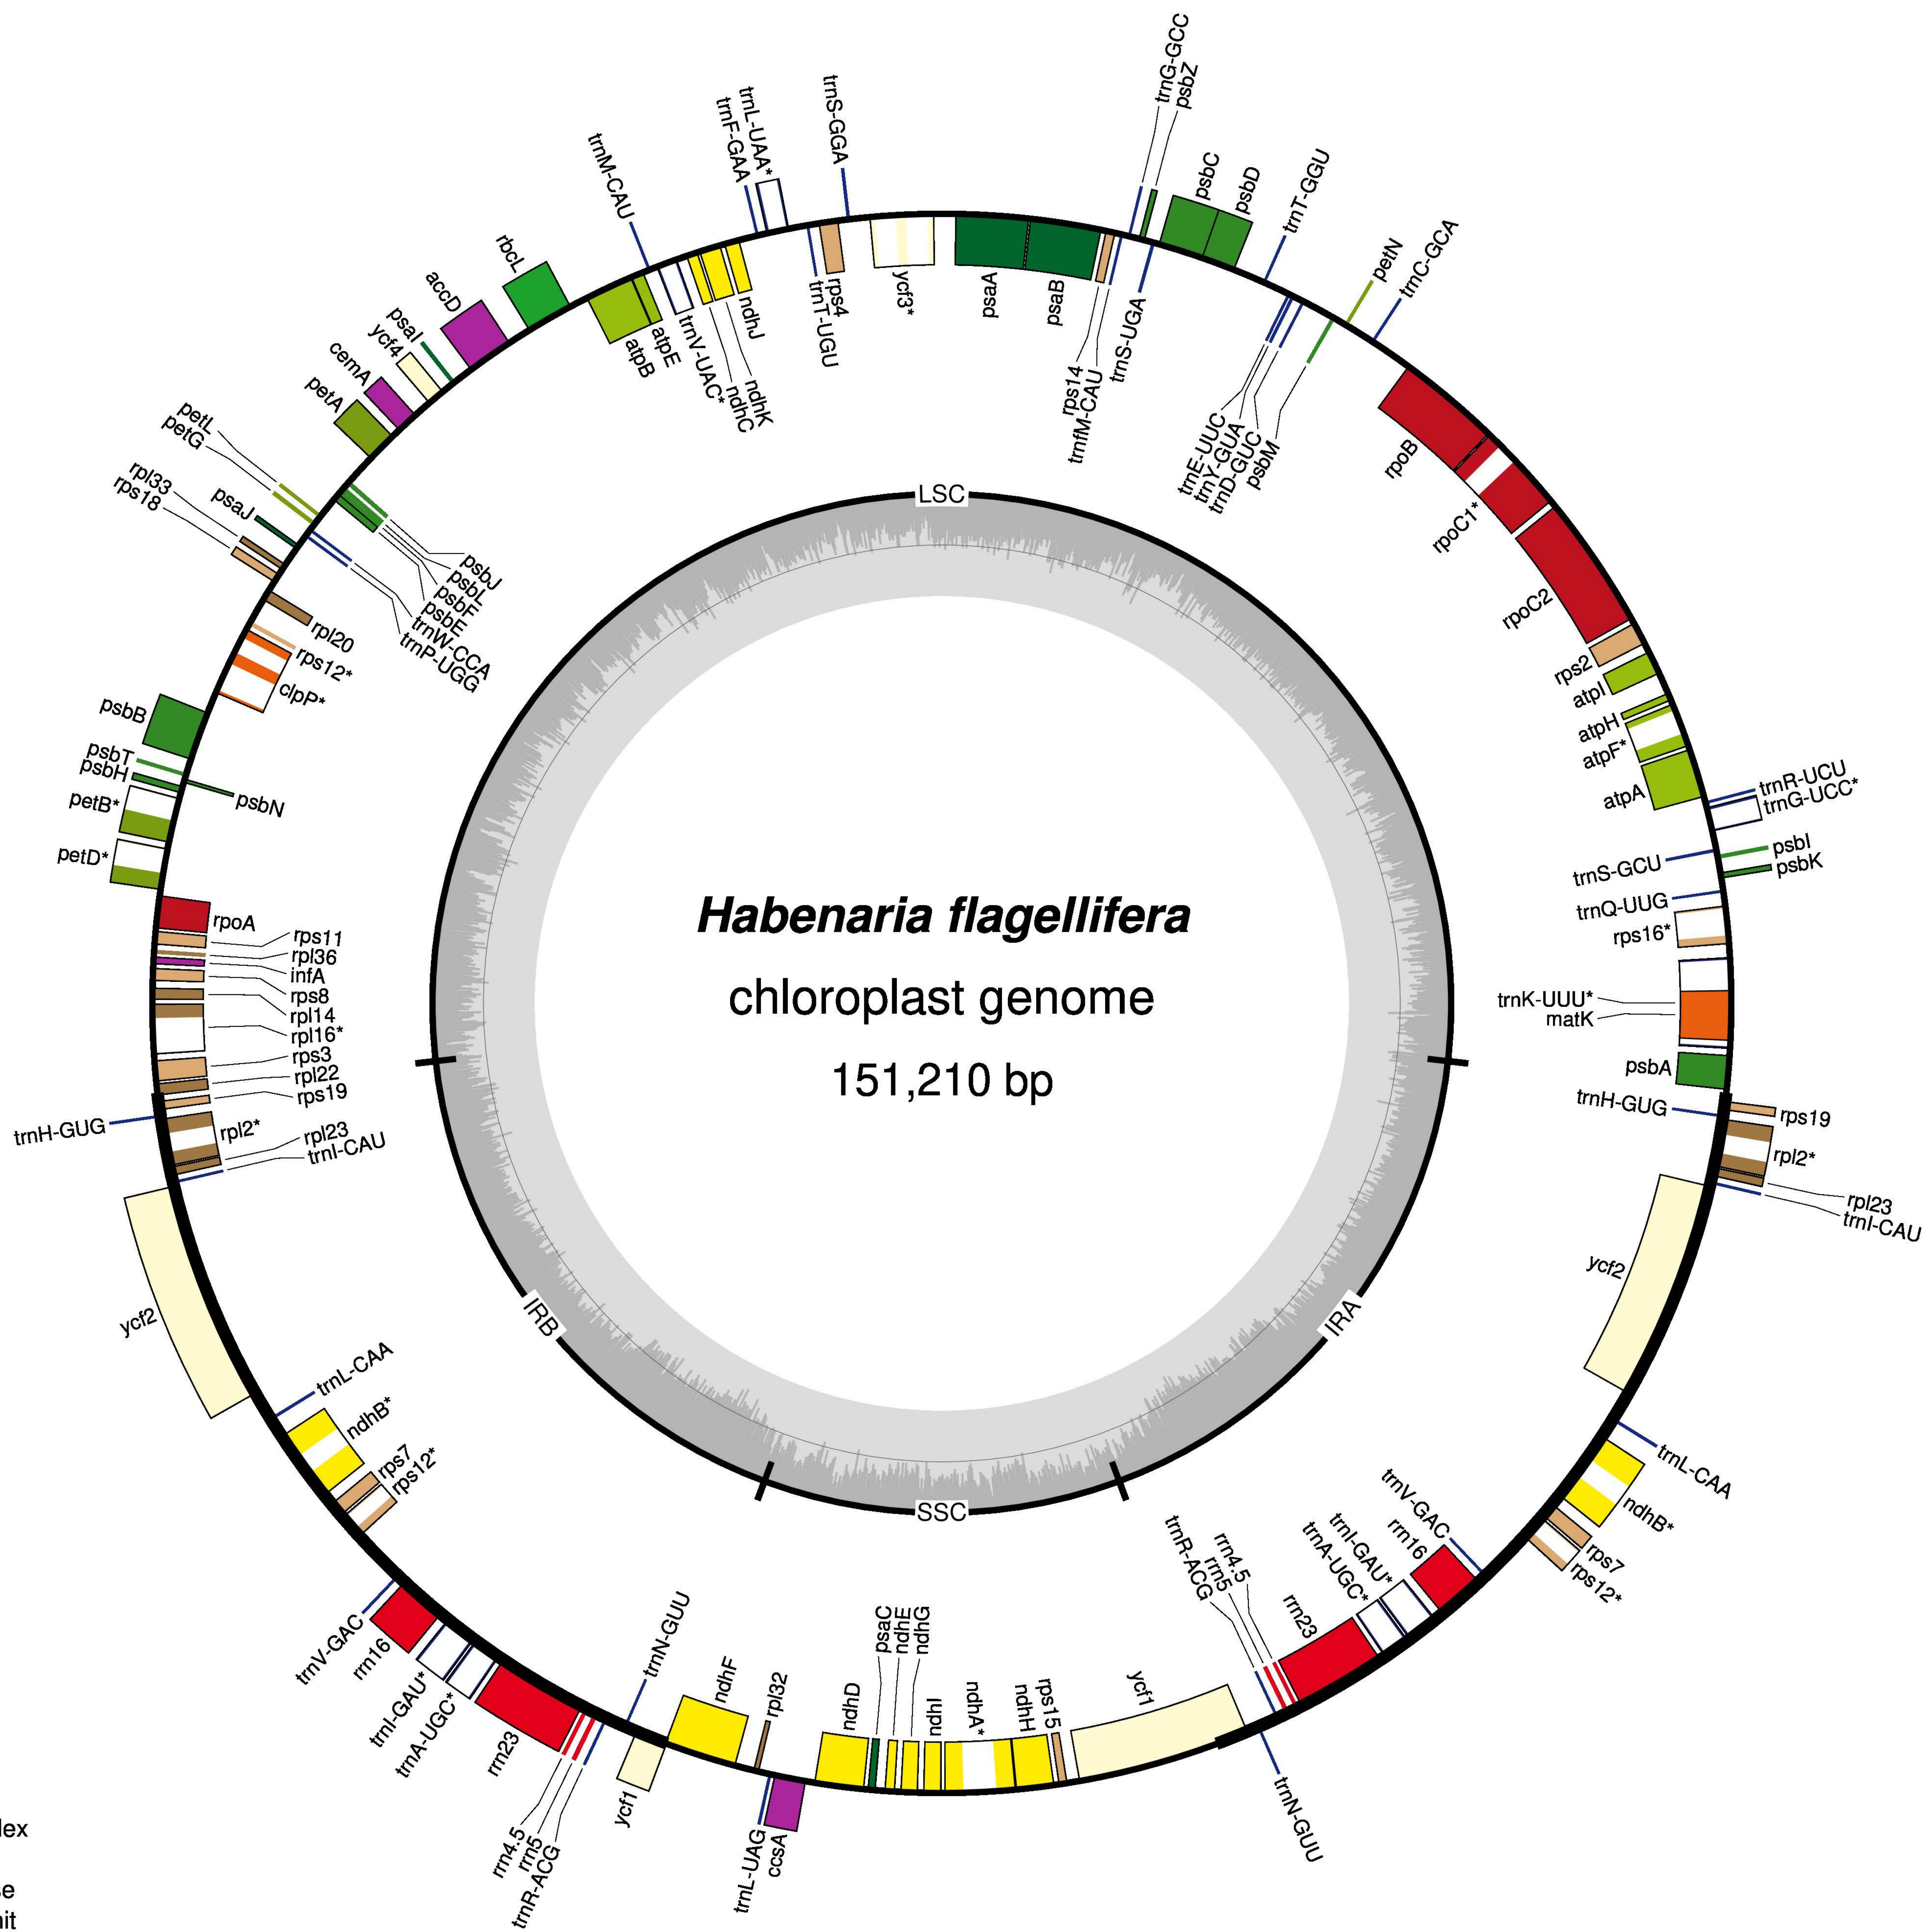

- photosystem I
- photosystem II
- cytochrome b/f complex
- ATP synthase
- NADH dehydrogenase
- RubisCO large subunit
- RNA polymerase
- ribosomal proteins (SSU)
- ribosomal proteins (LSU)
- clpP, matK
- other genes
- hypothetical chloroplast reading frames (ycf)
- transfer RNAs
- ribosomal RNAs
- introns

# Orchidoideae

## Orchideae

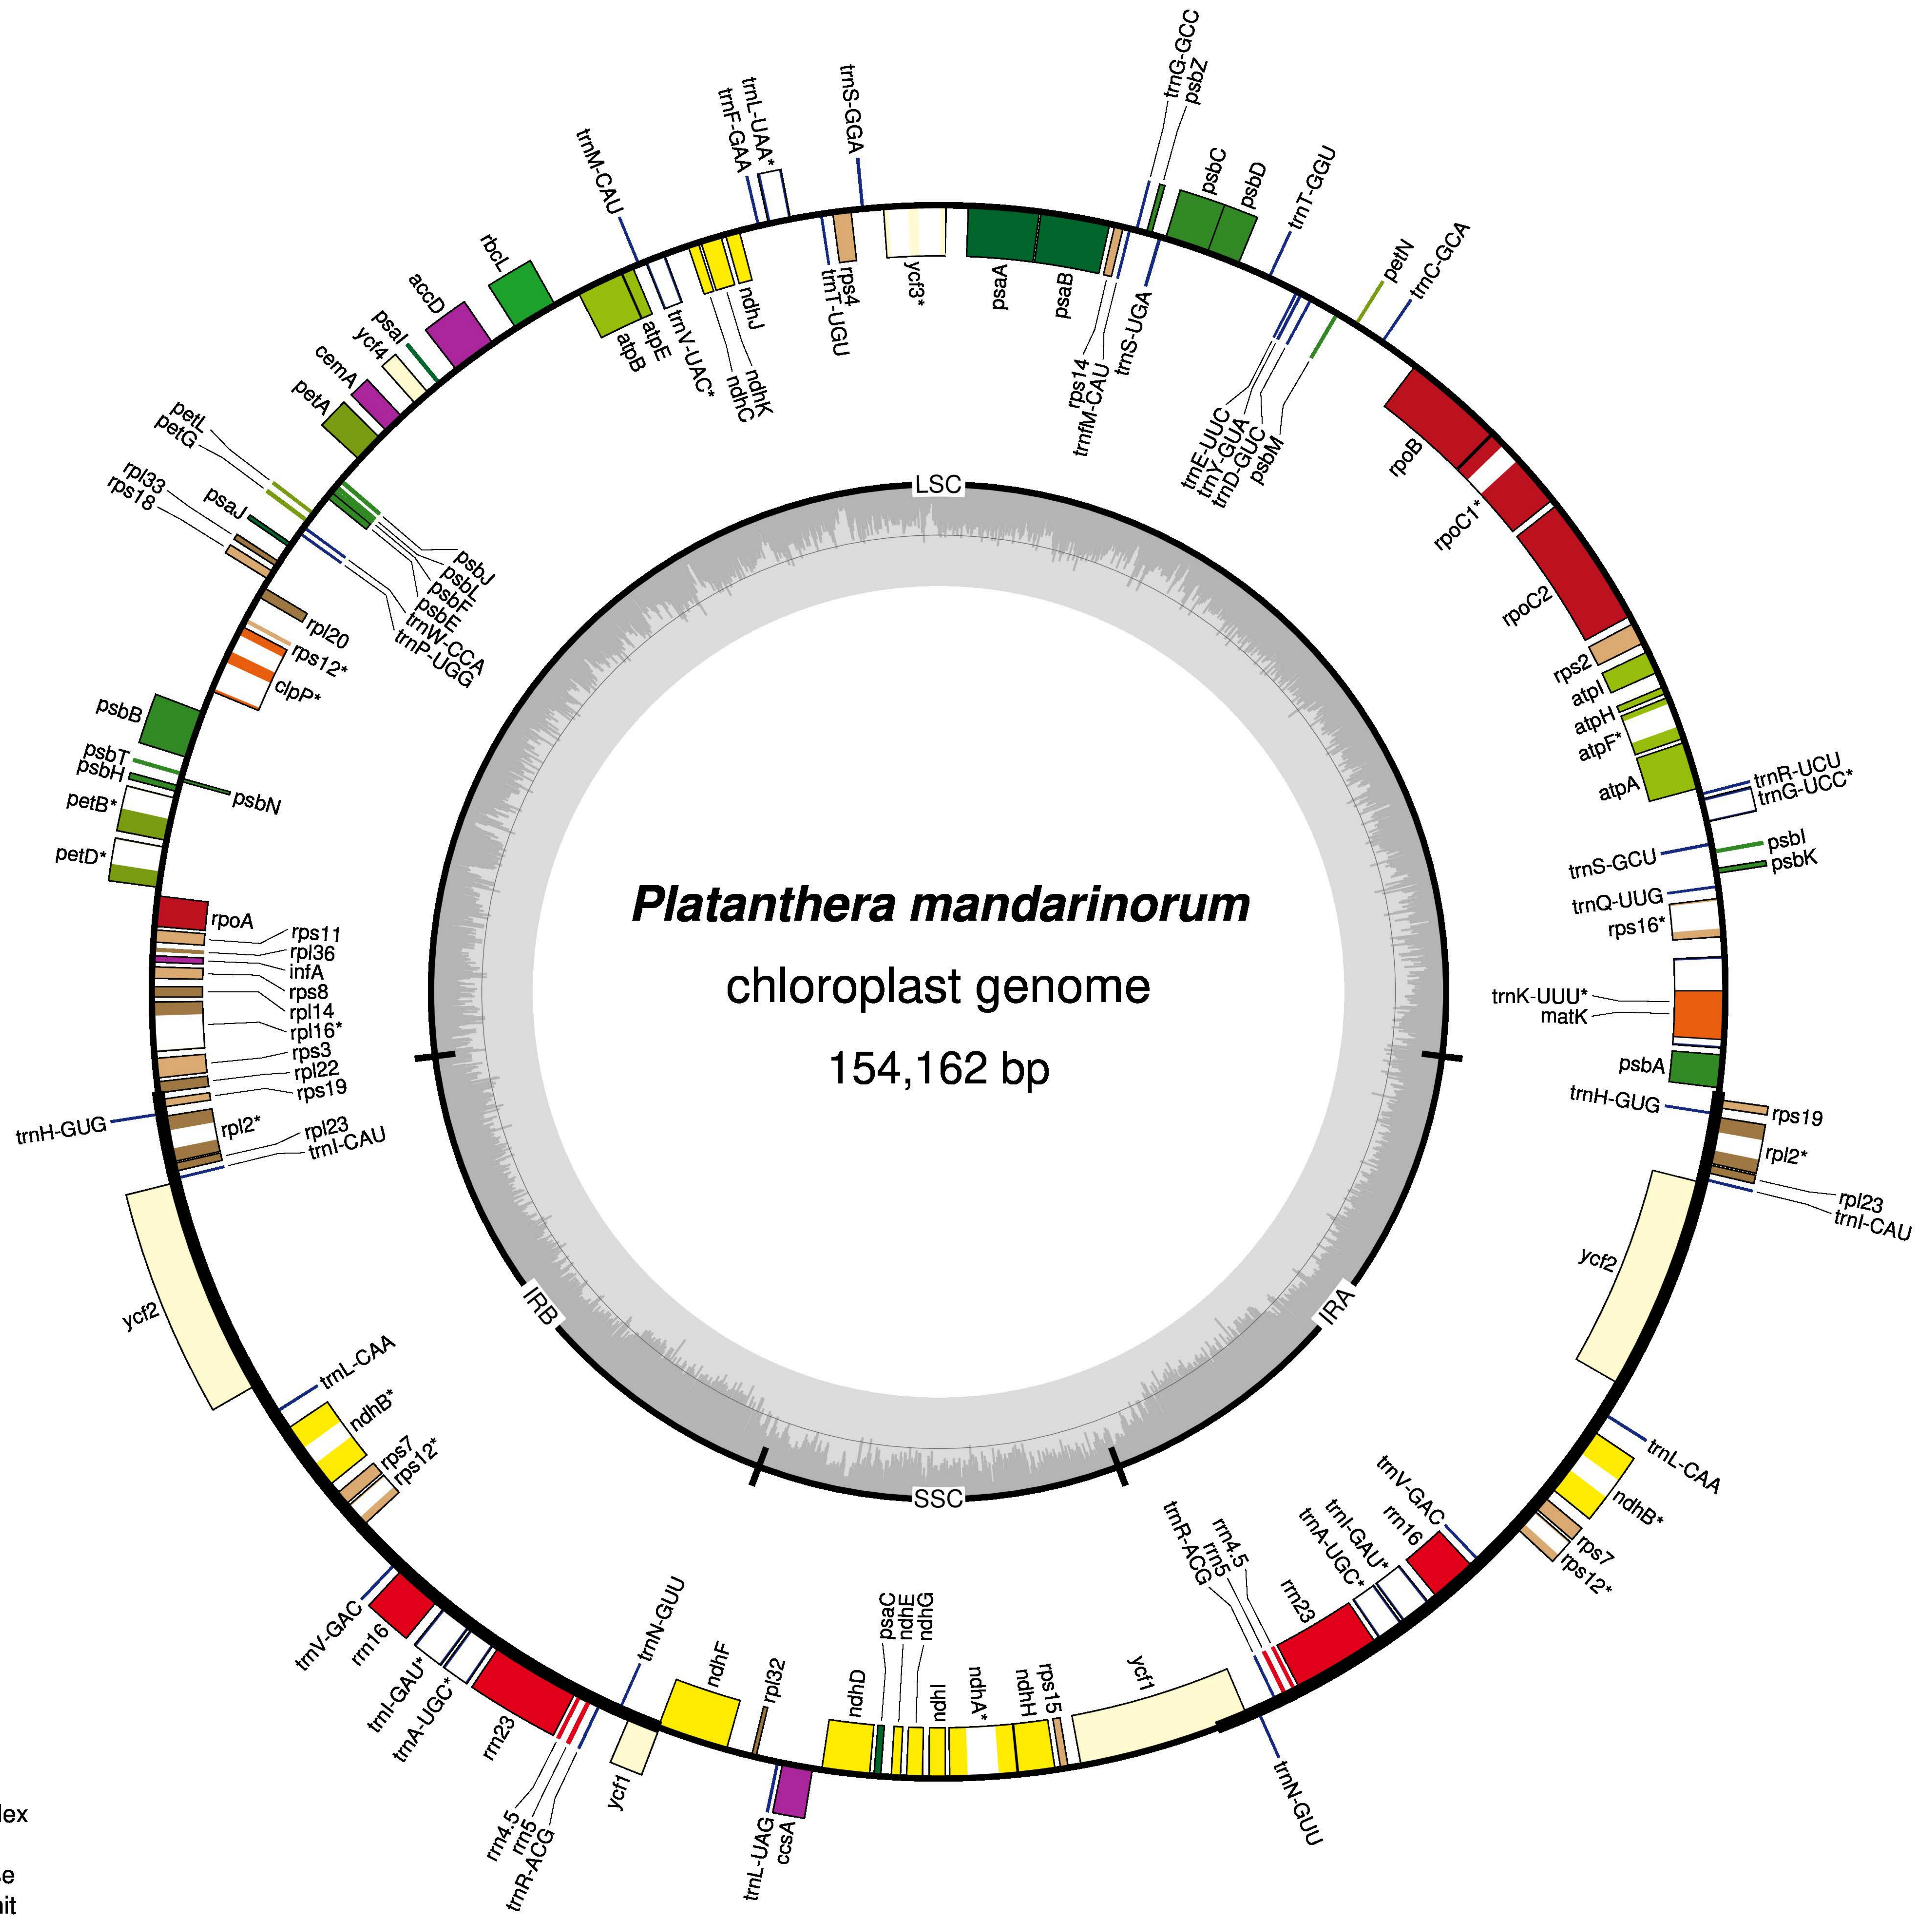

- 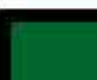 photosystem I
- 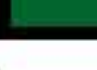 photosystem II
- 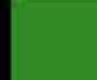 cytochrome b/f complex
- 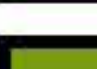 ATP synthase
- 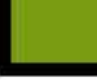 NADH dehydrogenase
- 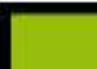 RubisCO large subunit
- 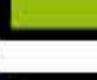 RNA polymerase
- 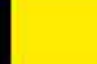 ribosomal proteins (SSU)
- 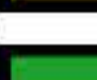 ribosomal proteins (LSU)
- 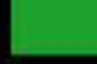 clpP, matK
- 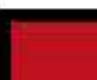 other genes
- 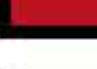 hypothetical chloroplast reading frames (ycf)
- 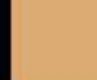 transfer RNAs
- 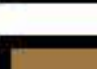 ribosomal RNAs
- 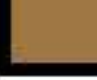 introns
